# Supplementary material
Source: Research Square preprint supplement (doi:10.21203/rs.3.rs-8735458/v1)
Supplement: Supplementary file 1 [file 152cb33c8e450303770dbcfd.xlsx]

## Sheet: summary
	description
GNA11	Hallmark pathways enriched in the cancer cells of GNA11
gna11;bap+-	Hallmark pathways enriched in the cancer cells of GNA11;bap1+-
gna11;P53del	Hallmark pathways enriched in the cancer cells of GNA11;p53del

## Sheet: GNA11
	pathway	pval	padj	log2err	ES	NES	size	leadingEdge	Enrichment
1	HALLMARK_COAGULATION	0.0875912	0.0973236	0.181383	0.128254	1.46987	116	c("anxa1a", "ctsla", "crip2", "fbn2b", "klf7a", "mmp14b", "s100v2", "cxcl8a", "cfd", "sparc", "mmp13a", "mst1", "apoc1", "fn1a", "gda", "csrp1b", "tfa", "c3a.1", "mmp9", "hnf4a", "cfhl2", "f3a", "msrb2", "mbl2", "rnasel2", "s100a1", "lft1", "c3a.3")	Up-regulated
2	HALLMARK_KRAS_SIGNALING_DN	0.206461	0.215063	0.110122	0.0944313	1.23919	157	c("krt4", "tent5c", "ckmb", "pdk2a", "nudt4a", "snn", "gpr19", "krt94", "bmpr1ba", "zc2hc1c", "gprc5c", "slc6a14", "tlx1", "zgc:153932", "fgfr3", "smpx", "chrng", "nr4a2a", "fshb", "pax4", "mast3b", "adra2c", "krt93", "selenop", "slc5a5", "tas2r200.2", "tshba", "ugt2a4", "egf", "htr1d", "krt95", "ccdc106b", "insl5a", "edn2", "shox2", "myh7", "cpa2", "oxt", "il12ba", "cacna1fb", "ngb", "slc30a2", …	Up-regulated
3	HALLMARK_PANCREAS_BETA_CELLS	0.506803	0.506803	0.0701132	0.13957	0.938589	35	c("mafba", "srprb", "sst1.1", "pcsk2", "nkx2.2a", "neurog3", "lmo2", "pax4", "foxa2")	Up-regulated
4	HALLMARK_APICAL_SURFACE	0.306763	0.313024	0.119888	-0.159815	-1.13127	35	c("thy1", "adam10a", "crybg1a", "afap1l2", "flot2a", "adipor2", "sulf2b", "appb", "gstm.2", "dcbld2", "ncoa6", "b4galt1l", "ephb4b", "flot2b", "atp8b1", "mdga1", "il2rga", "gata3", "gstm.3", "gas1a", "rtn4rl1a", "ntng1a", "crybg1b", "si:ch73-173p19.2", "atp6v0a1b", "efna5b")	Down-regulated
5	HALLMARK_ANGIOGENESIS	0.196172	0.208694	0.153159	-0.189064	-1.24252	30	c("icn", "fstl1b", "itgav", "appb", "lrpap1", "nrp1a", "ptk2ab", "vegfaa", "lpl", "slco2a1", "jag2b", "jag1b", "vav2", "tnfrsf21", "ccnd2a", "fgfr1a", "ntd5")	Down-regulated
6	HALLMARK_INFLAMMATORY_RESPONSE	0.0931034	0.101199	0.276501	-0.0919107	-1.42109	157	c("chst2a", "klf6a", "cd40", "emp3b", "hbegfb", "hbegfa", "kif1b", "sri", "atp2b1a", "irf1b", "btg2", "nfkbiaa", "tapbp.1", "pde4ba", "itgb3b", "adrm1", "atp2a2b", "abca1a", "ahr1b", "atp2c1", "selenos", "abca1b", "tnfaip6", "acvr2aa", "itga5", "sc:d0202", "gnai3", "dcbld2", "tpbgb", "abi1a", "si:ch73-22o12.1", "slc7a2", "slc31a1", "irf7", "rhogb", "pcdh7b", "tnfrsf9a", "ptprea", "adma", "rnf144b…	Down-regulated
7	HALLMARK_MYOGENESIS	0.0198589	0.022567	0.352488	-0.0968306	-1.62436	187	c("clu", "myl4", "gsna", "gpx3", "cox6a1", "acsl1a", "mef2cb", "myl6", "col4a2", "myh9b", "gnao1a", "sptan1", "hdac5", "gabarapl2", "hbegfb", "tpm3", "gadd45bb", "mef2d", "hbegfa", "atp6ap1b", "pdlim7", "atp2a1", "agrn", "mef2aa", "schip1", "bhlhe40", "sorbs1", "wwtr1", "ppfia4", "tsc2", "appb", "fdps", "ncam1a", "sh2b1", "mylkb", "camk2b1", "itgb4", "fkbp1b", "ifrd1", "col6a3", "sgcd", "syngr2a"…	Down-regulated
8	HALLMARK_HEDGEHOG_SIGNALING	0.0196948	0.022567	0.352488	-0.236924	-1.6771	35	c("thy1", "myh9b", "dpysl2b", "cntfr", "celsr1b", "amot", "rasa1a", "nrp1a", "nf1b", "cdk6", "vegfaa", "ldb1a", "tle3b", "ophn1", "l1cama", "ptch1", "slit1a", "nrcama", "celsr1a", "l1camb", "plg", "ets2", "adgrg1")	Down-regulated
9	HALLMARK_ESTROGEN_RESPONSE_EARLY	0.0137087	0.0163199	0.38073	-0.112529	-1.83603	180	c("tmprss3a", "aqp3a", "fhl2a", "tfap2c", "dlc1", "mlpha", "elf1", "ncor2", "hbegfb", "rarres3l", "add3a", "ccnd1", "ttc39a", "krt18a.1", "ywhaqb", "tiparp", "tiam1b", "slc7a5", "ugcg", "fosab", "bhlhe40", "igf1ra", "rarres3", "celsr1b", "syngr1a", "farp1", "ywhaqa", "gab2", "abhd2a", "abca3b", "raraa", "kaznb", "wwc1", "il6st", "blvrb", "amfra", "fam102ab", "zgc:91968", "tob1a", "tpbgb", "slc7a2…	Down-regulated
10	HALLMARK_IL6_JAK_STAT3_SIGNALING	0.010916	0.0133122	0.38073	-0.189991	-1.86179	64	c("stat2", "crfb4", "grb2b", "cntfr", "socs3b", "jun", "irf1b", "stat1a", "stat3", "pim1", "tnfrsf1a", "hmox1a", "itgb3b", "irf9", "stam2", "ifngr1l", "il6st", "tyk2", "itga4", "cbl", "ptpn11a", "tgfb1a", "cxcl11.1", "socs3a", "ptpn1", "ptpn2b", "acvrl1", "il13ra1", "fas", "myd88", "tnfrsf21", "zmp:0000000936", "csf2rb", "lifrb")	Down-regulated
11	HALLMARK_XENOBIOTIC_METABOLISM	0.0038703	0.00483787	0.431708	-0.116276	-1.95799	186	c("mt2", "gabarapb", "cndp2", "pora", "pgrmc1", "pdlim5b", "id2a", "idh1", "aldh9a1a.1", "ndrg2", "pgd", "ddt", "tyr", "tnfrsf1a", "tegt", "slc6a6b", "fah", "nmt1a", "hmox1a", "psmb10", "atp2a2b", "sar1b", "man1a1", "acp1", "arpp19b", "gstm.2", "aox6", "slc12a4", "blvrb", "gsr", "slc35b1", "nfs1", "tkfc", "ddah2", "acox1", "cyb5a", "ptges3a", "mccc2", "bcar1", "epha2b", "papss2b", "aco2", "ahcy",…	Down-regulated
12	HALLMARK_EPITHELIAL_MESENCHYMAL_TRANSITION	0.00377713	0.00483787	0.431708	-0.123321	-1.99843	178	c("vim", "thy1", "efemp2a", "col4a1", "fstl1b", "serpine2", "mfap5", "loxl2b", "col4a2", "tpm1", "flna", "pmp22b", "tnfaip3", "fermt2", "emp3b", "hbegfb", "gadd45bb", "gpc1b", "tpm4a", "pdlim4", "jun", "id2a", "myl9b", "vcam1b", "notch2", "itgav", "sdc4", "plod3", "copa", "lamc1", "itgb3b", "serpinh1a", "mmp2", "tgfbr3", "mylkb", "qsox1", "ndnl2", "pcolce2b", "col6a3", "sgcd", "itga5", "wipf1b", …	Down-regulated
13	HALLMARK_BILE_ACID_METABOLISM	0.00163516	0.00215153	0.45506	-0.167184	-2.07103	102	c("acsl1a", "rxraa", "atxn1a", "sod1", "idh1", "lipeb", "aldh9a1a.1", "abca1a", "gclm", "abca3b", "abca1b", "nedd4a", "abca5", "idh2", "abcd3a", "bmp6", "isoc1", "slco1c1", "nr1i2", "lonp2", "idi1", "npc1", "nudt12", "cat", "abca2", "hsd17b4", "fdxr", "slc35b2", "gstk1", "pxmp2", "pex16", "pex26", "pecr", "pex7", "hacl1", "gnpat", "pex19", "scp2a", "nr3c2", "cyp46a1.2", "crot", "pex13", "hsd3b7",…	Down-regulated
14	HALLMARK_SPERMATOGENESIS	0.00121592	0.00164313	0.45506	-0.164668	-2.15866	116	c("hsp70.3", "dnajb6b", "gapdhs", "rpl39", "prkar2aa", "psmg1", "vdac3", "mtor", "mllt10", "cct6a", "dnajb6a", "stam2", "gstm.2", "tktb", "naa10", "agfg1a", "clgn", "pgk1", "ide", "ldha", "hsp70l", "mast2", "slc12a2", "jam3b", "chfr", "ezh2", "pgs1", "braf", "phkg2", "ttk", "tsn", "pias2", "papola", "strbp", "arl4ab", "coil", "il13ra2", "zc3h14", "cdk1", "csnk2a2b", "rad17", "ift88", "gmcl1", "pa…	Down-regulated
15	HALLMARK_MYC_TARGETS_V2	0.000369107	0.000512648	0.498493	-0.256688	-2.3773	58	c("cbx3a", "nop16", "nop56", "pa2g4b", "dusp2", "nop2", "mycb", "grwd1", "aimp2", "ipo4", "srm", "phb", "mcm5", "pes", "slc19a1", "prmt3", "imp4", "nolc1", "plk1", "mcm4", "hk2", "sord", "unga", "exosc5", "mphosph10", "las1l", "pus1", "rrp12", "tbrg4", "noc4l", "utp20", "nip7", "dctpp1", "tmem97", "wdr74", "pprc1", "cdk4", "ndufaf4", "plk4", "slc29a2", "si:ch211-1i11.3")	Down-regulated
16	HALLMARK_ESTROGEN_RESPONSE_LATE	0.000117047	0.000172128	0.538434	-0.151723	-2.42053	171	c("tmprss3a", "tfap2c", "sgk1", "ncor2", "hbegfb", "rarres3l", "id2a", "add3a", "ccnd1", "ywhaqb", "cdh1", "tiam1b", "slc7a5", "fosab", "emp2", "rarres3", "jak1", "farp1", "ywhaqa", "aldh3a2b", "etfb", "dnajc1", "abhd2a", "abca3b", "dlg5a", "plxnb1b", "dusp2", "pdcd4b", "cxcl14", "rabep1", "il6st", "blvrb", "amfra", "fam102ab", "tob1a", "tpbgb", "cox6c", "btg3", "idh2", "siah2l", "papss2b", "pkp3…	Down-regulated
17	HALLMARK_NOTCH_SIGNALING	0.000164174	0.000234534	0.518848	-0.381186	-2.43164	28	c("lfng", "skp1", "rbx1", "notch2", "ccnd1", "tcf7l2", "aph1b", "psenen", "prkcaa", "fbxw11b", "dtx4b", "cul1b", "fzd7b", "psen2", "heyl", "fzd1", "ppardb", "jag1b", "kat2a")	Down-regulated
18	HALLMARK_WNT_BETA_CATENIN_SIGNALING	8.37202e-05	0.000127059	0.538434	-0.321567	-2.48008	41	c("ctnnb1", "rbpjb", "hdac5", "ncor2", "gnai1", "tp53", "hdac1", "dvl2", "cul1b", "psen2", "csnk1e", "CABZ01110881.1", "mycb", "maml1", "gbp", "ptch1", "jag2b", "numb", "fzd1", "ppardb", "axin1", "jag1b", "wnt5b", "kat2a", "adam17a", "ccnd2a", "axin2", "hdac11", "skp2", "fzd8a", "tcf7")	Down-regulated
19	HALLMARK_KRAS_SIGNALING_UP	8.38591e-05	0.000127059	0.538434	-0.160971	-2.52436	168	c("glrx", "psmb8a", "akap12b", "tnfaip3", "hbegfb", "hbegfa", "ammecr1", "cab39l", "id2a", "gadd45ga", "ctss2.1", "rbm4.2", "rabgap1l", "ets1", "rbm4.1", "nrp1a", "dusp6", "si:dkeyp-82a1.6", "itgb2", "dcbld2", "map3k1", "ccser2a", "gfpt2", "fuca1.1", "evi5b", "hdac9b", "avl9", "akt2", "strn", "birc2", "cbl", "adgrl4", "ppp1r15a", "mtmr10", "cbx8a", "si:ch211-241b2.5", "jupb", "laptm5", "igf2b", "…	Down-regulated
20	HALLMARK_COMPLEMENT	1.77398e-05	2.86125e-05	0.57561	-0.173669	-2.72348	168	c("clu", "mt2", "calm2a", "anxa5b", "pfn1", "ctsba", "ehd1b", "timp2a", "col4a2", "pik3ca", "atox1", "mmp15b", "tnfaip3", "ctsc", "grb2b", "psmb9a", "irf2", "src", "ppp2cb", "irf1b", "csrp1a", "pim1", "lgals3a", "ctsd", "lamp2", "ctss2.1", "si:ch211-71m22.1", "dock4b", "calm3a", "ctsh", "usp14", "cblb", "rabif", "stx4", "dusp6", "gnb2", "gnai3", "usp8", "zeb1b", "gmfb", "adam9", "gnb4b", "rnf4", …	Down-regulated
21	HALLMARK_UV_RESPONSE_UP	1.54178e-05	2.56963e-05	0.57561	-0.179285	-2.80404	161	c("aqp3a", "gpx3", "dnajb1b", "tuba8l4", "junba", "ppt1", "tuba8l3", "bcl2l11", "stk25b", "psmc3", "arrb2b", "bsg", "cnp", "selenow1", "irf1b", "rab27a", "ap2s1", "btg2", "nfkbiaa", "hnrnpub", "atp6v1c1a", "fosab", "tegt", "rpn1", "hmox1a", "tap1", "atp6v1f", "cltb", "prkacab", "dnaja1", "il6st", "sc:d0202", "urod", "hnrnpua", "prpf3", "btg3", "slc6a8", "nr4a1", "pole3", "polr2h", "furinb", "cdc5…	Down-regulated
22	HALLMARK_ALLOGRAFT_REJECTION	9.66469e-07	1.72584e-06	0.643552	-0.198843	-3.02896	154	c("mhc1uba", "b2m", "thy1", "mhc1zba", "cd74a", "galnt1", "eif5a2", "elf1", "socs5b", "flna", "cd40", "rpl39", "ube2na", "rps9", "stat1a", "ube2d1b", "ctss2.1", "tapbp.1", "ly75", "degs1", "psmb10", "tap1", "bcl3", "ube2nb", "ccl19a.1", "ets1", "rps19", "eif3d", "il16", "apbb1", "ifngr1l", "mhc1zfa", "eif4g3a", "acvr2aa", "sc:d0202", "abce1", "itgb2", "ikbkb", "abi1a", "map3k7", "tap2a", "csk", "…	Down-regulated
23	HALLMARK_HYPOXIA	9.43226e-07	1.72584e-06	0.659444	-0.179829	-3.11861	198	c("icn", "mt2", "glrx", "mif", "cavin2b", "myh9b", "chst2a", "gpc4", "akap12b", "wsb1", "klf6a", "nr3c1", "cavin1b", "rbpjb", "anxa2a", "tnfaip3", "gapdhs", "gpc1b", "jun", "nedd4l", "pim1", "sdc4", "tiparp", "aldocb", "hdlbpa", "fosab", "bhlhe40", "sdc2", "bnip3lb", "slc6a6b", "ppfia4", "hmox1a", "hs3st1l2", "atp7a", "fosl2", "ets1", "prkcaa", "mxi1", "znf292a", "ext1a", "hk1", "tes", "kdm3b", "…	Down-regulated
24	HALLMARK_CHOLESTEROL_HOMEOSTASIS	1.41644e-06	2.44214e-06	0.643552	-0.308632	-3.15111	69	c("clu", "actb1", "anxa5b", "ctnnb1", "gnai1", "cpeb2", "lgals3a", "aldocb", "si:ch211-71m22.1", "anxa13", "fdps", "gstm.2", "nfil3", "lpl", "anxa13l", "acss2", "atxn2", "alcamb", "tp53inp1", "srebf2", "ethe1", "idi1", "lgmn", "ldlra", "abca2", "acat2", "gusb", "jag1b", "ebp", "pdk3a", "nsdhl", "sc5d", "pcyt2", "hmgcs1", "dhcr7", "tm7sf2", "mvda", "cyp51", "gpx8", "ech1", "pmvk", "chka", "stx5a",…	Down-regulated
25	HALLMARK_IL2_STAT5_SIGNALING	7.01429e-08	1.3489e-07	0.704976	-0.212034	-3.43607	175	c("ahnak", "pleca", "cd81a", "plpp1a", "gabarapb", "anxa4", "klf6a", "dennd5a", "spred2b", "hipk2", "huwe1", "wls", "gadd45bb", "cyfip1", "itgav", "pim1", "ctsz", "hopx", "tiam1b", "bhlhe40", "fah", "mapkapk2a", "igf1ra", "si:ch211-71m22.1", "snx9b", "rabgap1l", "nrp1a", "ptrh2", "ahr1b", "cdc42se2", "ifngr1l", "bmpr2b", "nfil3", "rragd", "syngr2a", "enpp1", "twsg1a", "cd83", "ncoa3", "tnfrsf9a",…	Down-regulated
26	HALLMARK_PEROXISOME	2.5184e-08	5.24666e-08	0.733762	-0.289414	-3.48404	97	c("acsl1a", "atxn1a", "sod1", "acsl4a", "crabp2b", "idh1", "mvp", "aldh9a1a.1", "vps4b", "crabp2a", "hsd11b2", "ywhah", "abcc5", "smarcc1a", "fdps", "fis1", "pex14", "acox1", "idh2", "ide", "abcd3a", "cln8", "cnbpa", "hmgcl", "isoc1", "eci2", "nr1i2", "cdk7", "lonp2", "cln6a", "idi1", "hrasb", "cadm1a", "cat", "hsd17b4", "crata", "pabpc1b", "dlg4a", "siah1", "slc25a17", "slc35b2", "ercc3", "top2a…	Down-regulated
27	HALLMARK_REACTIVE_OXYGEN_SPECIES_PATHWAY	3.44975e-08	6.89951e-08	0.719513	-0.429244	-3.50058	45	c("glrx", "gpx3", "sod1", "junba", "atox1", "txn", "lamtor5", "stk25b", "prdx2", "pdlim1", "ndufs2", "abcc1", "ndufb4", "oxsr1b", "mbpb", "gclm", "selenos", "gsr", "zgc:56095", "hmox2b", "pfkpb", "pfkpa", "egln2", "sbno2a", "cat", "g6pd", "ptpa", "scaf4a", "glrx2", "srxn1", "gclc", "prdx4", "ercc2", "gpx4b", "nqo1")	Down-regulated
28	HALLMARK_ANDROGEN_RESPONSE	5.06827e-10	1.26707e-09	0.801216	-0.314202	-3.80378	98	c("mhc1uba", "b2m", "myl12.1", "plpp1a", "sgk1", "spcs3", "akap12b", "pdlim5b", "arid5b", "ptpn21", "zmiz1a", "tmem50a", "ccnd1", "itgav", "tsc22d1", "srp19", "adrm1", "abhd2a", "pa2g4b", "ube2ia", "rps6ka3b", "acsl3b", "zbtb10", "insig1", "cdc14b", "ell2", "cdk6", "gnai3", "gsr", "appbp2", "slc38a2", "myl12.2", "stk39", "vapal", "ncoa4", "lman1", "sec24d", "abcc4", "tpd52", "pgm3", "herc3", "xrc…	Down-regulated
29	HALLMARK_APOPTOSIS	6.57012e-10	1.42829e-09	0.801216	-0.264833	-3.88298	142	c("clu", "gsna", "gpx3", "hmgb2a", "timp2a", "sod1", "slc20a1b", "sptan1", "ppt1", "bcap31", "ctnnb1", "gadd45bb", "erbb2", "bcl2l11", "igfbp6b", "jun", "dap", "etf1b", "ccnd1", "irf1b", "txnipa", "krt18a.1", "btg2", "casp8", "lgals3a", "ppp3r1b", "add1", "xiap", "bnip3lb", "hmox1a", "lmna", "mmp2", "tap1", "appb", "tgfbr3", "raraa", "ppp2r5b", "gstm.2", "ifngr1l", "crebbpa", "pdcd4b", "bnip3la",…	Down-regulated
30	HALLMARK_TNFA_SIGNALING_VIA_NFKB	6.21798e-10	1.41318e-09	0.801216	-0.241119	-3.90739	175	c("stat5a", "ehd1b", "sgk1", "serpinb1l1", "tnip1", "tnfaip2a", "klf6a", "junba", "dennd5a", "phlda2", "tnfaip3", "pdlim5b", "rcan1a", "hbegfb", "egr1", "gadd45bb", "hbegfa", "socs3b", "atp2b1a", "jun", "id2a", "ccnd1", "irf1b", "btg2", "nfkbiaa", "nfe2l2a", "serpinb14", "tsc22d1", "sdc4", "tiparp", "ier2b", "fosab", "bhlhe40", "pde4ba", "tap1", "bcl3", "abca1a", "fosl2", "nfkb2", "abca1b", "ier5…	Down-regulated
31	HALLMARK_P53_PATHWAY	5.61997e-10	1.33809e-09	0.801216	-0.237568	-3.93571	182	c("icn", "ccng1", "rps27l", "zbtb16a", "cd81a", "s100a10b", "fbxw7", "rxraa", "stom", "phlda3", "hbegfb", "hbegfa", "jun", "tp53", "ctsf", "dgkaa", "txnipa", "sesn1", "ywhaqb", "btg2", "gm2a", "tsc22d1", "ctsd", "hexim1", "fosab", "ifi30", "tax1bp3", "hmox1a", "abcc5", "ywhaqa", "tap1", "appb", "rap2b", "mdm2", "ip6k2b", "kif13ba", "csrnp2", "itgb4", "ier5", "iscub", "tm4sf18", "tm7sf3", "pcna", …	Down-regulated
32	HALLMARK_APICAL_JUNCTION	3.18025e-12	8.36907e-12	0.898671	-0.251983	-4.11455	179	c("actb1", "thy1", "pfn1", "cd99", "cnn2", "actn4", "tjp1a", "arpc2", "msna", "myh9b", "zyx", "pik3cb", "rsu1", "cap1", "gnai1", "arhgef6", "myl9b", "skap2", "src", "vcam1b", "tspan4a", "pard6gb", "ctnnd1", "fscn1a", "myh10", "cdh1", "nlgn2a", "ctnna1", "shc1", "ywhah", "wasla", "cd276", "exoc4", "pik3r3b", "mmp2", "cadm3", "rras", "rasa1a", "rac2", "nf1b", "evla", "itgb4", "ikbkg", "ndnl2", "fln…	Down-regulated
33	HALLMARK_HEME_METABOLISM	6.04351e-13	1.67875e-12	0.921426	-0.26686	-4.30973	176	c("myl4", "aqp3a", "ucp2", "ctsba", "tns1b", "acsl1a", "sdcbp2", "clic2", "nr3c1", "cast", "sptan1", "prdx2", "bsg", "btg2", "dmtn", "lrp10", "clcn3", "add1", "tmem9b", "lamp2", "nfe2l1b", "tyr", "bnip3lb", "atp6v0a1a", "nek7", "mboat2a", "rbm5", "tspan5a", "gclm", "mxi1", "psmd9", "mark3b", "ppp2r5b", "gapvd1", "bnip3la", "gmps", "nnt", "blvrb", "kat2b", "si:dkey-237i9.1", "ell2", "mark3a", "uro…	Down-regulated
34	HALLMARK_INTERFERON_ALPHA_RESPONSE	2.03986e-13	6.37457e-13	0.943632	-0.457595	-4.48411	64	c("b2m", "cd74a", "psmb8a", "psme2", "psme1", "elf1", "stat2", "uba7", "mov10b.1", "psmb9a", "trim25", "irf2", "cnp", "irf1b", "txnipa", "casp8", "mxb", "psma3", "ifi30", "si:ch211-71m22.1", "tap1", "irf9", "mxc", "mxa", "ifi35", "parp12a", "mvb12a", "epsti1", "dhx58", "ifih1", "adar", "irf7", "ifit11", "parp9", "cmtr1", "isg20", "eif2ak2", "nub1", "cxcl11.1", "tdrd7b", "usp18", "mxe", "cmpk2", "…	Down-regulated
35	HALLMARK_TGF_BETA_SIGNALING	2.57071e-14	8.56903e-14	0.975995	-0.532554	-4.5079	49	c("fkbp1aa", "tjp1a", "fkbp1ab", "junba", "slc20a1b", "ctnnb1", "sptbn1", "apc", "ncor2", "hipk2", "id2a", "hdac1", "rhoab", "cdh1", "xiap", "smurf2", "wwtr1", "skia", "skila", "bmpr2b", "cdk9", "trim33", "ube2d3", "tjp1b", "map3k7", "ppm1aa", "thbs1b", "furinb", "id3", "acvr1l", "smad7", "ppp1r15a", "ppp1cab", "smad1", "fnta", "tgfb1a", "smurf1", "smad3a", "bmpr1aa", "smad6b")	Down-regulated
36	HALLMARK_UNFOLDED_PROTEIN_RESPONSE	2.44678e-13	7.19641e-13	0.932595	-0.35248	-4.51489	112	c("zbtb17", "banf1", "spcs3", "sec11a", "atf4b", "spcs1", "eif4ebp1", "cnot6a", "hsp90b1", "atf4a", "eif4a1a", "fkbp14", "shc1", "slc7a5", "atp6v0d1", "eif4g1a", "nabp1a", "lsm4", "ssr1", "nop56", "eif4eb", "hyou1", "eif4a1b", "khsrp", "herpud1", "calr", "nhp2", "edem1", "lsm1", "exoc2", "kif5ba", "CABZ01080568.1", "exosc1", "cnot2", "dcp2", "vegfaa", "srpra", "edc4", "parn", "ifit11", "yif1a", "…	Down-regulated
37	HALLMARK_PI3K_AKT_MTOR_SIGNALING	1.23807e-15	5.6276e-15	1.01754	-0.376896	-4.75915	108	c("pfn1", "cfl1", "arpc3", "ywhabb", "ywhaba", "stat2", "ube2na", "cltca", "grb2b", "actr2b", "rac1a", "cab39l", "ap2m1a", "hsp90b1", "ywhaqb", "prkar2aa", "arhgdia", "arf1", "tiam1b", "smad2", "tnfrsf1a", "cltcb", "map2k6", "ppp2r1bb", "tsc2", "ywhaqa", "pik3r3b", "ube2nb", "pin1", "eif4eb", "grk3", "rptor", "rps6ka3b", "prkag1", "calr", "ube2d3", "map3k7", "plcg1", "mapk1", "csnk2b", "ralba", "…	Down-regulated
38	HALLMARK_FATTY_ACID_METABOLISM	6.03066e-15	2.15381e-14	0.996986	-0.325247	-4.8082	143	c("psme1", "s100a10b", "acsl1a", "gabarapb", "mif", "ostc", "acsl4a", "gapdhs", "suclg1", "mgll", "idh1", "ptprga", "adsl", "aldh9a1a.1", "pcbd1", "mdh1aa", "acadvl", "dldh", "acadm", "serinc1", "suclg2", "ywhah", "adipor2", "aldh3a2b", "idh3b", "mdh2", "sdhdb", "hsdl2", "bckdhb", "sucla2", "eci1", "urod", "idh3g", "tp53inp2", "hsd17b10", "acox1", "hadh", "hadhb", "ldha", "echs1", "aco2", "dlst",…	Down-regulated
39	HALLMARK_UV_RESPONSE_DN	2.55445e-15	9.8248e-15	1.00732	-0.328851	-4.80883	139	c("mt2", "fhl2a", "dlc1", "rxraa", "tjp1a", "atxn1a", "igfbp5b", "atrx", "anxa4", "apbb2b", "nr3c1", "prkceb", "pmp22b", "anxa2a", "pdlim5b", "erbb2", "mgll", "ptpn21", "sri", "atp2b1a", "zmiz1a", "add3a", "cdon", "notch2", "spop", "celf2", "kita", "abcc1", "schip1", "lamc1", "bhlhe40", "sdc2", "igf1ra", "itgb3b", "pik3r3b", "nek7", "atrn", "tgfbr3", "rnd3a", "prkcaa", "nrp1a", "atp2c1", "prkcea"…	Down-regulated
40	HALLMARK_GLYCOLYSIS	1.97558e-15	8.23158e-15	1.00732	-0.288784	-4.99166	191	c("glrx", "ppiab", "ppiaa", "mif", "sod1", "chst2a", "gpc4", "psmc4", "pkma", "txn", "gapdhs", "gpc1b", "idh1", "ppp2cb", "ndufv3", "aldh9a1a.1", "mdh1aa", "agrn", "dldh", "hdlbpa", "pgam1a", "sdc2", "pgam1b", "ppfia4", "copb2", "mxi1", "znf292a", "qsox1", "mdh2", "ext1a", "gfpt1", "arpp19b", "tktb", "pam", "aldh7a1", "rpe", "rbck1", "rragd", "tpbgb", "prps1b", "ext2", "gnpda1", "cyb5a", "pmm2", …	Down-regulated
41	HALLMARK_INTERFERON_GAMMA_RESPONSE	7.071e-18	3.5355e-17	1.08644	-0.360628	-5.31934	144	c("mt2", "b2m", "cd74a", "psmb8a", "psme2", "psme1", "rnf213a", "tnfaip2a", "stat2", "psmb2", "cd40", "tnfaip3", "arid5b", "vamp5", "lats2", "sri", "socs3b", "psmb9a", "mvp", "trim25", "irf2", "vcam1b", "irf1b", "txnipa", "nfkbiaa", "stat1a", "znfx1", "stat3", "auts2a", "pim1", "casp8", "mxb", "psma3", "tor1", "ifi30", "tapbp.1", "pde4ba", "psmb10", "si:ch211-71m22.1", "tap1", "peli1b", "irf9", "…	Down-regulated
42	HALLMARK_MTORC1_SIGNALING	1.01777e-21	5.65428e-21	1.20398	-0.324987	-5.68564	204	c("glrx", "ccng1", "ppiab", "atp5mc1", "ppiaa", "tuba8l4", "canx", "ddx39aa", "igfbp5b", "fkbp2", "psmc4", "sec11a", "hspa4a", "tuba8l3", "ctsc", "actr2b", "psmd12", "etf1b", "idh1", "hsp90b1", "skap2", "rab1ab", "add3a", "psma4", "m6pr", "btg2", "psmg1", "psmb5", "psmd14", "ufm1", "slc7a5", "psma3", "uso1", "arpc5la", "bhlhe40", "ifi30", "psmc2", "slc6a6b", "adipor2", "nmt1a", "rpn1", "serpinh1a…	Down-regulated
43	HALLMARK_ADIPOGENESIS	8.40908e-25	5.25567e-24	1.2871	-0.358876	-6.18197	196	c("ucp2", "gpx3", "cox8a", "col4a1", "stat5a", "cox6a1", "uqcr10", "cox7b", "cd151l", "uqcrq", "stom", "cavin2b", "sod1", "ndufb7", "pora", "cavin1b", "prdx3", "suclg1", "aplp2", "ndufa5", "mgll", "agpat3", "idh1", "lipeb", "itsn1", "ndufs3", "ddt", "dldh", "phldb1b", "acadm", "sorbs1", "fah", "nabp1a", "adipor2", "nmt1a", "rtn3", "gphna", "uqcrc1", "immt", "etfb", "mtch2", "abca1a", "baz2a", "rn…	Down-regulated
44	HALLMARK_PROTEIN_SECRETION	5.717e-28	4.08357e-27	1.37274	-0.552681	-6.44371	92	c("cd63", "adam10a", "sod1", "rab2a", "ppt1", "arfip1", "cltca", "ctsc", "rer1", "kif1b", "snx2", "ap2m1a", "m6pr", "clta", "ap2s1", "gbf1", "krt18a.1", "clcn3", "rab5aa", "atp6v1h", "vps4b", "arf1", "lamp2", "scamp1", "uso1", "ocrl", "cltcb", "ap1g1", "vamp3", "arfgef1", "tmed2", "abca1a", "atp7a", "stx12", "copb2", "abca1b", "scamp3", "rps6ka3b", "pam", "arfgef2", "tsg101a", "copb1", "atp6v1ba"…	Down-regulated
45	HALLMARK_DNA_REPAIR	1.22517e-29	1.02098e-28	1.41728	-0.466687	-6.69826	136	c("rbx1", "sdcbp2", "dad1", "taf13", "bcap31", "dctn4", "tp53", "alyref", "gtf2a2", "nme3", "taf10", "upf3b", "cox17", "pde4ba", "gtf2b", "tmed2", "taf12", "adrm1", "polr2a", "polr2d", "ncbp2", "taf9", "pcna", "nudt21", "sf3a3", "pole4", "smad5", "tsg101a", "vps28", "ago4", "nme4", "cstf3", "polr2i", "taf6", "cant1a", "ralaa", "dgcr8", "rae1", "ddb1", "polr2h", "dut", "rpa3", "nt5c3a", "rpa2", "r…	Down-regulated
46	HALLMARK_MYC_TARGETS_V1	6.34908e-34	6.34908e-33	1.51611	-0.418859	-7.245	200	c("ppiab", "psmb3", "ppiaa", "psma1", "snrpg", "canx", "ran", "ube2l3b", "psmd7", "vdac1", "cox5aa", "psmb2", "psmc4", "prdx3", "eif4g2a", "psmd3", "snrpd1", "psma6b", "psmd1", "psmd8", "cct7", "cct3", "etf1b", "srsf3b", "psma8", "psma4", "slc25a3b", "hdac1", "eif4a1a", "ywhae1", "snrpd2", "cbx3a", "ywhaqb", "snrpd3l", "ube2e1", "psmd14", "hnrnpa1a", "hnrnpub", "vdac3", "snrpb2", "eif4g2b", "srsf…	Down-regulated
47	HALLMARK_E2F_TARGETS	1.43171e-38	2.38618e-37	1.6153	-0.443868	-7.63915	199	c("hmgb2a", "ddx39aa", "ran", "hmga1a", "ilf3b", "tubb5", "smc1al", "tp53", "snrpb", "hmgb3a", "cbx5", "srsf2a", "nop56", "pop7", "pa2g4b", "srsf1a", "naa38", "psip1a", "syncrip", "pcna", "nudt21", "pole4", "rbb4l", "ctcf", "dek", "prps1b", "ipo7", "pds5b", "smc3", "timeless", "dut", "ranbp1", "hnrnpd", "rpa3", "cnot9", "rpa2", "mycb", "asf1bb", "ube2s", "cse1l", "rpa1", "slbp", "nap1l1", "lmnb1"…	Down-regulated
48	HALLMARK_MITOTIC_SPINDLE	7.4017e-38	9.25212e-37	1.60243	-0.444375	-7.69405	195	c("gsna", "pxnb", "actn4", "tuba8l4", "myh9b", "sptan1", "flna", "cdc42", "sptbn1", "apc", "tuba8l3", "pdlim5b", "trioa", "cdc42ep4b", "rasal2", "rabgap1", "kif1b", "bcl2l11", "smc1al", "notch2", "arhgef2", "ywhae1", "itsn1", "fscn1a", "mapre1b", "capzb", "pafah1b1a", "myh10", "arhgdia", "ralbp1", "tiam1b", "wasla", "farp1", "arfgef1", "arhgap29a", "arhgap10", "rasa1a", "cd2ap", "abl1", "dock4b",…	Down-regulated
49	HALLMARK_G2M_CHECKPOINT	1.11511e-39	2.78777e-38	1.64074	-0.45612	-7.85708	196	c("mt2", "hmgn2", "ddx39aa", "hist2h2l", "hmga1a", "atrx", "sfpq", "meis1b", "snrpd1", "rasal2", "ilf3b", "smc1al", "notch2", "ccnd1", "pafah1b1a", "hmgb3a", "slc7a5", "hnrnpub", "srsf2a", "smarcc1a", "bcl3", "ewsr1a", "g3bp1", "abl1", "srsf1a", "puraa", "ccnt1", "chmp1a", "syncrip", "mapk14a", "nup98", "cdc27", "ctcf", "hnrnpua", "pds5b", "kif5ba", "kpnb1", "cul1b", "upf1", "rad23b", "hnrnpd", "…	Down-regulated
50	HALLMARK_OXIDATIVE_PHOSPHORYLATION	1.06445e-45	5.32225e-44	1.76244	-0.488089	-8.42388	197	c("atp5mc1", "cox8a", "cox6a1", "uqcr10", "cox7b", "ndufa1", "cox6b1", "atp5l", "atp5pb", "slc25a5", "uqcrq", "ndufa2", "atp5fa1", "atp5mc3a", "ndufb7", "atp6v1e1b", "ndufb6", "vdac1", "cox5aa", "pora", "cox7c", "prdx3", "ndufc2", "uqcrh", "atp5pf", "cox7a2a", "suclg1", "ndufa3", "mpc1", "ndufa7", "ndufa5", "atp5f1d", "idh1", "glud1a", "timm8b", "atp6ap1b", "slc25a3b", "ogdha", "atp5f1b", "ndufs3…	Down-regulated

## Sheet: GNA11;bap1+-
	pathway	pval	padj	log2err	ES	NES	size	leadingEdge	Enrichment
1	HALLMARK_INTERFERON_GAMMA_RESPONSE	2.13528e-29	5.3382e-28	1.40995	0.473216	6.30577	144	c("b2m", "cd74a", "mt2", "rnf213a", "psme2", "psme1", "psmb8a", "tnfaip2a", "tnfaip3", "stat2", "cd40", "psmb2", "vcam1b", "socs3b", "lats2", "irf1b", "nfkbiaa", "arid5b", "irf2", "ifi30", "txnipa", "vamp5", "psmb9a", "stat1a", "auts2a", "casp8", "trim25", "mxc", "pim1", "psmb10", "znfx1", "tapbp.1", "stat3", "mxb", "sri", "dhx58", "parp12a", "tap1", "mxa", "irf7", "irf9", "si:ch211-71m22.1", "ps…	Up-regulated
2	HALLMARK_INTERFERON_ALPHA_RESPONSE	3.65164e-18	3.04303e-17	1.09593	0.55411	5.03769	64	c("b2m", "cd74a", "psme2", "psme1", "psmb8a", "stat2", "elf1", "irf1b", "irf2", "uba7", "ifi30", "txnipa", "mov10b.1", "psmb9a", "casp8", "trim25", "mxc", "mxb", "dhx58", "parp12a", "cnp", "tap1", "mxa", "irf7", "irf9", "si:ch211-71m22.1", "psma3", "parp9", "ifi35", "cxcl11.1", "epsti1", "mvb12a", "tdrd7b", "ifit11", "eif2ak2", "rsad2", "cmpk2", "ifih1", "mxe", "adar", "trafd1", "cmtr1", "ripk2",…	Up-regulated
3	HALLMARK_TNFA_SIGNALING_VIA_NFKB	8.58895e-18	6.13496e-17	1.08644	0.339197	4.97808	175	c("stat5a", "ehd1b", "phlda2", "serpinb1l1", "tnfaip2a", "tnfaip3", "sgk1", "jun", "hbegfa", "junba", "tnip1", "dennd5a", "hbegfb", "klf6a", "gadd45bb", "socs3b", "irf1b", "nfkbiaa", "egr1", "pdlim5b", "rcan1a", "atp2b1a", "tsc22d1", "tiparp", "bcl3", "btg2", "ier2b", "nfkb2", "id2a", "abca1b", "ccnd1", "ccl20b", "sdc4", "ccl35.1", "nfil3", "fosab", "nfe2l2a", "cd83", "tap1", "ier5", "ackr3b", "c…	Up-regulated
4	HALLMARK_UV_RESPONSE_DN	4.07272e-17	2.54545e-16	1.06721	0.379424	4.96208	139	c("mt2", "fhl2a", "igfbp5b", "rxraa", "tjp1a", "dlc1", "atxn1a", "pmp22b", "anxa4", "prkceb", "apbb2b", "ptpn21", "nr3c1", "erbb2", "cdon", "atrx", "pdlim5b", "zmiz1a", "notch2", "itgb3b", "mgll", "atp2b1a", "tgfbr3", "lamc1", "celf2", "abcc1", "spop", "igf1ra", "sri", "pik3r3b", "fzd2", "rnd3a", "akt3a", "prkcaa", "insig1", "atrn", "col1a1a", "bhlhe40", "kalrnb", "nek7", "acvr2aa", "sipa1l1", "n…	Up-regulated
5	HALLMARK_APICAL_JUNCTION	4.4287e-16	2.01305e-15	1.0377	0.328829	4.88936	179	c("thy1", "actb1", "cnn2", "pfn1", "cd99", "tjp1a", "actn4", "myh9b", "vcam1b", "arpc2", "tspan4a", "gnai1", "zyx", "pik3cb", "src", "nlgn2a", "msna", "pard6gb", "mmp2", "myl9b", "rsu1", "cadm3", "itgb4", "skap2", "shc1", "arhgef6", "fscn1a", "pik3r3b", "ywhah", "ctnna1", "ctnnd1", "akt3a", "insig1", "flncb", "rasa1a", "ptk2ab", "myh10", "cap1", "cd276", "itga9", "itga10", "pkd1a", "si:ch73-22o12…	Up-regulated
6	HALLMARK_TGF_BETA_SIGNALING	1.41778e-16	7.08891e-16	1.04763	0.586505	4.63947	49	c("fkbp1aa", "tjp1a", "junba", "hipk2", "fkbp1ab", "rhoab", "ncor2", "ctnnb1", "slc20a1b", "apc", "sptbn1", "skila", "id2a", "thbs1b", "xiap", "hdac1", "smurf2", "bmpr2b", "cdh1", "skia", "tjp1b", "smad7", "ppp1r15a", "cdk9", "tgfb1a", "trim33", "wwtr1", "smad6b", "smad1", "smad3a", "acvr1l", "ppm1aa", "ube2d3", "smurf1", "bmpr1aa")	Up-regulated
7	HALLMARK_ALLOGRAFT_REJECTION	6.81361e-15	2.839e-14	0.996986	0.332171	4.56645	154	c("mhc1uba", "b2m", "cd74a", "mhc1zba", "thy1", "galnt1", "rpl39", "eif5a2", "socs5b", "flna", "rps9", "cd40", "elf1", "rps19", "ccl19a.1", "stat1a", "ube2na", "psmb10", "bcl3", "tapbp.1", "ctss2.1", "ccl35.1", "ube2d1b", "mhc1zfa", "ly75", "tap1", "ets1", "itgb2", "irf7", "ccl35.2", "tap2a", "ifngr1l", "acvr2aa", "tgfb2", "ptprc", "eif4g3a", "prkcbb", "csk", "ptpn6", "srgn", "wasb", "ikbkb", "tg…	Up-regulated
8	HALLMARK_PROTEIN_SECRETION	7.38512e-14	2.84043e-13	0.954542	0.411713	4.41779	92	c("cd63", "krt18a.1", "sod1", "rab2a", "adam10a", "ppt1", "gbf1", "kif1b", "cltca", "rab5aa", "abca1b", "arf1", "ocrl", "scamp1", "arfip1", "rer1", "ctsc", "m6pr", "snx2", "atp6v1h", "uso1", "ap2m1a", "vps4b", "lamp2", "abca1a", "clta", "copb2", "rps6ka3b", "vamp3", "tmed2", "clcn3", "golga4", "cltcb", "lman1", "ap1g1", "ap2s1", "cln5", "scamp3", "sec31a", "pam", "arfgef2", "sec24d", "cope", "zw1…	Up-regulated
9	HALLMARK_MITOTIC_SPINDLE	2.98459e-12	9.94864e-12	0.898671	0.274719	4.18139	195	c("gsna", "pxnb", "actn4", "myh9b", "flna", "bcl2l11", "tuba8l4", "rasal2", "sptan1", "cdc42ep4b", "cdc42", "pdlim5b", "apc", "notch2", "trioa", "kif1b", "arhgef2", "sptbn1", "itsn1", "rabgap1", "farp1", "sorbs2b", "fscn1a", "cdk5rap2", "tuba8l3", "arhgap29a", "ralbp1", "ywhae1", "dock4b", "mid1ip1b", "arhgap4b", "rasa1a", "clip2", "myh10", "clasp1a", "arhgap10", "smc1al", "tiam1b", "abl1", "cep1…	Up-regulated
10	HALLMARK_APOPTOSIS	1.02885e-11	3.21515e-11	0.875325	0.308256	4.10034	142	c("clu", "gsna", "gpx3", "timp2a", "krt18a.1", "sod1", "hmgb2a", "jun", "bcl2l11", "bcap31", "sptan1", "gadd45bb", "irf1b", "erbb2", "ppt1", "ctnnb1", "slc20a1b", "txnipa", "mmp2", "bcl2l10", "casp8", "tgfbr3", "hmox1a", "btg2", "lgals3a", "add1", "ccnd1", "bnip3lb", "pdcd4b", "raraa", "xiap", "tap1", "ptk2ab", "ifngr1l", "igfbp6b", "etf1b", "ppp3r1b", "birc2", "cflara", "tgfb2", "dap", "casp7", …	Up-regulated
11	HALLMARK_PI3K_AKT_MTOR_SIGNALING	2.76024e-11	8.11836e-11	0.863415	0.342476	3.97162	108	c("arpc3", "pfn1", "cfl1", "ywhabb", "stat2", "ywhaba", "hsp90b1", "actr2b", "grb2b", "ube2na", "rac1a", "cltca", "cab39l", "tnfrsf1a", "arf1", "pik3r3b", "smad2", "eif4eb", "tsc2", "ap2m1a", "tiam1b", "grk3", "rps6ka3b", "prkar2aa", "rptor", "prkcbb", "cltcb", "ppp2r1bb", "cdkn1ba", "them4", "cdkn1a", "map2k6", "ube2d3", "ube2nb", "calr", "pla2g12a", "si:ch1073-140o9.2", "rps6ka1", "mapk9", "myd…	Up-regulated
12	HALLMARK_HEME_METABOLISM	9.28945e-10	2.44459e-09	0.801216	0.254258	3.77537	176	c("myl4", "aqp3a", "ucp2", "acsl1a", "tns1b", "clic2", "sdcbp2", "ctsba", "cast", "nr3c1", "sptan1", "bsg", "btg2", "lrp10", "add1", "bnip3lb", "mboat2a", "rbm5", "nfe2l1b", "mxi1", "dmtn", "lamp2", "tmem9b", "atp6v0a1a", "mark3a", "nek7", "gapvd1", "ell2", "fbxo9", "igsf3", "kat2b", "rnf19a", "urod", "rnf123", "clcn3", "picalma", "cdc27", "tcea1", "si:dkey-237i9.1", "mkrn1", "htatip2", "lpin2", …	Up-regulated
13	HALLMARK_EPITHELIAL_MESENCHYMAL_TRANSITION	8.25092e-09	1.96451e-08	0.74774	0.239781	3.56772	178	c("vim", "thy1", "efemp2a", "mfap5", "col4a1", "loxl2b", "serpine2", "col4a2", "fstl1b", "tpm1", "pmp22b", "tnfaip3", "jun", "flna", "tpm4a", "hbegfb", "vcam1b", "gadd45bb", "fermt2", "pdlim4", "notch2", "emp3b", "itgb3b", "mmp2", "myl9b", "mylkb", "tgfbr3", "gpc1b", "plod3", "lamc1", "id2a", "serpinh1a", "sdc4", "thbs1b", "col6a3", "sntb1", "copa", "col1a1a", "plod1a", "itgav", "vegfaa", "spock1…	Up-regulated
14	HALLMARK_HYPOXIA	6.61174e-09	1.65294e-08	0.761461	0.230966	3.53447	198	c("icn", "glrx", "mt2", "akap12b", "gpc4", "chst2a", "cavin2b", "myh9b", "tnfaip3", "wsb1", "jun", "nr3c1", "mif", "rbpjb", "klf6a", "nedd4l", "hs3st1l2", "pim1", "tiparp", "hmox1a", "gpc1b", "slc6a6b", "cavin1b", "sdc4", "bnip3lb", "gapdh", "nfil3", "fosab", "mxi1", "prkcaa", "znf292a", "ackr3b", "ets1", "prdx5", "adma", "ext1a", "gapdhs", "hdlbpa", "vegfaa", "bhlhe40", "rragd", "btg1", "kdm3b",…	Up-regulated
15	HALLMARK_P53_PATHWAY	5.64097e-08	1.2263e-07	0.719513	0.229178	3.44695	182	c("icn", "ccng1", "rps27l", "zbtb16a", "cd81a", "rxraa", "fbxw7", "s100a10b", "stom", "phlda3", "jun", "hbegfa", "tp53", "hbegfb", "dgkaa", "sesn1", "ifi30", "txnipa", "tsc22d1", "abcc5", "hmox1a", "itgb4", "btg2", "ctsf", "mdm2", "vdrb", "hexim1", "fosab", "kif13ba", "tap1", "ier5", "ctsd", "tax1bp3", "csrnp2", "btg1", "gm2a", "traf4a", "tm7sf3", "cyfip2", "tob1a", "ei24", "zmat3", "ppp1r15a", "…	Up-regulated
16	HALLMARK_ANDROGEN_RESPONSE	3.39587e-08	7.71789e-08	0.719513	0.303519	3.35676	98	c("mhc1uba", "b2m", "plpp1a", "akap12b", "myl12.1", "sgk1", "ptpn21", "arid5b", "spcs3", "pdlim5b", "zmiz1a", "tsc22d1", "ccnd1", "tmem50a", "insig1", "itgav", "acsl3b", "ell2", "rps6ka3b", "cdk6", "cdc14b", "abhd2a", "appbp2", "slc38a2", "lman1", "myl12.2", "ncoa4", "srp19", "herc3", "sec24d", "srfa", "adrm1", "ube2ia", "zbtb10", "pias1b", "dnajb9a", "gsr", "stk39", "ankhb", "actn1", "homer2", "…	Up-regulated
17	HALLMARK_ADIPOGENESIS	1.89593e-07	3.94984e-07	0.690132	0.214048	3.27113	196	c("gpx3", "ucp2", "col4a1", "stat5a", "cox8a", "cd151l", "uqcr10", "cavin2b", "cox6a1", "sod1", "stom", "pora", "uqcrq", "cox7b", "prdx3", "ndufb7", "ndufa5", "lipeb", "mgll", "sorbs1", "aplp2", "mylkb", "itsn1", "fah", "gphna", "abca1b", "cavin1b", "adipor2", "nabp1a", "agpat3", "lpl", "phldb1b", "atp1b3a", "acadm", "pdcd4b", "suclg1", "rnf11b", "ddt", "ifngr1l", "abca1a", "lama4", "fzd4", "esyt…	Up-regulated
18	HALLMARK_IL2_STAT5_SIGNALING	4.42399e-07	8.84798e-07	0.674963	0.214548	3.14872	175	c("ahnak", "pleca", "cd81a", "plpp1a", "gabarapb", "anxa4", "dennd5a", "hipk2", "wls", "klf6a", "gadd45bb", "spred2b", "pim1", "huwe1", "fah", "cyfip1", "hopx", "igf1ra", "enpp1", "nfil3", "cd83", "mapkapk2a", "si:ch211-71m22.1", "twsg1a", "itgav", "ifngr1l", "tnfrsf9a", "cdc42se2", "bhlhe40", "cxcl11.1", "rragd", "tiam1b", "alcamb", "bmpr2b", "ncoa3", "bcl2l1", "rabgap1l", "nrp1a", "swap70b", "p…	Up-regulated
19	HALLMARK_REACTIVE_OXYGEN_SPECIES_PATHWAY	2.47064e-06	4.75123e-06	0.627257	0.394175	2.97054	45	c("glrx", "gpx3", "sod1", "junba", "stk25b", "pdlim1", "oxsr1b", "txn", "abcc1", "atox1", "lamtor5", "mbpb", "gclm", "ndufs2", "ndufb4", "selenos", "sbno2a", "pfkpb", "egln2", "gsr", "hmox2b", "gclc", "zgc:56095", "srxn1", "glrx2", "scaf4a")	Up-regulated
20	HALLMARK_UNFOLDED_PROTEIN_RESPONSE	4.70749e-06	8.71757e-06	0.610527	0.250259	2.96013	112	c("zbtb17", "banf1", "atf4b", "sec11a", "spcs3", "eif4ebp1", "hsp90b1", "cnot6a", "shc1", "spcs1", "fkbp14", "nabp1a", "atf4a", "eif4eb", "herpud1", "vegfaa", "hyou1", "yif1a", "eif4g1a", "CABZ01080568.1", "ifit11", "ttc37", "eif4a1b", "eif2ak3", "dcp2", "arfgap1", "sec31a", "lsm4", "cnot4b", "srpra", "slc7a5", "eif4a1a", "calr", "nfya", "cnot2", "dnajb9a", "lsm1", "eif4a2", "ssr1", "parn", "wfs1…	Up-regulated
21	HALLMARK_COMPLEMENT	7.10416e-06	1.2686e-05	0.610527	0.203278	2.92905	168	c("clu", "anxa5b", "mt2", "calm2a", "timp2a", "pfn1", "col4a2", "ehd1b", "pik3ca", "tnfaip3", "ctsba", "irf1b", "mmp15b", "irf2", "src", "grb2b", "psmb9a", "pim1", "csrp1a", "lgals3a", "hsp70l", "atox1", "ctss2.1", "ppp2cb", "ctsc", "dock4b", "ctsd", "irf7", "si:ch211-71m22.1", "lamp2", "cblb", "c1qc", "casp7", "fcer1g", "adam9", "gnai2b", "erap2", "c1qa", "gnb2", "vcpip1", "wasb", "calm3a", "gnb…	Up-regulated
22	HALLMARK_UV_RESPONSE_UP	4.65235e-05	7.75392e-05	0.557332	0.197518	2.78484	161	c("aqp3a", "gpx3", "dnajb1b", "junba", "bcl2l11", "stk25b", "tuba8l4", "irf1b", "nfkbiaa", "ppt1", "bsg", "selenow1", "hmox1a", "btg2", "tuba8l3", "arrb2b", "fosab", "cnp", "tap1", "psmc3", "cdo1", "btg1", "tegt", "rab27a", "creg1", "pdlim3b", "bida", "hnrnpub", "urod", "dnaja1", "dlg4a", "prkacab", "ap2s1", "sult1st1", "cltb", "plcl1", "il6st", "acaa1", "rpn1", "nr4a1", "mark2a", "fosb", "cdkn2a…	Up-regulated
23	HALLMARK_NOTCH_SIGNALING	1.12988e-05	1.94808e-05	0.593325	0.462284	2.76527	28	c("lfng", "rbx1", "skp1", "notch2", "tcf7l2", "ccnd1", "prkcaa", "fbxw11b", "heyl", "fzd7b", "psenen", "dtx4b", "jag1b", "aph1b", "ppardb", "cul1b", "kat2a", "arrb1", "fzd1", "dtx2", "fzd5", "notch1b")	Up-regulated
24	HALLMARK_MYOGENESIS	5.39725e-05	8.70524e-05	0.557332	0.172081	2.60009	187	c("clu", "myl4", "gsna", "gpx3", "mef2cb", "acsl1a", "col4a2", "myh9b", "cox6a1", "gabarapl2", "hbegfa", "hdac5", "myl6", "hbegfb", "sptan1", "gadd45bb", "mef2d", "gnao1a", "sorbs1", "tpm3", "pdlim7", "mylkb", "itgb4", "ncam1a", "atp2a1", "col6a3", "agrn", "col1a1a", "tsc2", "bhlhe40", "camk2b1", "sh2b1", "mef2aa", "fdps", "atp6ap1b", "fkbp1b", "sgcd", "kifc3", "schip1", "ppfia4", "tgfb1a", "mybp…	Up-regulated
25	HALLMARK_WNT_BETA_CATENIN_SIGNALING	6.03737e-05	9.43339e-05	0.557332	0.3579	2.57222	41	c("tp53", "hdac5", "rbpjb", "gnai1", "ncor2", "ctnnb1", "hdac1", "dvl2", "jag1b", "gbp", "ccnd2a", "ptch1", "maml1", "numb", "hdac11", "ppardb", "cul1b", "CABZ01110881.1", "mycb", "fzd8a", "tcf7", "kat2a", "nkd1", "fzd1", "wnt1", "wnt6b", "notch1b", "axin2", "dkk1b")	Up-regulated
26	HALLMARK_FATTY_ACID_METABOLISM	0.000112009	0.000169711	0.538434	0.193181	2.56994	143	c("acsl1a", "psme1", "s100a10b", "gabarapb", "acsl4a", "ostc", "mif", "mdh1aa", "mgll", "ptprga", "serinc1", "adipor2", "adsl", "aldh9a1a.1", "aldh3a2b", "ywhah", "acadm", "suclg1", "gapdhs", "suclg2", "acadvl", "hsp90aa1.2", "idh1", "urod", "tp53inp2", "gpd1a", "cryz", "apex1", "acaa1", "idh3b", "cbr1", "bckdhb", "hsdl2", "acox1", "pcbd1", "hsph1", "eci1", "nthl1", "dldh", "gcdha", "cpox", "slc2…	Up-regulated
27	HALLMARK_INFLAMMATORY_RESPONSE	0.000143404	0.000210888	0.518848	0.184286	2.563	157	c("chst2a", "hbegfa", "cd40", "hbegfb", "klf6a", "irf1b", "nfkbiaa", "emp3b", "itgb3b", "atp2b1a", "kif1b", "btg2", "tapbp.1", "abca1b", "ccl20b", "sri", "irf7", "adma", "ccl35.2", "tnfrsf9a", "pcdh7b", "abca1a", "cxcl11.1", "pde4ba", "acvr2aa", "atp2a2b", "si:ch73-22o12.1", "dcbld2", "eif2ak2", "ldlra", "rnf144b", "atp2c1", "cdkn1a", "abi1a", "ahr1b", "lcp2a", "selenos", "adrm1", "cd82a", "psen1…	Up-regulated
28	HALLMARK_GLYCOLYSIS	0.000313577	0.000447967	0.498493	0.166767	2.53486	191	c("glrx", "ppiab", "gpc4", "chst2a", "sod1", "ppiaa", "mif", "mdh1aa", "pkma", "psmc4", "txn", "gpc1b", "aldh9a1a.1", "ppp2cb", "mxi1", "agrn", "znf292a", "ext1a", "plod1a", "gfpt1", "gapdhs", "hdlbpa", "vegfaa", "rragd", "rbck1", "copb2", "ndufv3", "qsox1", "idh1", "pgam1b", "pgam1a", "ppfia4", "pam", "chst6", "agla", "hs6st2", "tpst1", "gne", "pfkpb", "ext2", "irs2a", "dsc2l", "ankzf1", "tpbgb"…	Up-regulated
29	HALLMARK_ESTROGEN_RESPONSE_EARLY	0.000420688	0.000584289	0.498493	0.162165	2.42672	180	c("aqp3a", "tmprss3a", "fhl2a", "tfap2c", "dlc1", "krt18a.1", "mlpha", "elf1", "hbegfb", "ncor2", "celsr1b", "rarres3l", "tiparp", "farp1", "ccnd1", "igf1ra", "wwc1", "fosab", "raraa", "abca3b", "ttc39a", "fam102ab", "kaznb", "bhlhe40", "rarres3", "ugcg", "tiam1b", "cyp26b1", "deptor", "gab2", "pdlim3b", "tob1a", "abhd2a", "amfra", "papss2b", "siah2l", "add3a", "il6st", "isg20l2", "adamtsl7", "mp…	Up-regulated
30	HALLMARK_IL6_JAK_STAT3_SIGNALING	0.00104007	0.00136852	0.45506	0.25354	2.30506	64	c("jun", "stat2", "socs3b", "irf1b", "crfb4", "cntfr", "itgb3b", "grb2b", "stat1a", "pim1", "hmox1a", "tnfrsf1a", "stat3", "irf9", "ifngr1l", "cxcl11.1", "tyk2", "cbl", "tgfb1a", "il6st", "csf2rb", "myd88", "acvrl1", "socs3a", "il2rga", "stam2", "zmp:0000000936", "cxcl11.6", "map3k8")	Up-regulated
31	HALLMARK_HEDGEHOG_SIGNALING	0.00224108	0.00287318	0.431708	0.333036	2.2438	35	c("thy1", "myh9b", "cntfr", "celsr1b", "dpysl2b", "amot", "rasa1a", "vegfaa", "nf1b", "cdk6", "nrp1a", "slit1a", "ptch1", "ldb1a", "celsr1a", "ophn1", "tle3b")	Up-regulated
32	HALLMARK_KRAS_SIGNALING_UP	0.00241163	0.00301454	0.431708	0.148824	2.14442	168	c("glrx", "akap12b", "psmb8a", "tnfaip3", "hbegfa", "hbegfb", "gadd45ga", "cab39l", "ammecr1", "id2a", "ctss2.1", "ccl20b", "ets1", "itgb2", "cxcl11.1", "igf2b", "adgrl4", "gfpt2", "rbm4.2", "birc2", "si:dkeyp-82a1.6", "rbm4.1", "map3k1", "dcbld2", "fcer1g", "rabgap1l", "f13a1b", "nrp1a", "evi5b", "si:ch211-241b2.5", "ppp1r15a", "cbl", "laptm5", "traf1", "mtmr10", "ccnd2a", "irf8", "atg10", "strn…	Up-regulated
33	HALLMARK_CHOLESTEROL_HOMEOSTASIS	0.0087825	0.0107104	0.38073	0.203314	1.925	69	c("clu", "anxa5b", "actb1", "gnai1", "ctnnb1", "lgals3a", "nfil3", "lpl", "si:ch211-71m22.1", "alcamb", "cpeb2", "fdps", "gstm.2", "jag1b", "ldlra", "tp53inp1", "anxa13", "ethe1", "atxn2", "mvda", "gpx8", "tm7sf2", "acss2", "s100a11", "srebf2")	Up-regulated
34	HALLMARK_PEROXISOME	0.0158192	0.0183944	0.352488	0.172832	1.90162	97	c("acsl1a", "atxn1a", "sod1", "acsl4a", "crabp2b", "hsd11b2", "abcc5", "aldh9a1a.1", "ywhah", "crabp2a", "prdx5", "vps4b", "mvp", "fdps", "idh1", "smarcc1a", "cadm1a", "dlg4a", "acaa1", "ide", "pex14", "nr1i2", "acox1", "siah1", "crata", "hao2", "slc35b2", "pex5", "hrasb", "fis1", "cacna1ba", "cdk7", "scp2a", "sts", "cln8", "dio1", "slc25a17", "cat", "ercc3", "elovl5")	Up-regulated
35	HALLMARK_ESTROGEN_RESPONSE_LATE	0.0189332	0.021515	0.352488	0.126945	1.84757	171	c("tmprss3a", "tfap2c", "sgk1", "hbegfb", "ncor2", "emp2", "rarres3l", "farp1", "cxcl14", "id2a", "ccnd1", "plxnb1b", "aldh3a2b", "fosab", "pdcd4b", "abca3b", "fam102ab", "dlg5a", "jak1", "rarres3", "tiam1b", "cyp26b1", "dnajc1", "cdh1", "pdlim3b", "tob1a", "abhd2a", "rabep1", "amfra", "papss2b", "ptpn6", "siah2l", "add3a", "il6st", "pkp3b", "cish", "slc7a5", "dusp2", "btg3", "cox6c", "tpbgb", "j…	Up-regulated
36	HALLMARK_ANGIOGENESIS	0.0137341	0.0163502	0.38073	0.281956	1.76898	30	c("icn", "fstl1b", "lpl", "ptk2ab", "itgav", "vegfaa", "slco2a1", "nrp1a", "jag1b", "ccnd2a", "appb")	Up-regulated
37	HALLMARK_XENOBIOTIC_METABOLISM	0.0484115	0.0526212	0.252961	0.105897	1.60226	186	c("mt2", "gabarapb", "pora", "cndp2", "pdlim5b", "ndrg2", "pgrmc1", "psmb10", "hmox1a", "tnfrsf1a", "fah", "slc6a6b", "id2a", "aldh9a1a.1", "aox6", "ddt", "slc12a4", "cdo1", "tegt", "atp2a2b", "man1a1", "tgfb2", "idh1", "cyfip2", "bcar1", "pgd", "nmt1a", "gstm.2", "papss2b", "lpin2", "sar1b", "slc35b1", "irf8", "ddc", "cbr1", "tpst1", "upp1", "tkfc", "acox1", "mthfd1b", "jupb", "acox3", "gsr", "a…	Up-regulated
38	HALLMARK_APICAL_SURFACE	0.0540541	0.0575043	0.261664	0.227416	1.53219	35	c("thy1", "afap1l2", "crybg1a", "adam10a", "sulf2b", "adipor2", "flot2a", "dcbld2", "gstm.2", "appb", "il2rga", "ephb4b", "atp8b1", "mdga1", "gata3", "b4galt1l")	Up-regulated
39	HALLMARK_KRAS_SIGNALING_DN	0.0926518	0.0945426	0.184706	0.103526	1.43981	157	c("zbtb16a", "lfng", "pax3a", "sox10", "chst2a", "sgk1", "efhd1", "hsd11b2", "cntfr", "arhgdig", "mxc", "btg2", "skila", "tcf7l1a", "cpeb3", "mxb", "ypel1", "mxa", "gdnfa", "copz2", "ccr8.1", "pcdh1g1", "vps50", "tgfb2", "thrb")	Up-regulated
40	HALLMARK_BILE_ACID_METABOLISM	0.124365	0.124365	0.202072	-0.113562	-1.36735	102	c("optn", "abcd3a", "pex7", "gnmt", "ephx2", "pex19", "idi1", "idh2", "fdxr", "cyp46a1.2", "zgc:158482", "slc23a2", "mlycd", "phyh", "isoc1", "gnpat", "slc22a18", "ar", "fads2", "nr1h4", "pex11a", "pex13", "lck", "dhcr24", "gstk1", "rxrgb", "abca2", "pfkma", "ch25h", "pxmp2", "lonp2", "hao1", "bbox1", "efhc1", "pex6", "sult2st3", "cyp46a1.3", "pecr", "hsd17b4", "hsd3b7", "aqp9b")	Down-regulated
41	HALLMARK_PANCREAS_BETA_CELLS	0.0581655	0.0605891	0.282013	-0.20899	-1.50996	35	c("srprb", "srp9", "hnf1a", "syt13", "mafba", "pcsk1", "srp14", "elp4", "pdx1", "chga", "gcga", "sst1.1", "neurog3", "pcsk2", "gck", "abcc8", "nkx6.1", "pak1", "pax4", "nkx2.2a", "foxa2", "insm1a", "pax6b")	Down-regulated
42	HALLMARK_COAGULATION	0.0340709	0.0378565	0.321776	-0.135826	-1.71414	116	c("ctsla", "dct", "anxa1a", "crip2", "fbn2b", "mmp14b", "pef1", "klf7a", "wdr1", "maff", "iscub", "plat", "cd9a", "serpine1", "s100v2", "fynb", "sparc", "cfd", "cxcl8a", "mst1", "casp9", "prep", "lgmn", "mmp13a", "mmp9", "hmgcs1", "f10", "apoc1", "f3a", "lta4h", "plg", "dusp6", "fn1a", "dusp14", "gda", "c3a.1", "ctsh", "arf4a", "cpb2", "sirt2", "si:ch211-212c13.10")	Down-regulated
43	HALLMARK_SPERMATOGENESIS	0.000679004	0.000917573	0.477271	-0.186294	-2.35105	116	c("ldha", "rfc4", "pgk1", "cdk1", "tktb", "papola", "naa10", "ncaph", "map7a", "jam3b", "ttk", "coil", "kif2c", "mlf1", "bub1", "slc12a2", "alox12", "tsn", "dmrt1", "aurka", "ezh2", "pgs1", "dbf4", "cct6a", "pdha1b", "nek2", "si:ch211-113a14.18", "si:dkey-108k21.10", "topbp1", "zc3h14", "zgc:110425", "nphp1", "arl4aa", "csnk2a2b", "zgc:163061", "hspa4l", "pebp1", "parp2", "si:ch211-113a14.24", "c…	Down-regulated
44	HALLMARK_DNA_REPAIR	1.61391e-10	4.48307e-10	0.826657	-0.28462	-3.92674	136	c("arl6ip1", "edf1", "polr2eb", "guk1a", "polr2f", "polr1d", "pnp5a", "rfc4", "gtf2h5", "supt4h1", "gpx4b", "polr2c", "polr2j", "aaas", "polr1c", "rpa3", "aprt", "rpa2", "ak1", "nme4", "ddb2", "sec61a1", "gtf2f1", "pola1", "eloa", "ralaa", "ak3", "snapc5", "rad51", "ercc1", "umps", "dut", "itpa", "tyms", "lig1", "rfc5", "tk2", "fen1", "mrpl40", "pold1", "pola2", "rfc3", "rnmt", "clp1", "nelfe", "…	Down-regulated
45	HALLMARK_MTORC1_SIGNALING	2.29445e-13	8.19445e-13	0.932595	-0.256433	-4.29199	204	c("eif2s2", "eno1a", "sqstm1", "hspe1", "prdx1", "hspd1", "pdap1b", "slc1a5", "hspa9", "ddx39ab", "ddit3", "pnp5a", "ldha", "tpi1b", "rrp9", "xbp1", "ppa1b", "psmd13", "phgdh", "wars", "atp6v1d", "cth", "pgk1", "psat1", "psme3", "hmgcra", "psph", "mcm4", "arpc5lb", "uchl5", "hspa5", "trib3", "hk2", "gpia", "psmc6", "rit1", "ddit4", "mcm2", "egln3", "dhfr", "mthfd2", "cd9a", "ebp", "srd5a1", "zgc:…	Down-regulated
46	HALLMARK_OXIDATIVE_PHOSPHORYLATION	5.45769e-17	3.03205e-16	1.06721	-0.297951	-4.93392	197	c("alas1", "atp1b1a", "atp5f1e", "vdac2", "atp5pd", "ldhba", "mgst3a", "baxa", "atp5mf", "hspa9", "ndufa6", "atp6v0cb", "cyc1", "timm9", "polr2f", "sdhb", "atp6v1g1", "timm17a", "ldha", "cycsb", "hccsb", "atp5po", "atp5mc3b", "tomm70a", "dlst", "aldh6a1", "mrpl15", "atp6v1d", "pdhx", "grpel1", "cs", "gpx4b", "phb2b", "aco2", "pdhb", "ndufb8", "tomm22", "cox4i1", "uqcrc2b", "nqo1", "sdha", "acaa2"…	Down-regulated
47	HALLMARK_MYC_TARGETS_V1	5.73056e-26	5.73056e-25	1.31889	-0.374997	-6.25478	200	c("rplp0", "rpl14", "hsp90ab1", "rpl22", "rps3", "rps10", "rack1", "rps5", "rps6", "c1qbp", "rpl18", "cnbpb", "rsl1d1", "eif2s2", "serbp1a", "eif2s1b", "eif3ba", "npm1a", "hspe1", "glo1", "gnl3", "hspd1", "cct2", "cct5", "mrpl23", "rpl6", "ddx21", "cyc1", "ddx18", "erh", "mrps18b", "cad", "tufm", "ldha", "pwp1", "eif1axb", "cnbpa", "rrp9", "tcp1", "fbl", "pabpc4", "tomm70a", "rfc4", "phb", "pgk1"…	Down-regulated
48	HALLMARK_MYC_TARGETS_V2	1.15679e-26	1.44598e-25	1.34223	-0.682718	-6.29615	58	c("farsa", "npm1a", "hspe1", "wdr43", "gnl3", "hspd1", "bysl", "mybbp1a", "mrto4", "rcl1", "ppan", "ddx18", "rrp9", "pes", "mphosph10", "tfb2m", "nip7", "ndufaf4", "phb", "imp4", "mcm4", "aimp2", "exosc5", "hk2", "pprc1", "nop2", "cdk4", "nolc1", "rrp12", "mcm5", "pa2g4b", "las1l", "srm", "tmem97", "grwd1", "utp20", "sord", "noc4l", "slc19a1", "plk4", "tbrg4", "plk1", "nop16", "supv3l1", "slc29a2…	Down-regulated
49	HALLMARK_G2M_CHECKPOINT	9.2512e-28	1.54187e-26	1.36518	-0.382292	-6.31029	196	c("atf5b", "ncl", "cdkn1bb", "ddx39ab", "birc5a", "chaf1a", "prc1b", "amd1", "dkc1", "hspa8", "mcm3", "stmn1b", "cdk1", "zgc:86839", "odc1", "aurkb", "kif5ba", "srsf10b", "rpa2", "xpo1b", "stmn1a", "kpnb1", "mcm6", "dtymk", "arid4a", "mcm2", "top2a", "mad2l1", "cdk4", "smc4", "nasp", "tacc3", "efna5b", "nolc1", "pbk", "kif4", "ttk", "kpna2", "mcm5", "cks1b", "hif1ab", "rbl1", "kif2c", "ndc80", "e…	Down-regulated
50	HALLMARK_E2F_TARGETS	3.90574e-42	1.95287e-40	1.69047	-0.473958	-7.86451	199	c("paics", "eif2s1b", "shmt1", "cdkn1bb", "ddx39ab", "birc5a", "pnn", "ubr7", "mcm3", "stmn1b", "lyar", "mcm4", "ranbp1", "cdk1", "zgc:86839", "ak2", "phf5a", "mcm7", "prdx4", "aurkb", "rpa3", "asf1ba", "rpa2", "psmc3ip", "xpo1b", "stmn1a", "mcm6", "nap1l1", "wee1", "mcm2", "top2a", "mad2l1", "cdk4", "anp32e", "smc4", "dnmt1", "nasp", "tacc3", "mthfd2", "nolc1", "ube2t", "kif4", "diaph3", "gins4"…	Down-regulated

## Sheet: GNA11;p53del
	pathway	pval	padj	log2err	ES	NES	size	leadingEdge	Enrichment
1	HALLMARK_MYC_TARGETS_V1	1e-50	1.25e-49	NA	0.680549	9.48333	200	c("cox5aa", "slc25a3b", "snrpg", "ywhaqb", "eif4a1a", "canx", "ran", "npm1a", "ldha", "vdac1", "snrpd1", "ppiaa", "cct7", "ywhaqa", "cct4", "psmd7", "psmc4", "cnbpa", "cct5", "pa2g4b", "etf1b", "abce1", "eif4h", "cyc1", "pabpc4", "cct3", "srsf2a", "snrpd2", "acp1", "nop16", "pgk1", "ilf2", "setb", "eif4g2a", "psmd8", "g3bp1", "ranbp1", "psmd3", "ndufab1b", "snrpa1", "hspd1", "eif3d", "psmc6", "fb…	Up-regulated
2	HALLMARK_OXIDATIVE_PHOSPHORYLATION	1e-50	1.25e-49	NA	0.682401	9.4739	197	c("cycsb", "atp5fa1", "cox5aa", "slc25a5", "uqcrfs1", "atp5mc3a", "cox7b", "cox6b1", "slc25a3b", "uqcrh", "atp5pd", "atp5f1b", "atp5mc3b", "atp5mc1", "atp5f1d", "atp5pb", "atp6v0cb", "atp5l", "suclg1", "ndufc2", "ndufs3", "ldha", "idh1", "vdac1", "uqcrc1", "atp6v1e1b", "ndufb6", "cox7a2l", "sdhb", "atp6ap1b", "mrpl11", "dldh", "ndufa7", "ndufb7", "cox6a1", "atp5po", "ndufs2", "atp5f1c", "ndufs6",…	Up-regulated
3	HALLMARK_G2M_CHECKPOINT	1e-50	1.25e-49	NA	0.559441	7.76792	196	c("mt2", "hmga1a", "hmgn2", "hmgb3a", "snrpd1", "srsf2a", "slc7a5", "atrx", "smc1al", "ncl", "pafah1b1a", "g3bp1", "kif5ba", "ewsr1a", "dkc1", "amd1", "kpnb1", "chmp1a", "srsf1a", "ddx39aa", "chaf1a", "syncrip", "rpa2", "hnrnpub", "ddx39ab", "odc1", "mapk14a", "ilf3b", "arid4a", "xpo1b", "zgc:86839", "smarcc1a", "prc1b", "nup98", "bub3", "sfpq", "ccnd1", "slc12a2", "cdk1", "ctcf", "mcm5", "lmnb1"…	Up-regulated
4	HALLMARK_E2F_TARGETS	1e-50	1.25e-49	NA	0.551594	7.70961	199	c("hmga1a", "hmgb3a", "ran", "pa2g4b", "snrpb", "srsf2a", "smc1al", "ranbp1", "hmgb2a", "nop56", "cbx5", "srsf1a", "rpa3", "ddx39aa", "syncrip", "ipo7", "rpa2", "pcna", "phf5a", "ddx39ab", "ak2", "pnn", "mcm7", "naa38", "ilf3b", "prps1b", "cnot9", "nap1l1", "dut", "lyar", "dek", "xpo1b", "zgc:86839", "cse1l", "smc3", "paics", "slbp", "timeless", "mcm4", "cdk1", "ctcf", "rpa1", "mcm5", "anp32e", "…	Up-regulated
5	HALLMARK_MTORC1_SIGNALING	5.09346e-41	5.09346e-40	1.66579	0.485371	6.79515	204	c("atp5mc1", "prdx1", "eno1a", "tuba8l3", "canx", "add3a", "ldha", "idh1", "ppiaa", "tuba8l4", "ctsc", "psmc4", "etf1b", "slc7a5", "fkbp2", "arpc5la", "pgk1", "atp6v1d", "psmd12", "psme3", "pitpnb", "cct6a", "tpi1b", "hspd1", "psmc6", "ssr1", "immt", "gpia", "cops5", "rpn1", "gmps", "uchl5", "psph", "ddx39aa", "ifrd1", "m6pr", "sec11a", "ddx39ab", "psmc2", "eif2s2", "sqstm1", "ufm1", "nmt1a", "ra…	Up-regulated
6	HALLMARK_MITOTIC_SPINDLE	1.61817e-37	1.34848e-36	1.59596	0.477078	6.59896	195	c("tuba8l3", "arhgdia", "tuba8l4", "capzb", "sptbn1", "smc1al", "mapre1b", "pafah1b1a", "kif5ba", "apc", "arfgef1", "wasf2", "arhgap5", "wasla", "cttn", "rabgap1", "ywhae1", "myh10", "cdc42", "tiam1b", "trioa", "ckap5", "sptan1", "arl8a", "prc1b", "actn4", "kif1b", "smc3", "pdlim5b", "csnk1db", "net1", "cd2ap", "pcgf5a", "cdk1", "pcnt", "map1sa", "fscn1a", "stau1", "myh9b", "ralbp1", "lmnb1", "nc…	Up-regulated
7	HALLMARK_DNA_REPAIR	6.55234e-35	4.68025e-34	1.53646	0.54119	6.37296	136	c("dctn4", "gtf2a2", "nme4", "rbx1", "polr1d", "cox17", "adrm1", "rpa3", "upf3b", "rpa2", "pcna", "ralaa", "taf12", "taf10", "polr2d", "polr2a", "dut", "alyref", "gtf2h5", "tsg101a", "polr2c", "tmed2", "ak1", "vps28", "rad51", "gtf2f1", "polr2eb", "ncbp2", "supt4h1", "fen1", "dgcr8", "pde4ba", "sdcbp2", "rae1", "taf13", "bcap31", "taf9", "polr2i", "aprt", "mrpl40", "guk1a", "polr2f", "pom121", "r…	Up-regulated
8	HALLMARK_ADIPOGENESIS	1.34331e-32	8.39569e-32	1.48157	0.443945	6.16424	196	c("cox7b", "cavin1b", "suclg1", "ndufs3", "idh1", "uqcrc1", "sdhb", "rtn3", "dldh", "ndufb7", "cox6a1", "atp5po", "uqcrq", "cs", "cyc1", "etfb", "esyt1a", "agpat3", "idh3a", "ndufab1b", "uqcr10", "aco2", "immt", "chchd10", "mtch2", "cox8a", "ak2", "aplp2", "cmpk", "nmt1a", "baz2a", "mdh2", "lpcat3", "ptcd3", "aclya", "ddt", "samm50", "coq9", "stom", "idh3g", "ccng2", "mrpl15", "riok3", "dlat", "e…	Up-regulated
9	HALLMARK_PROTEIN_SECRETION	4.70467e-29	2.6137e-28	1.40259	0.587988	5.92209	92	c("atp6v1ba", "ap2s1", "ctsc", "arfip1", "cd63", "rer1", "ap2m1a", "snx2", "clcn3", "atp7a", "clta", "adam10a", "stx12", "arfgef1", "tmed10", "ppt1", "cltcb", "m6pr", "ap1g1", "cltca", "copb1", "gnas", "vps4b", "atp6v1h", "dop1a", "tsg101a", "tmed2", "vamp3", "lamp2", "kif1b", "uso1", "sod1", "tmx1", "yipf6", "dnm1l", "anp32e", "rab2a", "napab", "ap2b1", "mapk1", "igf2r", "scamp3", "rab9a", "pam"…	Up-regulated
10	HALLMARK_UNFOLDED_PROTEIN_RESPONSE	8.48383e-22	4.24192e-21	1.20398	0.470883	5.13033	112	c("eif4a1a", "npm1a", "atp6v0d1", "spcs3", "slc7a5", "kif5ba", "dkc1", "ssr1", "banf1", "nop56", "nhp2", "spcs1", "lsm4", "sec11a", "atf4a", "eif4g1a", "khsrp", "eif4a3", "hspa9", "exoc2", "exosc1", "edem1", "calr", "fkbp14", "lsm1", "eif4a1b", "asns", "rrp9", "pdia6", "exosc10", "edc4", "exosc5", "nolc1", "cnot6a", "cks1b", "hyou1", "cnot2", "parn", "atf4b", "exosc9", "mthfd2", "nop14", "xpot", …	Up-regulated
11	HALLMARK_GLYCOLYSIS	1.94861e-19	8.11923e-19	1.14219	0.365295	4.9957	191	c("gapdhs", "eno1a", "ldha", "idh1", "ppiaa", "tktb", "mif", "dldh", "psmc4", "txn", "ugp2b", "gale", "pkma", "sdc2", "pgk1", "ndufv3", "arpp19b", "tpi1b", "pgam1a", "cyb5a", "pgam1b", "ppfia4", "ppp2cb", "gpc1b", "irs2b", "prps1b", "mdh2", "hdlbpa", "gnpda1", "pygb", "aldh9a1a.1", "fam162a", "agrn", "pfkpa", "aldh7a1", "cth", "rpe", "sod1", "cdk1", "glrx", "sdhc", "tpbgb", "nasp", "stmn1a", "pam…	Up-regulated
12	HALLMARK_MYC_TARGETS_V2	1.90458e-20	8.65718e-20	1.16907	0.610249	4.98032	58	c("npm1a", "pa2g4b", "nop16", "hspd1", "pes", "gnl3", "nop56", "aimp2", "cbx3a", "nop2", "phb", "wdr43", "bysl", "imp4", "mphosph10", "hspe1", "dusp2", "mcm4", "ddx18", "mcm5", "grwd1", "nip7", "mybbp1a", "srm", "rrp9", "exosc5", "nolc1", "hk2", "ndufaf4", "mycb", "ipo4", "slc19a1", "mrto4", "pprc1", "rrp12", "plk1", "prmt3", "cdk4", "tfb2m", "sord", "las1l", "ppan", "tmem97", "farsa", "utp20", "…	Up-regulated
13	HALLMARK_HEME_METABOLISM	7.12581e-18	2.7407e-17	1.08644	0.359824	4.72178	176	c("ctsba", "prdx2", "tyr", "blvrb", "ppp2r5b", "clcn3", "glrx5", "gmps", "slc6a8", "tmem9b", "dmtn", "hagh", "tspan5a", "sptan1", "bach1a", "lamp2", "psmd9", "riok3", "gclm", "slc30a1a", "bnip3la", "ucp2", "sdcbp2", "optn", "atp6v0a1a", "nnt", "nr3c1", "mpp1", "nek7", "mark3b", "selenbp1", "lrp10", "aldh6a1", "mospd1", "slc25a37", "asns", "smox", "nfe2l1b", "tfdp2", "hmbsa", "add1", "btg2", "cast…	Up-regulated
14	HALLMARK_FATTY_ACID_METABOLISM	8.16585e-18	2.91638e-17	1.08644	0.393736	4.70687	143	c("gapdhs", "suclg1", "pcbd1", "ldha", "idh1", "mif", "dldh", "eno3", "dlst", "sdhdb", "aco2", "ostc", "hadhb", "pdhb", "acadvl", "s100a10b", "odc1", "mdh2", "hsd17b10", "idh3b", "glulb", "sucla2", "idh3g", "g0s2", "aldh9a1a.1", "adsl", "echs1", "hccsb", "hsdl2", "eci1", "mao", "sdha", "suclg2", "bckdhb", "ptprga", "hadh", "psme1", "sdhc", "acadm", "idi1", "mgll", "mcee", "acsl4a", "hmgcl", "meta…	Up-regulated
15	HALLMARK_PI3K_AKT_MTOR_SIGNALING	4.52059e-15	1.41269e-14	0.996986	0.414538	4.42441	108	c("cfl1", "pfn1", "ywhaqb", "arhgdia", "ywhaqa", "ywhabb", "pin1", "ap2m1a", "ywhaba", "prkar2aa", "map2k6", "csnk2b", "ube2nb", "cltcb", "arpc3", "ppp2r1bb", "ube2na", "cltca", "sqstm1", "pikfyve", "tiam1b", "cab39l", "prkag1", "rac1a", "grb2b", "ptena", "map3k7", "cdk1", "actr2b", "smad2", "calr", "mapk1", "nck1b", "plcg1", "ptpn11a", "ube2d3", "ralba", "tsc2", "rptor", "ppp1cab", "arf1", "stat…	Up-regulated
16	HALLMARK_UV_RESPONSE_DN	2.01574e-15	6.71914e-15	1.00732	0.371491	4.39926	139	c("anxa2a", "mt2", "kita", "add3a", "atrx", "sdc2", "cav1", "sri", "schip1", "prkcea", "mapk14a", "mrps31", "bhlhe40", "ptena", "pdlim5b", "atp2c1", "bckdhb", "nr3c1", "nek7", "nrp1a", "apbb2b", "mgll", "dusp1", "spop", "atxn1a", "fynb", "pex14", "dlc1", "snai2", "atp2b1a", "cdk13", "celf2", "mycb", "bdnf", "anxa4", "abcc1", "atrn", "prdm2b", "nipblb", "ythdc1", "mgmt", "zmiz1a", "lamc1", "dyrk1a…	Up-regulated
17	HALLMARK_P53_PATHWAY	4.67013e-13	1.29726e-12	0.921426	0.301317	4.04534	182	c("ywhaqb", "tm4sf18", "icn", "ywhaqa", "iscub", "ndrg1a", "hint1", "gm2a", "fuca1.1", "pcna", "s100a10b", "appb", "blcap", "rap2b", "ip6k2b", "stom", "ak1", "fam162a", "epha2b", "ptprea", "abat", "ctsf", "ctsd", "wwp1", "triap1", "osgn1", "tax1bp3", "pom121", "sec61a1", "hexim1", "cd81a", "fosab", "baxa", "dnttip2", "dcxr", "slc19a2", "btg2", "rchy1", "hdac3", "fdxr", "tap1", "isg20", "ldhba", "…	Up-regulated
18	HALLMARK_HYPOXIA	4.6359e-13	1.29726e-12	0.921426	0.290075	4.04493	198	c("anxa2a", "mt2", "gapdhs", "aldocb", "cavin1b", "eno1a", "icn", "ldha", "tktb", "mif", "ugp2b", "ndrg1a", "eno3", "sdc2", "cav1", "pgk1", "atp7a", "tpi1b", "gpia", "ppfia4", "gpc1b", "klf6a", "irs2b", "hdlbpa", "ccng2", "fam162a", "bhlhe40", "hk1", "pfkpa", "csrp2", "bnip3la", "nr3c1", "glrx", "selenbp1", "fosl2", "myh9b", "dusp1", "xpnpep1", "tpbgb", "fosab", "cavin2b", "pam", "sdc4", "pfkla",…	Up-regulated
19	HALLMARK_TGF_BETA_SIGNALING	4.38309e-12	1.15345e-11	0.887075	0.526263	3.98978	49	c("sptbn1", "slc20a1b", "ctnnb1", "wwtr1", "hdac1", "apc", "fkbp1aa", "fkbp1ab", "cdh1", "id2a", "ncor2", "smurf2", "id3", "map3k7", "xiap", "skia", "fnta", "ube2d3", "junba", "furinb", "ppp1cab", "cdk9", "trim33", "ppm1aa", "bmpr2b", "tjp1b", "acvr1l", "id1", "tjp1a", "serpine1", "tgif1", "smad1", "smad7", "ppp1r15a", "hipk2", "smurf1", "cdkn1ca", "skila", "tgfb1a", "tgfbr1b", "smad3a")	Up-regulated
20	HALLMARK_ANDROGEN_RESPONSE	5.92363e-12	1.48091e-11	0.887075	0.386613	3.96489	98	c("myl12.1", "pa2g4b", "spcs3", "ndrg1a", "gnai3", "adrm1", "srp19", "sgk1", "itgav", "tmem50a", "ube2ia", "ccnd1", "zbtb10", "pdlim5b", "mhc1uba", "abhd2a", "gsr", "idi1", "pgm3", "vapal", "xrcc6", "arid5b", "stk39", "plpp1a", "cdc14b", "abcc4", "tpd52", "map7a", "rps6ka3b", "xrcc5", "hsd17b14", "acsl3b", "ngly1", "cdk6", "zmiz1a", "gpd1l", "rrp12", "appbp2", "ell2", "rab4a", "dbi", "slc38a2", "…	Up-regulated
21	HALLMARK_APOPTOSIS	1.62617e-10	3.87184e-10	0.826657	0.308805	3.67425	142	c("dap", "igfbp6b", "ppp2r5b", "etf1b", "slc20a1b", "cav1", "lmna", "hmgb2a", "ctnnb1", "ppt1", "ppp3r1b", "sqstm1", "appb", "sptan1", "ccnd1", "psen2", "cth", "bnip3la", "xiap", "sod1", "crebbpa", "bcap31", "gsr", "dnm1l", "dap3", "igf2r", "baxa", "top2a", "pea15", "gpx4b", "madd", "add1", "ebp", "btg3", "btg2", "gstm.2", "lgals3a", "fdxr", "plat", "gpx1a", "tap1", "isg20", "dnaja1", "bnip3lb", …	Up-regulated
22	HALLMARK_REACTIVE_OXYGEN_SPECIES_PATHWAY	2.65919e-10	5.78084e-10	0.814036	0.498657	3.64949	45	c("prdx2", "prdx1", "atox1", "txn", "ndufs2", "ndufb4", "lamtor5", "selenos", "pfkpa", "gclm", "sod1", "glrx", "gsr", "ndufa6", "prdx4", "gpx4b", "junba", "g6pd", "zgc:56095", "ptpa", "nqo1", "abcc1", "mbpb", "hmox2b", "pfkpb", "cat", "egln2", "scaf4a", "sbno2a", "ercc2", "glrx2", "oxsr1b", "srxn1", "gclc", "msra", "stk25b", "txnrd2.2", "gpx3")	Up-regulated
23	HALLMARK_INTERFERON_GAMMA_RESPONSE	2.20276e-10	5.00627e-10	0.826657	0.302823	3.62317	144	c("mt2", "mvp", "psmb8a", "sri", "nup93", "tnfaip6", "tor1", "vamp5", "psma3", "peli1b", "psme2", "pfkpa", "pde4ba", "psme1", "psmb2", "sc:d0202", "eif4e3", "trim25", "isoc1", "psmb9a", "stat3", "pnp5a", "pla2g4aa", "xaf1", "si:ch211-71m22.1", "hif1ab", "arid5b", "cd40", "stat2", "mxb", "znfx1", "mthfd2", "tap1", "isg20", "lysmd2", "adar", "ifih1", "wars", "st3gal5", "fas", "cmtr1", "irf9", "auts…	Up-regulated
24	HALLMARK_TNFA_SIGNALING_VIA_NFKB	2.45143e-09	5.10715e-09	0.774939	0.273628	3.59807	175	c("serpinb1l3", "sik1", "serpinb14", "sgk1", "nr4a3", "id2a", "tnfaip6", "sqstm1", "klf6a", "irs2b", "nfe2l2a", "tnip1", "rcan1a", "kdm6ba", "g0s2", "ptprea", "ccnd1", "bhlhe40", "zbtb10", "phlda1", "pdlim5b", "dusp2", "pde4ba", "fosl1a", "sc:d0202", "dennd5a", "fosl2", "dusp1", "fosab", "il6st", "dusp5", "sdc4", "junba", "atp2b1a", "abca1a", "btg3", "btg2", "ccnl1a", "mycb", "maff", "trib1", "ta…	Up-regulated
25	HALLMARK_IL2_STAT5_SIGNALING	5.71539e-09	1.09911e-08	0.761461	0.267867	3.52232	175	c("serpinb1l3", "ctsz", "ndrg1a", "eno3", "syngr2b", "ahcy", "snx9b", "pleca", "huwe1", "nop2", "itgav", "odc1", "klf6a", "tiam1b", "cyfip1", "spred2b", "ahr1b", "itgae.2", "bhlhe40", "phlda1", "rabgap1l", "syngr2a", "ptrh2", "nrp1a", "dennd5a", "igf2r", "mapkapk2a", "cd81a", "etv4", "gpx4b", "pnp5a", "gsto1", "furinb", "hk2", "gabarapb", "slc1a5", "si:ch211-71m22.1", "hopx", "snx14", "plpp1a", "…	Up-regulated
26	HALLMARK_PEROXISOME	5.56932e-09	1.09911e-08	0.761461	0.340241	3.48907	97	c("prdx1", "idh1", "cnbpa", "mvp", "abcd3a", "fis1", "idh2", "vps4b", "smarcc1a", "aldh9a1a.1", "crabp2b", "sod1", "crabp2a", "idi1", "isoc1", "atxn1a", "fdps", "pex14", "top2a", "acsl4a", "cln6a", "hmgcl", "eci2", "cln8", "ywhah", "acox1", "acot8", "lonp2", "cnbpb", "pabpc1b", "cdk7", "itgb1bp1", "ide", "hsd17b4", "msh2", "hrasb", "cat", "gstk1", "slc25a19", "ctps1b", "ercc1", "nr1i2", "gnpat", …	Up-regulated
27	HALLMARK_APICAL_JUNCTION	1.69543e-08	3.13968e-08	0.733762	0.248956	3.31872	179	c("pfn1", "msna", "actb1", "evla", "cap1", "arpc2", "cdk8", "rac2", "cdh1", "rsu1", "wasla", "zyx", "arhgef6", "myh10", "mapk14a", "ctnnd1", "ndnl2", "jam3b", "cd99", "rras", "ikbkg", "akt2", "actn4", "gtf2f1", "exoc4", "sgce", "ptena", "inppl1a", "skap2", "cd276", "lima1a", "cntn1a", "stx4", "hadh", "fscn1a", "pik3cb", "sc:d0202", "ctnna1", "myh9b", "dhx16", "plcg1", "nf1b", "myl9b", "ywhah", "s…	Up-regulated
28	HALLMARK_CHOLESTEROL_HOMEOSTASIS	1.14582e-07	2.04612e-07	0.704976	0.360307	3.22069	69	c("aldocb", "actb1", "cpeb2", "ctnnb1", "pcyt2", "anxa13", "chka", "anxa13l", "idi1", "fdps", "anxa5b", "si:ch211-71m22.1", "ebp", "lgmn", "gstm.2", "lgals3a", "acat2", "stx5a", "acss2", "trib3", "abca2", "pdk3a", "atxn2", "cyp51", "srebf2", "nsdhl", "gusb", "cd9a", "antxr2b", "hmgcs1", "gnai1", "tmem97", "ethe1", "dhcr7", "hmgcra", "sc5d", "tp53inp1", "ech1", "nfil3", "pmvk", "actb2", "stard4", …	Up-regulated
29	HALLMARK_UV_RESPONSE_UP	1.50328e-07	2.59187e-07	0.690132	0.248288	3.13709	161	c("tuba8l3", "tuba8l4", "ap2s1", "psmc3", "cdc5l", "atp6v1f", "atp6v1c1a", "rab27a", "eif2s3", "ppifb", "amd1", "arrb2b", "rpn1", "cnp", "slc6a8", "ppt1", "hnrnpub", "sqstm1", "tegt", "eif5", "stip1", "spra", "nup58", "prpf3", "cltb", "pole3", "fen1", "chka", "grpel1", "mao", "sc:d0202", "prkacab", "mrpl23", "rfc4", "polr2h", "fosab", "il6st", "asns", "selenow1", "hnrnpua", "junba", "furinb", "si…	Up-regulated
30	HALLMARK_ESTROGEN_RESPONSE_LATE	4.34042e-07	7.23404e-07	0.674963	0.23657	3.0671	171	c("blvrb", "ywhaqb", "add3a", "ywhaqa", "slc7a5", "gale", "cav1", "etfb", "ppifb", "cdh1", "sgk1", "ckbb", "id2a", "idh2", "ncor2", "tiam1b", "slc16a1b", "ccnd1", "tfap2c", "dusp2", "rarres3", "rarres3l", "jak1", "abhd2a", "dnajc1", "tpbgb", "maptb", "fosab", "il6st", "cox6c", "top2a", "dcxr", "rnaseh2a", "btg3", "amfra", "rabep1", "isg20", "nxt2", "itpk1b", "fkbp4", "pkp3b", "ckba", "hprt1", "tp…	Up-regulated
31	HALLMARK_XENOBIOTIC_METABOLISM	5.78776e-07	9.3351e-07	0.659444	0.226293	3.06597	186	c("mt2", "tyr", "blvrb", "cndp2", "idh1", "pgrmc1", "acp1", "ahcy", "arpp19b", "pgd", "aco2", "cyb5a", "id2a", "sar1b", "nmt1a", "ptges3a", "fbln1", "ddt", "adh5", "tegt", "aldh9a1a.1", "nfs1", "epha2b", "pdlim5b", "mao", "atp2a2b", "gsr", "gsta.1", "mccc2", "dcxr", "pora", "pts", "smox", "ddah2", "gsto1", "gabarapb", "slc1a5", "gstm.2", "man1a1", "tkfc", "acox1", "nqo1", "slc35b1", "fas", "hprt1…	Up-regulated
32	HALLMARK_COMPLEMENT	6.82038e-07	1.06568e-06	0.659444	0.235136	3.02752	168	c("pfn1", "ctsba", "mt2", "atox1", "zeb1b", "ctsc", "gnai3", "pla2g7", "calm2a", "ctsh", "rhogb", "calm1a", "ppp2cb", "adra2b", "gmfb", "dusp6", "dgkh", "lamp2", "rabif", "calm3a", "mmp15b", "grb2b", "ctsd", "ppp4cb", "usp14", "stx4", "xpnpep1", "psmb9a", "fynb", "csrp1a", "anxa5b", "sh2b3", "dusp5", "pik3ca", "fdx1", "pla2g4aa", "akap10", "si:ch211-71m22.1", "rnf4", "lgmn", "ctsla", "lgals3a", "…	Up-regulated
33	HALLMARK_INTERFERON_ALPHA_RESPONSE	2.15339e-06	3.26271e-06	0.627257	0.332897	2.8735	64	c("psmb8a", "cnp", "elf1", "psma3", "psme2", "psme1", "mov10b.1", "trim25", "nub1", "psmb9a", "si:ch211-71m22.1", "uba7", "mvb12a", "stat2", "mxb", "tap1", "isg20", "adar", "ifih1", "wars", "cmtr1", "irf9", "ifi35", "lap3", "casp8", "epsti1", "txnipa", "lpar6a", "mxa", "slc25a28", "irf2", "ifit11", "usp18", "eif2ak2", "parp12a", "ogfr", "trafd1", "gbp2", "il15", "mxe", "gmpr", "sp100.3")	Up-regulated
34	HALLMARK_SPERMATOGENESIS	0.000173571	0.000255251	0.518848	0.225098	2.50158	116	c("gapdhs", "ldha", "tktb", "naa10", "pgk1", "prkar2aa", "cct6a", "vdac3", "stam2", "psmg1", "jam3b", "slc12a2", "clgn", "cdk1", "mtor", "papola", "mllt10", "rfc4", "ttk", "gstm.2", "coil", "ezh2", "map7a", "pgs1", "mast2", "tsn", "ide", "chfr", "dnajb6a", "alox12", "bub1", "zc3h14", "phkg2", "kif2c", "csnk2a2b", "agfg1a", "parp2", "aurka", "pias2", "strbp", "ncaph", "dbf4", "taldo1", "dnajb6b", …	Up-regulated
35	HALLMARK_NOTCH_SIGNALING	0.000286733	0.000409619	0.498493	0.402916	2.36678	28	c("skp1", "rbx1", "aph1b", "lfng", "psenen", "ccnd1", "psen2", "cul1b", "notch2", "dtx4b", "prkcaa", "tcf7l2", "fbxw11b", "fzd1", "her6", "fzd7b", "kat2a", "ppardb", "dtx2")	Up-regulated
36	HALLMARK_ESTROGEN_RESPONSE_EARLY	0.000601095	0.000834854	0.477271	0.173877	2.3134	180	c("zgc:91968", "blvrb", "ywhaqb", "add3a", "ywhaqa", "syngr1a", "slc7a5", "ppifb", "ttc39a", "reep1", "elf1", "ncor2", "tiam1b", "ugcg", "mlpha", "slc16a1b", "slc37a1", "ccnd1", "bhlhe40", "abat", "tfap2c", "rarres3", "rarres3l", "abhd2a", "mybbp1a", "tpbgb", "maptb", "fosab", "elovl2", "il6st", "cant1a", "dlc1", "gab2", "slc7a2", "kdm4b", "slc19a2", "amfra", "mycb", "akap1b", "nxt2", "itpk1b", "…	Up-regulated
37	HALLMARK_BILE_ACID_METABOLISM	0.000979648	0.00128901	0.45506	0.218091	2.28216	102	c("idh1", "abcd3a", "idh2", "aldh9a1a.1", "gclm", "optn", "sod1", "idi1", "isoc1", "atxn1a", "nedd4a", "abca1a", "slco1c1", "fdxr", "lonp2", "pex7", "lipeb", "abca5", "abca2", "hsd17b4", "pex19", "npc1", "cat", "nudt12", "abca3b", "gstk1", "nr1i2", "pxmp2", "gnpat", "cyp46a1.2", "gnmt", "pecr", "pex16", "pex26", "zgc:158482", "slc35b2", "phyh", "rxraa", "slc23a2", "pex13", "mlycd", "hacl1", "hsd3…	Up-regulated
38	HALLMARK_KRAS_SIGNALING_UP	0.00092704	0.00125276	0.477271	0.176414	2.27144	168	c("prelid3b", "psmb8a", "mycn", "ammecr1", "fuca1.1", "id2a", "dusp6", "cab39l", "akt2", "g0s2", "hdac9b", "rbm4.2", "rabgap1l", "etv5a", "glrx", "nrp1a", "ccser2a", "adam17a", "rbm4.1", "etv4", "plat", "trib1", "ctss2.1", "avl9", "map7a", "usp12a", "ets1", "cbx8a", "strn", "si:dkeyp-82a1.6", "dcbld2", "cbr4", "map3k1", "znf277", "jupb", "evi5b", "cbl", "yrdc", "cbx8b", "scn1ba", "hbegfb", "tnfrs…	Up-regulated
39	HALLMARK_WNT_BETA_CATENIN_SIGNALING	0.00296177	0.00370221	0.431708	0.298673	2.09949	41	c("ctnnb1", "hdac1", "csnk1e", "ncor2", "psen2", "adam17a", "cul1b", "dvl2", "rbpjb", "CABZ01110881.1", "hdac5", "mycb", "wnt5b", "axin1", "jag2b", "maml1", "gnai1", "fzd1", "kat2a", "ppardb", "skp2", "numb", "axin2", "gbp", "ptch1", "myca", "lef1")	Up-regulated
40	HALLMARK_IL6_JAK_STAT3_SIGNALING	0.00555104	0.00676956	0.407018	0.223215	1.92674	64	c("itga4", "stam2", "crfb4", "grb2b", "il10rb", "cntfr", "ptpn11a", "stat3", "il6st", "stat2", "fas", "irf9", "pim1", "tnfrsf21", "stat1a", "tyk2", "cd9a", "ptpn1", "tnfrsf1a", "ptpn2b", "ifngr1l", "il13ra1", "cbl", "lepr", "socs3a", "socs1a", "tnfrsf1b", "socs3b", "hmox1a", "lifrb", "tgfb1a", "acvrl1")	Up-regulated
41	HALLMARK_EPITHELIAL_MESENCHYMAL_TRANSITION	0.0315534	0.03669	0.282013	0.127471	1.69738	178	c("fstl1b", "slc6a8", "fuca1.1", "itga5", "gpc1b", "itgav", "id2a", "mcm7", "ndnl2", "emp3b", "fbln1", "fermt2", "copa", "pcolce2b", "snai2", "sdc4", "wipf1b", "pdlim4", "myl9b", "qsox1", "bdnf", "flna", "sgcd", "lrrc15", "fas", "cdh2", "plod3", "sgcb", "lamc1", "itgb1a", "notch2", "htra1a", "col4a1", "serpinh1a", "dab2", "mmp14b", "gadd45bb", "loxl1", "capgb", "gadd45ab", "zgc:64002", "serpine2"…	Up-regulated
42	HALLMARK_MYOGENESIS	0.0325301	0.036966	0.276501	0.124565	1.68849	187	c("atp6ap1b", "gnao1a", "cox6a1", "myl6", "eno3", "syngr2b", "wwtr1", "schip1", "ifrd1", "slc6a8", "ppfia4", "reep1", "ckbb", "cox7a1", "appb", "mef2aa", "sptan1", "ak1", "akt2", "agrn", "tpm3", "bhlhe40", "psen2", "syngr2a", "myh9b", "fkbp1b", "fdps", "atp2a1", "tsc2", "sirt2", "hdac5", "si:ch211-242b18.1", "nqo1", "sh2b1", "sgcd", "foxo4", "svila", "camk2b1", "mef2d", "myo1cb", "ckba", "kifc3",…	Up-regulated
43	HALLMARK_HEDGEHOG_SIGNALING	0.0193935	0.0230875	0.352488	0.257347	1.6549	35	c("rtn1b", "dpysl2b", "nrp1a", "myh9b", "cntfr", "l1cama", "nf1b", "rasa1a", "cdk6", "ldb1a", "tle3b", "ophn1", "nrcama", "adgrg1", "thy1", "l1camb", "amot", "plg", "vegfaa", "ets2", "ptch1", "nrp2a", "nkx6.1", "slit1a", "ache", "gli1", "vldlr", "hey2", "celsr1a", "hey1")	Up-regulated
44	HALLMARK_APICAL_SURFACE	0.241481	0.256895	0.103576	0.18381	1.18201	35	c("adam10a", "appb", "crybg1a", "gstm.2", "flot2a", "adipor2", "dcbld2", "ncoa6", "b4galt1l", "flot2b", "ephb4b", "efna5b", "thy1", "sulf2b", "atp8b1", "rtn4rl1a", "crybg1b", "afap1l2", "gas1a", "ntng1a", "atp6v0a1b", "gstm.3", "si:ch73-173p19.2", "mdga1", "pcsk9", "malb")	Up-regulated
45	HALLMARK_COAGULATION	0.236504	0.256895	0.0962406	0.106303	1.18138	116	c("dct", "ctsba", "wdr1", "iscub", "ctsh", "dusp6", "lamp2", "rac1a", "rabif", "pef1", "mmp15b", "ctsk", "rapgef3", "fynb", "csrp1a", "furinb", "sirt2", "lgmn", "capn5a", "ctsla", "maff", "gnb2", "plat", "lta4h", "htra1a", "gsna", "adam9", "cd9a", "mmp14b", "hmgcs1", "serpine1", "casp9", "prep", "bmp1a", "gng12a", "arf4a")	Up-regulated
46	HALLMARK_INFLAMMATORY_RESPONSE	0.554863	0.554863	0.0510114	0.072508	0.903113	157	c("gnai3", "sri", "rhogb", "adrm1", "itga5", "slc31a1", "tnfaip6", "klf6a", "emp3b", "ahr1b", "kif1b", "ptprea", "selenos", "il10rb", "atp2c1", "pde4ba", "atp2a2b", "sc:d0202", "tpbgb", "atp2b1a", "abca1a", "slc7a2", "hif1ab", "btg2", "cd40", "mycb", "abi1a")	Up-regulated
47	HALLMARK_ANGIOGENESIS	0.391176	0.39916	0.116739	-0.156643	-1.05349	30	c("ccnd2a", "lpl", "pglyrp5", "postna", "cxcl8a", "fgfr1b")	Down-regulated
48	HALLMARK_PANCREAS_BETA_CELLS	0.360856	0.375892	0.125033	-0.148377	-1.07433	35	c("vdrb", "mafba", "lmo2", "nkx2.2a", "pax4", "foxa2", "pcsk2", "sst1.1", "insm1a", "pklr", "neurog3", "pax6b", "gck", "dpp4", "ins", "gcga", "chga", "scgn", "abcc8", "pdx1", "foxo1b", "nkx6.1", "pcsk1", "slc2a2")	Down-regulated
49	HALLMARK_KRAS_SIGNALING_DN	0.112008	0.124453	0.287805	-0.0907009	-1.39883	157	c("camk1da", "ckmb", "rsad2", "ifng1", "pcdh1g18", "ptprja", "cd40lg", "tent5c", "npy8ar", "ccdc106b", "cpb1", "ugt2a4", "slc5a5", "selenop", "nr4a2a", "chrng", "mxc", "edn2", "pcdh1g1", "pax4", "krt95", "htr1d", "fshb", "zgc:153932", "tshba", "tas2r200.2", "krt93", "adra2c", "shox2", "myh7", "ngb", "c5", "htr1b", "oxt", "gprc5c", "il12ba", "krt94", "sncb", "insl5a", "cacng1b", "egf", "igfbp2a", …	Down-regulated
50	HALLMARK_ALLOGRAFT_REJECTION	0.0013462	0.0017259	0.45506	-0.1395	-2.14622	154	c("b2m", "rps19", "cd74a", "rpl39", "ccl35.1", "rps9", "ccl19a.1", "ccl35.2", "spi1b", "ccnd2a", "zap70", "cd247", "lcp2a", "cxcr3.1", "il2rga", "zmp:0000001082", "cd8a", "irf8", "cxcl11.6", "ncf4", "itk", "tlr1", "mhc1zja", "ifng1", "cxcl8a", "srgn", "tnfa", "il10", "cd40lg", "gzm3.3", "gpr65", "hbl4")	Down-regulated
