# Supplementary material
Source: Research Square preprint supplement (doi:10.21203/rs.3.rs-8735458/v1)
Supplement: Supplementary file 2 [file 2cbfa9e8275ec1b0c84e0fe6.xlsx]

## Sheet: SupplementaryTable3_number_of_c
Number of cells per cell type per sample
	GNA11	GNA11;bap1+/-	GNA11;p53del	UM_mixed_samples
B cell	1532	983	201	1261
cancer cell	9230	10272	4116	6479
epithelial cell	76	21	201	49
erythrocyte	721	595	305	619
fibroblast	3541	1601	483	848
inflammatory macrophage	175	89	2	6
iridophore	432	1153	149	793
macrophage	1858	6247	959	1462
natural killer cell	99	546	1019	345
neutrophil	146	34	63	122
smooth muscle cell	0	0	18	69
T-helper 2 cell	15	26	60	82
T cell	1863	7344	1222	1372
