# Supplementary material
Source: Research Square preprint supplement (doi:10.21203/rs.3.rs-8735458/v1)
Supplement: Supplementary file 3 [file 2e0edf7f4ca0b8e0f8daa26b.xlsx]

## Sheet: Sheet1
DE analysis of the YAP target genes between contitutively active YAP model vs wt
p_val	avg_log2FC	pct.1	pct.2	p_val_adj	cluster	gene
0	0.695562	0.352	0.119	0	gna11;bap1+/- , GNA11;p53del , UM mixed samples	mob1a
1.48941e-283	0.530709	0.374	0.146	5.12118e-279	gna11;bap1+/- , GNA11;p53del , UM mixed samples	rpn1
1.78446e-231	0.774451	0.19	0.042	6.13568e-227	gna11;bap1+/- , GNA11;p53del , UM mixed samples	stk3
2.66633e-229	1.58991	0.163	0.026	9.16792e-225	gna11;bap1+/- , GNA11;p53del , UM mixed samples	yap1
2.65661e-207	2.51527	0.12	0.011	9.1345e-203	gna11;bap1+/- , GNA11;p53del , UM mixed samples	birc5a
3.94447e-172	1.0794	0.142	0.031	1.35627e-167	gna11;bap1+/- , GNA11;p53del , UM mixed samples	mob1bb
3.02228e-138	2.10711	0.058	0.008	1.03918e-133	gna11;bap1+/- , GNA11;p53del , UM mixed samples	itgb2
6.15526e-108	1.3527	0.462	0.416	2.11642e-103	GNA11;YAPS5A	amotl2a
2.41818e-15	0.683622	0.198	0.264	8.31468e-11	GNA11;YAPS5A	ywhah
4.68737e-14	0.709878	0.279	0.368	1.6117e-09	GNA11;YAPS5A	tead3b
6.6816e-10	0.775051	0.156	0.196	2.2974e-05	GNA11;YAPS5A	tead1a
