# Supplementary material
Source: Research Square preprint supplement (doi:10.21203/rs.3.rs-8735458/v1)
Supplement: Supplementary file 4 [file 6ebacffe34838c67425472c0.xlsx]

## Sheet: Sheet1
DE analysis of the YAP target genes between cancer cells of GNA11, GNA11;p53del , GNA11;bap1+/-
p_val	avg_log2FC	pct.1	pct.2	p_val_adj	cluster	gene
1.89403e-59	2.23653	0.16	0.096	6.51242e-55	GNA11	ywhag1
0	2.79045	0.452	0.118	0	GNA11;bap1+/-	ctgfa
0	2.34978	0.452	0.156	0	GNA11;bap1+/-	amotl2b
0	2.00787	0.46	0.19	0	GNA11;bap1+/-	amotl2a
1.14884e-239	1.04145	0.449	0.302	3.95016e-235	GNA11;bap1+/-	iqgap1
4.87735e-215	1.4936	0.269	0.128	1.67703e-210	GNA11;bap1+/-	tjp2b
1.05216e-100	2.16484	0.15	0.074	3.61775e-96	GNA11;bap1+/-	tead1b
1.87157e-69	0.744585	0.307	0.239	6.43519e-65	GNA11;bap1+/-	tead3b
5.92744e-68	1.57195	0.054	0.032	2.03809e-63	GNA11;bap1+/-	itgb2
9.62043e-63	1.22462	0.166	0.104	3.30789e-58	GNA11;bap1+/-	tead1a
3.78372e-25	0.645504	0.206	0.175	1.30099e-20	GNA11;bap1+/-	ywhah
4.07023e-18	0.720174	0.101	0.075	1.39951e-13	GNA11;bap1+/-	tgfb1a
2.36735e-08	0.664444	0.179	0.168	0.000813988	GNA11;bap1+/-	ccnd1
0	0.764292	0.619	0.189	0	GNA11;p53del	rpn1
0	1.34813	0.464	0.111	0	GNA11;p53del	ccnd1
0	1.44472	0.368	0.055	0	GNA11;p53del	stk3
0	0.500116	0.318	0.079	0	GNA11;p53del	ywhag1
0	1.40228	0.234	0.028	0	GNA11;p53del	mob1bb
