# Supplementary material
Source: Research Square preprint supplement (doi:10.21203/rs.3.rs-8735458/v1)
Supplement: Supplementary file 5 [file 7da020f26c438a689a5023d7.xlsx]

## Sheet: SupplementaryTable1_28clusters_
Unsupervised clustering with a resolution of 0.55. Number of cells per cluster per sample
	GNA11	GNA11;bap1+/-	GNA11;p53del	UM_mixed_samples
C01	1080	5014	755	1074
C02	1368	4049	1665	460
C03	1247	4648	868	721
C04	4526	1442	288	586
C05	3362	1387	450	795
C06	845	2333	631	971
C07	1144	974	982	776
C08	673	1267	205	1706
C09	392	2020	185	542
C10	1296	614	116	806
C11	432	1153	149	793
C12	721	595	305	619
C13	99	546	1019	345
C14	44	15	2	1543
C15	630	192	343	437
C16	224	676	169	109
C17	236	369	85	455
C18	679	132	73	192
C19	69	330	70	84
C20	22	405	40	71
C21	8	366	21	41
C22	146	34	63	122
C23	76	21	201	49
C24	175	89	2	6
C25	82	110	23	32
C26	97	104	10	21
C27	15	26	60	82
C28	0	0	18	69
