# Supplementary material
Source: Research Square preprint supplement (doi:10.21203/rs.3.rs-8735458/v1)
Supplement: Supplementary file 6 [file e2590e5be5d4899535d6abcb.xlsx]

## Sheet: Sheet1
Sample	Assignment	n_sample	total_sample	n_others	total_others	prop_sample	prop_others	p_value	FDR
GNA11	T cell	1863	19688	8566	37709	0.0946262	0.227161	0	0
GNA11;bap1+/-	T cell	7344	28911	3085	28486	0.254021	0.108299	0	0
GNA11;p53del	T cell	1222	8798	9207	48599	0.138895	0.189448	1.30421e-29	2.21149e-29
GNA11	macrophage	1858	19688	7206	37709	0.0943722	0.191095	9.58196e-200	5.33852e-199
GNA11;bap1+/-	macrophage	6247	28911	2817	28486	0.216077	0.0988907	0	0
GNA11;p53del	macrophage	959	8798	8105	48599	0.109002	0.166773	1.81994e-42	4.17516e-42
GNA11	fibroblast	3541	19688	2084	37709	0.179856	0.0552653	0	0
GNA11;bap1+/-	fibroblast	1601	28911	4024	28486	0.0553768	0.141262	3.81253e-262	2.47814e-261
GNA11;p53del	fibroblast	483	8798	5142	48599	0.0548988	0.105805	2.72122e-49	7.07517e-49
GNA11	natural killer cell	99	19688	1565	37709	0.00502844	0.041502	1.13776e-134	4.03389e-134
GNA11;bap1+/-	natural killer cell	546	28911	1118	28486	0.0188855	0.0392473	1.01507e-47	2.47423e-47
GNA11;p53del	natural killer cell	1019	8798	645	48599	0.115822	0.0132719	0	0
