# Supplementary material
Source: Research Square preprint supplement (doi:10.21203/rs.3.rs-8735458/v1)
Supplement: Supplementary file 7 [file f6b942bd93947f0eb2f381fe.xlsx]

## Sheet: DE tumor vs wt immature
	avg_log2FC	pct.1	pct.2	p_val_adj	genes
1.61064e-262	0.965311	1	1	5.53803e-258	pfn1
9.84504e-214	4.22607	0.726	0.091	3.38512e-209	mhc1uba
2.1466e-162	0.828585	1	1	7.38087e-158	actb2
1.34317e-120	1.23917	0.928	0.819	4.61834e-116	cpa5
6.36082e-117	1.53035	0.83	0.546	2.18711e-112	HACD4
1.20948e-104	1.91843	0.74	0.404	4.15866e-100	gapdh
2.19225e-99	0.944887	0.932	0.781	7.53783e-95	si:ch1073-429i10.1
4.4064e-92	1.27481	0.852	0.622	1.5151e-87	wasb
1.68257e-82	2.1616	0.574	0.216	5.78534e-78	mrtfab
1.65068e-80	4.0008	0.484	0.128	5.67571e-76	CR318588.1
5.14402e-75	1.22108	0.802	0.587	1.76872e-70	lxn
1.39088e-74	2.66278	0.46	0.119	4.78239e-70	si:ch211-286b5.8
1.81612e-73	1.70302	0.604	0.271	6.24454e-69	nlgn1
2.62828e-71	0.402923	1	1	9.03707e-67	rps21
1.68192e-68	0.482703	0.997	0.991	5.78313e-64	rps13
7.22442e-68	1.87391	0.557	0.257	2.48405e-63	pde7a
7.2856e-59	0.35359	0.998	1	2.50508e-54	rplp2
1.89233e-52	1.67145	0.498	0.213	6.50659e-48	BX296551.1
9.69857e-51	1.44858	0.611	0.342	3.33476e-46	h1fx
2.52473e-50	0.404067	0.995	0.994	8.68102e-46	rps25
8.86355e-49	0.3037	0.998	1	3.04764e-44	npsn
8.88052e-49	3.60426	0.276	0.038	3.05348e-44	kita
1.1951e-46	0.689424	0.877	0.839	4.10925e-42	rsl24d1
6.46907e-45	2.7306	0.311	0.073	2.22433e-40	wu:fb05h10
1.4717e-44	1.66316	0.462	0.204	5.0603e-40	si:dkey-24p1.7
1.16526e-43	0.432717	0.982	0.972	4.00663e-39	ppiaa
1.29947e-40	0.426096	0.985	0.979	4.4681e-36	rpl34
5.87274e-40	1.63155	0.418	0.172	2.01928e-35	sybl1
2.06408e-39	1.76095	0.368	0.129	7.09714e-35	itgae.2
7.16601e-39	2.70566	0.268	0.059	2.46396e-34	si:dkey-159f12.2
1.53329e-38	1.56223	0.445	0.211	5.27206e-34	spice1
1.85902e-36	0.355156	0.997	0.993	6.39205e-32	rps19
4.76008e-36	2.89145	0.234	0.042	1.6367e-31	gig2d
1.38949e-35	0.63964	0.838	0.762	4.77763e-31	serbp1a
1.97454e-35	0.528677	0.92	0.895	6.78925e-31	rps3
3.94209e-35	0.476715	0.96	0.954	1.35545e-30	rps26
1.02754e-34	0.937699	0.688	0.515	3.53308e-30	si:dkey-112e7.2
1.34648e-34	3.8097	0.225	0.041	4.62975e-30	BX908782.3
1.38475e-34	0.352215	0.997	0.996	4.76132e-30	rps15a
2.44306e-33	2.14864	0.291	0.091	8.40021e-29	si:dkey-222f2.7
2.73739e-33	0.328147	0.997	0.996	9.41223e-29	rpl24
2.81372e-33	2.37171	0.248	0.055	9.67471e-29	hhla2a.1
3.66987e-33	1.22699	0.512	0.294	1.26185e-28	zgc:153317
2.22794e-32	1.63929	0.349	0.151	7.66056e-28	ccnd2a
6.46604e-32	1.98025	0.336	0.142	2.22328e-27	plbd1
7.25281e-32	1.98387	0.293	0.1	2.49381e-27	tnrc6c1
1.77144e-31	0.294841	0.997	0.995	6.0909e-27	rpl22
2.5981e-31	1.18989	0.549	0.357	8.9333e-27	si:dkey-53k12.2
2.74718e-31	0.692651	0.772	0.669	9.44591e-27	tubb4b
8.04168e-28	1.18739	0.5	0.312	2.76505e-23	cnksr2b
1.48001e-27	1.46651	0.404	0.222	5.08886e-23	cbx7a
4.26239e-27	0.308387	0.997	0.999	1.46558e-22	rpl31
1.43611e-26	2.00943	0.29	0.121	4.93791e-22	wu:fj29h11
1.59392e-26	4.29345	0.143	0.01	5.48054e-22	gstm.2
2.26045e-26	2.78401	0.2	0.048	7.77231e-22	histh1l
2.68846e-26	0.732785	0.678	0.567	9.244e-22	eef1db
3.95524e-26	0.313246	0.995	1	1.35997e-21	rpl36a
6.38735e-26	2.17237	0.24	0.08	2.19623e-21	MCMDC2
2.67625e-25	1.47866	0.345	0.169	9.20203e-21	LOC103909972
3.60748e-25	2.65213	0.17	0.032	1.2404e-20	ifi46
4.84526e-25	0.710467	0.765	0.667	1.666e-20	cfl1l
8.22553e-25	3.36046	0.154	0.023	2.82826e-20	fthl31
1.07507e-24	0.873167	0.604	0.438	3.69652e-20	il16
2.19442e-24	0.584072	0.911	0.872	7.54528e-20	cirbpb
6.42551e-24	2.22116	0.224	0.079	2.20935e-19	krt8
9.0272e-24	1.72952	0.297	0.139	3.10391e-19	c6ast1
1.0254e-23	5.62839	0.12	0.004	3.52575e-19	gabrr3a
1.18428e-23	0.375282	0.975	0.968	4.07203e-19	rps3a
2.10318e-23	0.437608	0.896	0.851	7.23156e-19	cox6b2
3.92258e-23	0.279644	0.996	0.998	1.34874e-18	uba52
4.49528e-23	0.549474	0.819	0.739	1.54566e-18	serf2
6.81531e-23	0.234377	0.995	0.998	2.34338e-18	rps27a
8.79006e-23	0.603166	0.743	0.683	3.02238e-18	eef1da
9.04586e-23	0.486193	0.869	0.826	3.11033e-18	prdx5
1.00598e-22	0.316677	0.994	0.995	3.45896e-18	rps26l
4.04552e-22	0.341996	0.986	0.977	1.39101e-17	rpl18a
4.23861e-22	0.807848	0.679	0.537	1.4574e-17	ppdpfa
4.78273e-22	0.616607	0.744	0.649	1.64449e-17	nsa2
7.47992e-22	4.25332	0.126	0.012	2.5719e-17	LOC100537384
8.54266e-22	2.65668	0.134	0.018	2.93731e-17	zgc:152791
9.73072e-22	2.26008	0.204	0.067	3.34581e-17	notch1b
1.46584e-21	1.25947	0.383	0.214	5.04016e-17	itpkcb
2.73597e-21	0.289261	0.994	0.99	9.40735e-17	rpl30
1.24826e-20	1.36876	0.194	0.054	4.29201e-16	si:ch73-22o12.1
1.25388e-20	1.49424	0.332	0.186	4.31135e-16	usp36
1.83229e-20	1.31744	0.298	0.139	6.30014e-16	FP074902.2
2.32298e-20	0.638898	0.794	0.73	7.98733e-16	si:ch211-132p1.3
2.47808e-20	1.96204	0.208	0.074	8.52064e-16	wu:fc75a09
4.2706e-20	1.05574	0.44	0.289	1.4684e-15	ppifb
6.95089e-20	0.351313	0.972	0.973	2.38999e-15	rpl7a
7.29079e-20	0.300019	0.993	0.999	2.50687e-15	rpl13
7.66288e-20	1.36166	0.276	0.124	2.6348e-15	si:dkey-27i16.2
7.82113e-20	4.5066	0.102	0.004	2.68922e-15	FO904898.3
9.17833e-20	1.16474	0.408	0.249	3.15588e-15	dusp1
1.11215e-19	0.841834	0.546	0.416	3.82401e-15	tpm1
1.79385e-19	0.654702	0.645	0.515	6.16796e-15	hbegfa
2.03282e-19	2.00723	0.19	0.062	6.98963e-15	ehbp1l1a
2.76991e-19	2.49285	0.15	0.034	9.52408e-15	haao
3.10601e-19	1.23401	0.382	0.234	1.06797e-14	ctss1
3.16646e-19	0.789175	0.614	0.483	1.08876e-14	rpl22l1
4.282e-19	1.73959	0.217	0.081	1.47232e-14	tmem176l.3a
4.37464e-19	2.482	0.149	0.034	1.50418e-14	s100z
4.83962e-19	1.44477	0.275	0.129	1.66405e-14	nupr1a
4.84111e-19	0.325582	0.956	0.951	1.66457e-14	naca
6.5372e-19	1.63536	0.21	0.075	2.24775e-14	gig2h
8.56634e-19	1.91486	0.182	0.057	2.94545e-14	CABZ01074307.1
1.59001e-18	3.91497	0.115	0.014	5.46708e-14	selenou1b
1.8526e-18	1.0375	0.435	0.294	6.36997e-14	LOC103909422
1.94032e-18	0.67814	0.592	0.457	6.67159e-14	dgkzb
2.1682e-18	0.425351	0.848	0.809	7.45514e-14	rpl5a
2.52394e-18	1.27501	0.287	0.143	8.67832e-14	atp2a3
2.84915e-18	0.645158	0.643	0.522	9.79651e-14	dub
2.96837e-18	0.381121	0.939	0.93	1.02065e-13	eef1g
4.33016e-18	1.42027	0.326	0.186	1.48888e-13	rsl1d1
5.77345e-18	3.40983	0.109	0.014	1.98514e-13	hacd3
9.2346e-18	2.04115	0.156	0.042	3.17522e-13	mkrn1
1.02322e-17	3.54558	0.106	0.012	3.51825e-13	sat1b
1.29178e-17	1.96101	0.171	0.053	4.44167e-13	itgb3a
2.4761e-17	1.78873	0.206	0.081	8.51383e-13	BX004996.1
2.63291e-17	0.305151	0.983	0.989	9.05299e-13	rplp0
5.39959e-17	2.23741	0.152	0.043	1.85659e-12	rnf44
5.43483e-17	0.394152	0.916	0.899	1.86871e-12	arpc1b
6.59713e-17	3.78013	0.095	0.009	2.26836e-12	zgc:171497
7.23104e-17	1.00384	0.417	0.282	2.48632e-12	psmb8a
7.27781e-17	0.829559	0.504	0.385	2.5024e-12	eif3k
7.74772e-17	0.286415	0.972	0.964	2.66397e-12	zgc:114188
7.85578e-17	1.57011	0.199	0.078	2.70113e-12	si:dkey-83k24.5
8.8758e-17	1.92427	0.146	0.037	3.05185e-12	LOC101884510
1.11634e-16	0.222138	0.998	0.999	3.83843e-12	rpl39
1.1701e-16	0.31853	0.942	0.941	4.02327e-12	btf3
1.18067e-16	0.719158	0.479	0.32	4.05963e-12	CR848841.1
1.21704e-16	0.722077	0.62	0.507	4.18469e-12	gpx1a
1.25246e-16	6.13164	0.08	0.001	4.30645e-12	ly6m5
1.42308e-16	0.757697	0.601	0.499	4.89312e-12	pim1
1.87193e-16	1.27841	0.299	0.164	6.43644e-12	gadd45ba
1.88181e-16	3.68121	0.084	0.004	6.47041e-12	pkig
3.20575e-16	2.99329	0.112	0.018	1.10226e-11	sesn1
4.00714e-16	0.295181	0.988	0.985	1.37782e-11	faua
5.00874e-16	1.54025	0.212	0.092	1.7222e-11	si:dkey-34d22.5
1.47821e-15	0.341591	0.994	0.995	5.08266e-11	rps20
1.6788e-15	0.332118	0.942	0.922	5.77238e-11	rpl23a
1.75999e-15	0.821858	0.461	0.329	6.05154e-11	cited4a
1.78525e-15	1.82502	0.181	0.069	6.1384e-11	gpr183a
2.03697e-15	5.66834	0.077	0.001	7.00391e-11	LOC100332582
2.31918e-15	1.31146	0.259	0.133	7.97425e-11	suco
2.39848e-15	1.05325	0.357	0.227	8.24693e-11	CABZ01111959.1
2.49459e-15	0.374074	0.99	0.99	8.5774e-11	rplp2l
2.50612e-15	2.04002	0.161	0.055	8.61704e-11	cbr1l
2.59078e-15	0.935652	0.427	0.299	8.90813e-11	cited4b
4.96223e-15	3.17116	0.106	0.02	1.70621e-10	si:ch211-14c7.2
5.30586e-15	0.366868	0.836	0.797	1.82437e-10	romo1
5.49284e-15	3.54392	0.087	0.009	1.88866e-10	zgc:153759
5.69573e-15	4.60756	0.078	0.004	1.95842e-10	CT573337.1
5.74072e-15	1.43661	0.312	0.191	1.97389e-10	dusp19b
5.74734e-15	0.247432	0.987	0.995	1.97617e-10	rps28
8.82916e-15	0.252031	0.99	0.993	3.03582e-10	rps24
1.1376e-14	0.884065	0.418	0.292	3.91153e-10	nop53
1.419e-14	3.03789	0.102	0.018	4.8791e-10	LOC101883549
1.73304e-14	1.92222	0.145	0.048	5.9589e-10	si:ch211-197h24.9
1.9e-14	1.06109	0.297	0.174	6.53297e-10	tfe3a
1.91046e-14	2.83372	0.096	0.015	6.56892e-10	mtmr8
2.15782e-14	1.01752	0.329	0.201	7.41946e-10	hlx1
3.48034e-14	4.17362	0.078	0.006	1.19668e-09	tgfbi
3.86995e-14	7.33665	0.066	0	1.33064e-09	p3h1
4.40047e-14	3.68787	0.08	0.007	1.51306e-09	fkbp1ab
6.88117e-14	2.076	0.125	0.036	2.36602e-09	LOC110437941
6.93887e-14	0.300186	0.969	0.977	2.38586e-09	rpl15
8.63569e-14	1.63223	0.262	0.148	2.9693e-09	ved
8.76145e-14	0.485857	0.554	0.411	3.01254e-09	nfkbiab
9.95048e-14	1.03427	0.366	0.245	3.42137e-09	chsy1
1.09548e-13	7.48753	0.063	0	3.76671e-09	mid2
1.24787e-13	0.886175	0.442	0.333	4.29066e-09	hyal3
1.33851e-13	0.241937	0.999	1	4.60234e-09	si:dkey-151g10.6
1.46872e-13	2.63173	0.113	0.026	5.05006e-09	si:dkeyp-85e10.3
1.57335e-13	2.38674	0.11	0.026	5.4098e-09	CR381673.1
1.60119e-13	0.518583	0.662	0.587	5.50552e-09	eif3m
1.99199e-13	0.450981	0.793	0.734	6.84928e-09	mbnl1
2.1453e-13	1.27944	0.215	0.105	7.37639e-09	gadd45ab
2.3099e-13	2.86488	0.086	0.012	7.94237e-09	ugt1a7
2.63289e-13	2.07606	0.125	0.039	9.05292e-09	eif4ebp3
2.95991e-13	1.78362	0.131	0.041	1.01774e-08	BX248510.5
3.12866e-13	1.12566	0.283	0.17	1.07576e-08	ndrg3b
3.49415e-13	0.884375	0.387	0.266	1.20143e-08	triobpa
4.23532e-13	1.03428	0.308	0.195	1.45627e-08	ddx21
4.40705e-13	2.52281	0.087	0.014	1.51532e-08	slc40a1
4.54757e-13	3.61163	0.076	0.009	1.56364e-08	erc2.1
5.39865e-13	0.765772	0.458	0.347	1.85627e-08	stat5a
6.03496e-13	1.22369	0.217	0.111	2.07506e-08	sb:cb81
6.54341e-13	0.924095	0.257	0.137	2.24989e-08	fmo5
9.69586e-13	0.789276	0.363	0.243	3.33383e-08	wasa
1.03025e-12	1.96568	0.141	0.052	3.5424e-08	shc2
1.15398e-12	3.04156	0.1	0.023	3.96783e-08	hes6
1.16107e-12	2.02907	0.102	0.023	3.99222e-08	zgc:172106
1.21269e-12	0.222029	0.995	0.998	4.16973e-08	rpl35
1.68168e-12	0.375	0.864	0.878	5.78229e-08	rpl3
1.74585e-12	2.91001	0.083	0.014	6.00294e-08	LOC108181220
2.10586e-12	7.47002	0.056	0	7.24079e-08	b3gnt2l
2.25732e-12	4.0728	0.067	0.005	7.76158e-08	si:dkey-165a24.10
2.3604e-12	2.55326	0.086	0.017	8.11601e-08	bach2b
2.56869e-12	2.1381	0.093	0.021	8.83217e-08	mgat3a
2.75641e-12	0.927034	0.319	0.207	9.47764e-08	BX005340.1
3.13041e-12	3.961	0.064	0.005	1.07636e-07	NPC2 (1 of many)
3.30146e-12	0.25401	0.993	0.993	1.13518e-07	rps14
3.39087e-12	0.364062	0.831	0.796	1.16592e-07	rpl4
3.48328e-12	0.588882	0.554	0.461	1.19769e-07	prdx2
3.82533e-12	0.960608	0.369	0.257	1.3153e-07	atp1a3a
3.96187e-12	0.330191	0.916	0.91	1.36225e-07	rps18
4.56372e-12	0.3644	0.829	0.794	1.56919e-07	eno3
4.59001e-12	1.59284	0.166	0.074	1.57823e-07	sulf2b
5.75864e-12	1.28208	0.206	0.106	1.98005e-07	zgc:194312
5.95633e-12	2.72516	0.098	0.022	2.04803e-07	tjp1b
6.08709e-12	1.06988	0.269	0.165	2.09299e-07	stat2
6.40031e-12	1.17301	0.179	0.08	2.20068e-07	selp
6.44973e-12	0.654309	0.543	0.457	2.21767e-07	CHST13
7.06581e-12	1.51535	0.145	0.057	2.42951e-07	gig2i
7.37295e-12	0.27524	0.968	0.959	2.53512e-07	rpl7
8.17172e-12	3.60922	0.067	0.006	2.80976e-07	CR381673.2
1.12128e-11	1.75891	0.106	0.031	3.85542e-07	sash3
1.14988e-11	0.772226	0.443	0.346	3.95375e-07	aldh9a1a.1
1.42312e-11	1.26029	0.231	0.134	4.89326e-07	GNAZ
1.44568e-11	1.01799	0.321	0.218	4.97083e-07	fkbp3
1.57062e-11	3.8618	0.062	0.005	5.4004e-07	ggact.2
2.27376e-11	2.45848	0.08	0.015	7.81809e-07	cxxc1a
2.94317e-11	5.4187	0.055	0.001	1.01198e-06	kcnh5a
3.53726e-11	0.294775	0.848	0.809	1.21625e-06	eef2b
3.89078e-11	1.0547	0.258	0.159	1.33781e-06	zmiz1a
4.28799e-11	1.24443	0.216	0.119	1.47438e-06	swap70b
4.30704e-11	0.256838	0.969	0.97	1.48093e-06	rpl27a
4.3647e-11	1.01349	0.299	0.196	1.50076e-06	il12rb2l
5.41828e-11	0.713275	0.435	0.335	1.86302e-06	sarnp
6.81261e-11	0.774312	0.373	0.264	2.34245e-06	midn
6.97808e-11	0.642994	0.418	0.3	2.39934e-06	mknk2b
7.08614e-11	7.07437	0.05	0	2.4365e-06	hhla2a.2
7.41386e-11	1.15336	0.272	0.171	2.54918e-06	lyst
7.85536e-11	2.93238	0.062	0.007	2.70099e-06	rnasekb
7.8894e-11	0.212878	0.968	0.962	2.71269e-06	rpl29
8.11339e-11	2.45481	0.09	0.021	2.78971e-06	CABZ01046432.1
8.85696e-11	2.31275	0.076	0.015	3.04538e-06	prkx
8.88977e-11	2.34422	0.072	0.012	3.05666e-06	isg15
9.34185e-11	1.65998	0.132	0.053	3.2121e-06	gadd45ga
9.40135e-11	0.71835	0.461	0.367	3.23256e-06	vat1
1.03201e-10	1.05438	0.258	0.158	3.54845e-06	kdm6bb
1.04866e-10	0.38029	0.791	0.751	3.60571e-06	ccni
1.09618e-10	2.99121	0.087	0.022	3.76909e-06	thada
1.1561e-10	2.24084	0.109	0.033	3.97513e-06	ighv1-4
1.39961e-10	1.62663	0.139	0.058	4.8124e-06	mctp1b
1.4829e-10	0.875632	0.287	0.182	5.0988e-06	abca2
1.8062e-10	0.584516	0.511	0.424	6.21044e-06	ak2
2.17344e-10	1.48171	0.146	0.063	7.47317e-06	wee2
2.31169e-10	1.13858	0.188	0.095	7.94853e-06	rnf213a
2.40626e-10	1.04309	0.279	0.181	8.27368e-06	LOC103911430
2.87085e-10	1.14538	0.244	0.148	9.87114e-06	fli1b
2.93817e-10	0.336222	0.846	0.818	1.01026e-05	lasp1
3.09933e-10	2.27309	0.094	0.028	1.06567e-05	si:ch211-147a11.3
3.1118e-10	0.80455	0.416	0.323	1.06996e-05	elmo1
3.15645e-10	1.09143	0.263	0.167	1.08531e-05	LOC108179161
4.35443e-10	1.55147	0.117	0.044	1.49723e-05	zgc:174904
4.45472e-10	4.81938	0.051	0.002	1.53171e-05	si:dkey-188g12.1
4.89898e-10	1.2289	0.266	0.18	1.68447e-05	si:dkey-23i12.5
5.37381e-10	3.00126	0.071	0.015	1.84773e-05	CR318588.3
5.42975e-10	0.397467	0.693	0.666	1.86696e-05	mibp2
5.72913e-10	2.26563	0.092	0.026	1.9699e-05	prkag2b
6.23584e-10	1.20106	0.216	0.127	2.14413e-05	unkl
6.85739e-10	2.60305	0.073	0.016	2.35784e-05	lonrf1
7.47751e-10	2.61219	0.076	0.018	2.57107e-05	irgq2
7.66687e-10	2.37958	0.081	0.02	2.63617e-05	heca
8.86547e-10	5.3933	0.049	0.002	3.0483e-05	CU207241.1
8.92151e-10	0.210451	0.982	0.988	3.06757e-05	rps8a
9.53761e-10	3.77697	0.058	0.007	3.27941e-05	si:dkey-237j10.2
1.03369e-09	1.05999	0.174	0.089	3.55425e-05	si:dkey-53k12.1
1.05141e-09	0.878479	0.301	0.193	3.61516e-05	hdac9b
1.11177e-09	2.56574	0.075	0.017	3.8227e-05	cldng
1.1234e-09	0.243032	0.893	0.889	3.86269e-05	ybx1
1.22765e-09	0.561481	0.546	0.47	4.22116e-05	pgd
1.29087e-09	1.34112	0.152	0.075	4.43852e-05	brsk2b
1.38951e-09	1.21116	0.177	0.096	4.7777e-05	asap1b
1.578e-09	0.502518	0.703	0.68	5.42579e-05	tagln2
1.72296e-09	3.25812	0.05	0.004	5.92423e-05	zgc:113208
1.73611e-09	2.37439	0.078	0.018	5.96945e-05	htatip2
1.96325e-09	0.453221	0.598	0.528	6.75045e-05	hsd3b7
2.04926e-09	0.71681	0.294	0.191	7.04617e-05	nfkbiaa
2.64055e-09	0.65429	0.378	0.281	9.07925e-05	RASSF5
2.68191e-09	1.65105	0.13	0.055	9.22148e-05	ptpn11b
2.94538e-09	1.72484	0.107	0.041	0.000101274	ptpn18
3.12432e-09	1.76516	0.109	0.044	0.000107427	chtf8
3.31633e-09	1.62725	0.105	0.037	0.000114029	si:ch211-281l24.3
3.32999e-09	1.30215	0.176	0.099	0.000114498	def8
3.47769e-09	4.69017	0.051	0.005	0.000119577	LOC100333434
3.54e-09	1.30891	0.177	0.097	0.000121719	zmp:0000001114
3.63126e-09	0.82257	0.306	0.213	0.000124857	si:ch211-199g17.2
3.78454e-09	0.802815	0.28	0.179	0.000130128	pik3r1
4.10763e-09	0.792508	0.365	0.278	0.000141237	myb
4.33189e-09	3.91699	0.048	0.004	0.000148948	amotl2b
4.36174e-09	0.722116	0.388	0.296	0.000149974	si:dkey-180p18.9
4.5382e-09	0.641864	0.466	0.378	0.000156041	caprin1b
4.63838e-09	0.80838	0.349	0.257	0.000159486	arhgap33
4.92557e-09	3.18981	0.063	0.011	0.000169361	myclb
5.57745e-09	0.692865	0.397	0.307	0.000191775	cd99
5.6494e-09	1.55425	0.101	0.038	0.000194249	ndfip1l
6.19546e-09	0.310684	0.989	0.99	0.000213025	rps12
7.16997e-09	2.82766	0.059	0.011	0.000246532	cox4i2
8.81302e-09	2.05522	0.09	0.028	0.000303027	ctdsp2
9.63521e-09	1.48689	0.115	0.047	0.000331297	ftr98
1.00333e-08	3.79734	0.043	0.002	0.000344985	si:dkey-19a16.7
1.13132e-08	6.58361	0.038	0	0.000388995	CABZ01072487.1
1.14418e-08	4.88857	0.041	0.001	0.000393414	CR388079.3
1.15448e-08	1.50866	0.122	0.053	0.000396956	gpd1c
1.22904e-08	2.59894	0.068	0.015	0.000422593	arrdc2
1.23502e-08	4.743	0.043	0.002	0.000424649	slc7a2
1.24375e-08	1.34244	0.135	0.064	0.00042765	nmi
1.44769e-08	4.51445	0.043	0.002	0.000497773	tor1l3
1.59249e-08	0.561623	0.548	0.475	0.000547563	sh3bgrl
1.76923e-08	3.80373	0.042	0.002	0.000608331	si:dkey-208m12.2
1.77794e-08	2.15765	0.073	0.021	0.000611327	ssbp2
1.7944e-08	3.62077	0.042	0.002	0.000616986	prr13
1.81058e-08	0.756096	0.295	0.203	0.00062255	rinl
1.81231e-08	3.96155	0.045	0.004	0.000623144	LOC101883382
1.90113e-08	1.58836	0.155	0.085	0.000653684	peak3
2.10385e-08	2.91559	0.064	0.015	0.000723389	pcsk5a
2.27892e-08	1.49896	0.187	0.113	0.000783583	pinx1
2.33052e-08	1.0158	0.252	0.169	0.000801327	si:ch211-197k17.3
2.65096e-08	0.944996	0.145	0.073	0.000911506	phkb
2.67677e-08	1.23319	0.122	0.058	0.000920381	eml3
3.09994e-08	6.72765	0.036	0	0.00106588	si:dkey-169i5.4
3.2003e-08	0.662819	0.421	0.34	0.00110039	cnbpb
3.29262e-08	0.943363	0.278	0.198	0.00113213	sephs2
3.30542e-08	0.314975	0.847	0.825	0.00113654	sms
3.53779e-08	1.43435	0.149	0.079	0.00121643	si:rp71-79p20.2
3.65396e-08	1.70659	0.098	0.039	0.00125638	carhsp1
3.9411e-08	0.205739	0.974	0.984	0.00135511	rps11
4.01251e-08	0.272063	0.832	0.819	0.00137966	arhgdig
4.13315e-08	6.5214	0.035	0	0.00142114	CR388079.1
4.15023e-08	5.1501	0.039	0.001	0.00142702	LOC110439385
4.64075e-08	0.776456	0.381	0.297	0.00159568	gtpbp4
4.85659e-08	1.62677	0.097	0.038	0.00166989	arhgef18b
4.94631e-08	0.923609	0.236	0.156	0.00170074	dedd1
4.95877e-08	4.31535	0.037	0.001	0.00170502	opcml
5.44146e-08	0.781786	0.324	0.241	0.00187099	calm2a
7.11385e-08	0.250312	0.979	0.991	0.00244603	rpl10a
7.12285e-08	2.18606	0.065	0.016	0.00244912	ubald1a
7.13255e-08	1.20596	0.13	0.064	0.00245246	bbip1
7.27302e-08	1.66628	0.109	0.049	0.00250076	vdac1
7.3567e-08	0.762638	0.267	0.18	0.00252953	march8
8.24459e-08	0.846803	0.258	0.176	0.00283482	trib3
8.37539e-08	1.63983	0.101	0.041	0.00287979	jdp2b
9.02698e-08	1.07816	0.139	0.071	0.00310384	nr1d2a
9.30407e-08	2.8102	0.053	0.01	0.00319911	si:dkey-152b24.7
9.93537e-08	1.22979	0.13	0.064	0.00341618	mych
1.03216e-07	0.612201	0.377	0.293	0.00354897	ralgapa2
1.06104e-07	0.260438	0.805	0.78	0.00364827	b2m
1.08273e-07	1.55638	0.094	0.038	0.00372287	oga
1.25285e-07	4.3138	0.038	0.002	0.00430781	si:ch211-1a19.3
1.297e-07	0.248571	0.811	0.803	0.0044596	rps27.2
1.3004e-07	5.05895	0.036	0.001	0.0044713	CABZ01079302.1
1.31097e-07	1.31083	0.136	0.068	0.00450765	rnf13
1.31141e-07	4.24809	0.036	0.004	0.00450916	sftpbb
1.37676e-07	0.53108	0.458	0.384	0.00473386	sgk1
1.52681e-07	0.918475	0.174	0.099	0.00524978	FBXO48
1.532e-07	1.03033	0.16	0.089	0.00526764	gigyf1b
1.57357e-07	2.16585	0.057	0.014	0.00541056	si:dkey-28k24.2
1.62936e-07	3.41172	0.041	0.005	0.00560238	plin2
1.68285e-07	0.546727	0.518	0.462	0.00578631	eif3g
1.70942e-07	2.68136	0.047	0.007	0.00587768	slc25a22a
1.73798e-07	6.34508	0.032	0	0.00597586	zgc:153151
1.74215e-07	1.67738	0.059	0.015	0.00599021	si:ch211-196c10.15
1.86345e-07	2.02634	0.079	0.028	0.00640729	scp2a
1.86733e-07	2.29697	0.055	0.012	0.00642061	slc1a3a
2.08609e-07	1.28462	0.127	0.063	0.00717281	fam49a
2.08919e-07	1.53938	0.112	0.052	0.00718345	rpz2
2.26629e-07	0.965436	0.217	0.142	0.00779242	dnmt3bb.1
2.2677e-07	1.71181	0.07	0.022	0.00779726	arhgap27l
2.28979e-07	0.242663	0.81	0.773	0.00787323	cebpa
2.30793e-07	2.84697	0.061	0.016	0.00793559	cdc42ep2
2.33496e-07	0.849797	0.257	0.174	0.00802854	si:ch211-105j21.9
2.36603e-07	1.6929	0.1	0.042	0.00813535	pdcd4a
2.37946e-07	0.699654	0.357	0.281	0.00818153	qkia
2.3839e-07	5.30622	0.052	0.01	0.00819682	zgc:113984.1
2.40568e-07	1.50556	0.097	0.044	0.00827167	krt18b
2.62764e-07	3.74818	0.042	0.006	0.00903488	qsox1
2.90305e-07	1.31788	0.179	0.106	0.00998186	CU929070.1
3.21223e-07	1.20597	0.145	0.08	0.0110449	inpp4aa
3.39037e-07	1.01096	0.125	0.063	0.0116574	ophn1
3.48599e-07	4.54032	0.037	0.004	0.0119862	sept15
3.51777e-07	1.10392	0.175	0.105	0.0120955	def6a
3.59243e-07	1.1011	0.175	0.107	0.0123522	entpd1
3.63875e-07	1.13612	0.109	0.05	0.0125115	sesn3
3.68826e-07	0.350353	0.661	0.619	0.0126817	btg1
3.68918e-07	1.32561	0.095	0.042	0.0126849	tp53i11b
4.04412e-07	0.398905	0.65	0.61	0.0139053	mapre1a
4.10021e-07	0.436756	0.539	0.482	0.0140982	git2a
4.408e-07	0.855766	0.231	0.156	0.0151565	LOC108183614
4.55533e-07	0.989849	0.138	0.078	0.015663	elmsan1b
4.78129e-07	4.01817	0.036	0.004	0.01644	vil1
5.47222e-07	6.31703	0.03	0	0.0188157	BX465228.1
5.52874e-07	0.939251	0.156	0.084	0.01901	si:ch211-181d7.3
5.62931e-07	1.11258	0.212	0.143	0.0193558	ak1
5.68001e-07	1.63356	0.093	0.041	0.0195302	CU467961.1
6.05911e-07	1.05496	0.174	0.103	0.0208337	mxd1
6.15047e-07	1.70391	0.088	0.038	0.0211478	dnajc19
6.19916e-07	0.845573	0.266	0.185	0.0213152	brdt
6.2333e-07	2.65857	0.04	0.005	0.0214326	rhbdl2
6.5915e-07	3.42693	0.037	0.004	0.0226642	FO904898.1
6.67962e-07	1.54304	0.06	0.017	0.0229672	si:ch211-150o23.2
7.96923e-07	0.53225	0.461	0.389	0.0274014	sumo2b
8.09387e-07	1.17692	0.135	0.071	0.02783	psmb13a
8.83767e-07	0.327678	0.832	0.819	0.0303874	mcl1a
8.90539e-07	1.03333	0.179	0.107	0.0306203	zgc:175088
9.53717e-07	0.959981	0.199	0.127	0.0327926	itga1
9.54714e-07	0.910438	0.136	0.075	0.0328269	btbd11b
9.55254e-07	0.740099	0.305	0.23	0.0328455	naa10
9.88463e-07	0.53054	0.393	0.318	0.0339873	fam49bb
1.0001e-06	1.1953	0.103	0.048	0.0343876	si:zfos-464b6.2
1.14761e-06	1.22292	0.145	0.08	0.0394593	tm7sf3
1.24353e-06	1.81675	0.056	0.016	0.0427574	zgc:165582
1.34807e-06	2.16172	0.063	0.021	0.0463519	med8
1.40308e-06	1.92243	0.057	0.016	0.0482436	plagl2
1.45622e-06	1.17098	0.097	0.046	0.0500706	nfil3-5
1.64876e-06	0.274973	0.718	0.675	0.056691	fam107b
1.79089e-06	3.26067	0.037	0.005	0.0615781	znf576.1
1.7935e-06	1.36858	0.116	0.059	0.0616677	runx3
1.90937e-06	1.58017	0.075	0.028	0.0656518	znf511
2.0459e-06	3.30661	0.034	0.004	0.0703462	gig2j
2.0807e-06	0.895241	0.223	0.158	0.0715429	ubtd2
2.09094e-06	1.16767	0.109	0.053	0.0718948	si:ch211-132g1.3
2.09638e-06	2.46068	0.05	0.014	0.0720818	ampd3b
2.14546e-06	0.467809	0.572	0.53	0.0737697	gmfg
2.20216e-06	0.87813	0.19	0.118	0.0757191	gpatch8
2.21619e-06	1.6895	0.067	0.022	0.0762015	cmtm8a
2.27664e-06	1.60268	0.101	0.048	0.07828	cep131
2.40432e-06	1.72043	0.065	0.022	0.0826701	smim14
2.46483e-06	1.92905	0.064	0.022	0.0847508	epor
2.66983e-06	0.891939	0.158	0.095	0.0917995	nol4la
2.6745e-06	1.31317	0.102	0.048	0.0919601	aldh2.2
2.73692e-06	1.26847	0.098	0.047	0.0941064	pde4ca
3.07768e-06	0.767624	0.184	0.117	0.105823	pkn1b
3.09682e-06	1.00135	0.124	0.068	0.106481	CABZ01026153.1
3.31717e-06	1.16206	0.102	0.052	0.114058	cables2b
3.32335e-06	1.63688	0.079	0.033	0.11427	ulk1a
3.73388e-06	0.343659	0.707	0.7	0.128386	sri
3.77046e-06	0.26427	0.785	0.784	0.129643	rpl5b
3.77338e-06	1.30177	0.113	0.06	0.129744	stk35
3.88469e-06	2.35962	0.035	0.005	0.133571	klhl24a
3.98765e-06	3.60441	0.035	0.005	0.137111	LOC110440216
4.01834e-06	0.751648	0.273	0.203	0.138167	dusp6
4.44223e-06	1.05251	0.116	0.063	0.152742	tnfaip8l2b
4.5083e-06	0.703337	0.29	0.222	0.155013	ppp1r14aa
4.78681e-06	3.1566	0.035	0.005	0.16459	zmp:0000000991
4.8809e-06	1.0757	0.157	0.099	0.167825	gusb
4.97108e-06	0.823933	0.351	0.278	0.170926	si:ch1073-67j19.1
5.01319e-06	3.6964	0.036	0.006	0.172374	LOC101884484
5.10316e-06	2.45099	0.043	0.01	0.175467	lgals17
5.16027e-06	0.864107	0.209	0.143	0.177431	CABZ01073834.1
5.20546e-06	2.44011	0.047	0.012	0.178985	znf1001
5.78167e-06	0.277813	0.764	0.743	0.198797	id3
6.14523e-06	0.523814	0.417	0.358	0.211298	tpd52
6.20219e-06	5.71072	0.027	0.001	0.213256	zgc:194627
6.23998e-06	1.08484	0.135	0.078	0.214555	BX322587.1
6.33355e-06	0.381796	0.735	0.744	0.217773	scinlb
6.36174e-06	2.03094	0.06	0.022	0.218742	CABZ01046427.2
7.19914e-06	6.1631	0.023	0	0.247535	ggctb
7.19914e-06	6.01059	0.024	0	0.247535	itsn2a
7.26e-06	1.77678	0.055	0.017	0.249628	opn8c
7.62985e-06	1.31909	0.08	0.036	0.262345	nrbp2a
7.6699e-06	1.74681	0.061	0.022	0.263722	LOC101886030
7.78034e-06	2.00154	0.036	0.006	0.267519	fuom
8.59471e-06	1.01427	0.125	0.069	0.29552	galm
9.031e-06	2.7453	0.037	0.007	0.310522	p2ry8
9.14276e-06	0.883174	0.219	0.154	0.314365	camkk1a
9.15901e-06	3.91583	0.028	0.002	0.314923	zgc:171500
9.17347e-06	0.834678	0.155	0.096	0.315421	SLC46A3 (1 of many)
9.3322e-06	2.06605	0.054	0.017	0.320878	tpst2
9.58305e-06	1.52527	0.044	0.011	0.329503	LOC108181885
9.58381e-06	0.685804	0.329	0.26	0.32953	csgalnact1a
1.03101e-05	0.250505	0.724	0.704	0.354501	b2ml
1.0526e-05	4.00922	0.028	0.002	0.361927	ap1g2
1.08364e-05	3.65016	0.036	0.006	0.372598	zgc:174931
1.10035e-05	5.09762	0.026	0.001	0.378343	ptprh
1.17047e-05	0.909276	0.121	0.068	0.402456	tmcc3
1.22197e-05	2.00092	0.049	0.015	0.420163	lrmp
1.23058e-05	1.82602	0.057	0.02	0.423122	stx3a
1.23858e-05	3.33558	0.028	0.002	0.425873	gabbr1a
1.23951e-05	3.92133	0.029	0.004	0.426192	exosc3
1.31633e-05	3.74324	0.026	0.001	0.452607	CABZ01072487.2
1.33213e-05	2.73534	0.032	0.005	0.458039	acot11a
1.41461e-05	1.93249	0.046	0.014	0.486398	znf644a
1.41714e-05	2.058	0.052	0.017	0.48727	kat2b
1.43663e-05	1.61798	0.069	0.031	0.493971	si:dkey-262k9.2
1.44526e-05	2.50589	0.036	0.007	0.496939	ank2b
1.46412e-05	2.50375	0.037	0.006	0.503422	si:ch211-260e23.9
1.49744e-05	1.36865	0.082	0.038	0.51488	limk1a
1.58517e-05	1.47577	0.057	0.021	0.545046	LOC100538052
1.58907e-05	2.09649	0.041	0.01	0.546386	steap4
1.61637e-05	0.799106	0.188	0.126	0.555772	slmapa
1.67046e-05	3.21531	0.036	0.007	0.574369	st6galnac5b
1.70415e-05	0.806598	0.172	0.111	0.585955	pik3r5
1.73033e-05	2.77668	0.032	0.005	0.594956	epob
1.77861e-05	0.91133	0.265	0.209	0.611557	ube4b
1.78856e-05	2.23496	0.042	0.01	0.614977	si:ch211-79k12.1
1.89512e-05	1.82168	0.039	0.01	0.651618	rhobtb4
1.97552e-05	1.43807	0.057	0.021	0.679263	pvalb7
2.12751e-05	0.990588	0.139	0.086	0.731523	coq8a
2.13045e-05	0.573398	0.204	0.139	0.732534	LOC110438004
2.14079e-05	0.716545	0.179	0.119	0.736089	rps27l
2.18667e-05	3.22523	0.031	0.005	0.751865	mov10b.2
2.22643e-05	0.933657	0.185	0.128	0.765536	si:dkey-188i13.10
2.27146e-05	2.84547	0.031	0.005	0.781017	mark4a
2.36434e-05	1.58243	0.056	0.021	0.812955	smc5
2.39126e-05	2.51255	0.033	0.007	0.822209	ptger4b
2.47652e-05	0.935366	0.129	0.078	0.851527	tmed5
2.54881e-05	1.35926	0.061	0.023	0.876383	cnot6l
2.65949e-05	0.976574	0.118	0.068	0.91444	pycard
2.70066e-05	0.653426	0.215	0.154	0.928596	mboat2a
2.76288e-05	1.16608	0.089	0.043	0.94999	selenoj
2.83512e-05	0.838576	0.176	0.122	0.974828	bloc1s6
2.86178e-05	1.68933	0.061	0.026	0.983995	tfdp1a
2.86564e-05	1.15172	0.104	0.059	0.985321	grb10b
2.96826e-05	3.23135	0.028	0.004	1	mbd1a
2.98228e-05	3.19482	0.027	0.004	1	tsen15
2.99691e-05	0.828432	0.14	0.087	1	scap
3.10644e-05	2.43368	0.03	0.005	1	secisbp2
3.13668e-05	1.38863	0.051	0.017	1	dpy19l3
3.30885e-05	4.09317	0.028	0.004	1	doc2d
3.36336e-05	0.466446	0.403	0.336	1	itm2ba
3.4167e-05	1.70163	0.069	0.03	1	rc3h2
3.43034e-05	1.83102	0.047	0.015	1	DGKI
3.4636e-05	1.1705	0.105	0.059	1	ppp4r1
3.46582e-05	1.82387	0.051	0.017	1	esyt1b
3.50147e-05	2.25651	0.031	0.006	1	slc25a32a
3.57964e-05	1.62587	0.066	0.03	1	mgrn1b
3.67544e-05	0.45913	0.401	0.34	1	tagapb
3.68488e-05	0.758853	0.167	0.108	1	slc1a5
3.7435e-05	0.828867	0.149	0.096	1	skia
3.78978e-05	3.82748	0.027	0.004	1	eml1
3.89796e-05	3.14954	0.026	0.002	1	tnfsf18
4.07799e-05	2.85281	0.035	0.007	1	xkrx
4.1271e-05	0.898206	0.159	0.1	1	calm1a
4.14896e-05	2.14705	0.029	0.005	1	rufy2
4.18814e-05	1.79922	0.035	0.009	1	tcf12
4.63268e-05	5.73888	0.02	0	1	LOC100004944
4.66959e-05	0.867739	0.146	0.094	1	psmb9a
4.74171e-05	3.58835	0.022	0.001	1	sh2d1ab
4.87356e-05	1.0135	0.143	0.092	1	ubald2
4.89034e-05	0.266022	0.791	0.788	1	rpl6
4.90136e-05	1.67359	0.053	0.02	1	LOC103910909
5.1329e-05	0.947425	0.129	0.079	1	fgfr1op2
5.25052e-05	0.489104	0.293	0.227	1	rasgef1ba
5.25069e-05	1.90959	0.042	0.012	1	zc4h2
5.30779e-05	1.44614	0.061	0.025	1	terfa
5.43856e-05	0.963709	0.16	0.103	1	nr3c1
5.44685e-05	0.678699	0.308	0.254	1	LOC110438237
5.62902e-05	2.13819	0.047	0.016	1	nkd1
5.77212e-05	2.21276	0.044	0.015	1	cdk4
5.86103e-05	2.79322	0.033	0.007	1	matk
5.92024e-05	0.837001	0.119	0.071	1	pcsk5b
6.08315e-05	1.0694	0.09	0.049	1	afap1l1b
6.1353e-05	1.31416	0.089	0.048	1	braf
6.2817e-05	0.395017	0.526	0.483	1	gabarapb
6.32864e-05	1.26936	0.09	0.049	1	ppp1r9a
6.75154e-05	1.62964	0.032	0.007	1	sgms1
6.75407e-05	0.535694	0.371	0.318	1	anp32a
6.87706e-05	2.92447	0.032	0.006	1	nrxn2a
6.96637e-05	1.82312	0.041	0.012	1	pkp4
7.12387e-05	5.87375	0.019	0	1	fam84a
7.12387e-05	5.21203	0.018	0	1	stat1b
7.25547e-05	0.523222	0.31	0.248	1	cnksr1
7.37661e-05	2.03894	0.05	0.018	1	rbm38
7.453e-05	0.419717	0.558	0.53	1	ldhba
7.53666e-05	1.45725	0.08	0.041	1	si:dkey-92i15.4
7.83568e-05	1.99403	0.035	0.01	1	si:ch1073-358c10.1
7.85436e-05	3.46248	0.026	0.004	1	ypel3
8.27004e-05	4.10605	0.02	0.001	1	calcrla
8.32808e-05	1.43718	0.064	0.028	1	cspp1b
8.52916e-05	2.09546	0.04	0.012	1	zc3h7ba
8.54905e-05	2.13381	0.045	0.016	1	si:ch211-119e14.1
8.5775e-05	1.1451	0.083	0.043	1	ing3
8.60844e-05	1.02574	0.112	0.068	1	ptgs1
8.62112e-05	1.94526	0.039	0.011	1	pmp22b
8.73108e-05	0.322898	0.689	0.677	1	tln1
8.79559e-05	4.05082	0.023	0.002	1	ggact.3
8.80539e-05	1.29162	0.047	0.017	1	cdkn1d
8.83758e-05	3.2125	0.028	0.004	1	hs6st1a
8.8839e-05	1.31175	0.074	0.036	1	msl2b
9.53869e-05	1.14556	0.068	0.032	1	cdc42ep4a
9.63116e-05	0.773556	0.165	0.11	1	foxp1b
9.68691e-05	1.50388	0.079	0.042	1	fer
9.70372e-05	0.486301	0.439	0.383	1	eif3d
9.91132e-05	0.608296	0.211	0.155	1	map2k6
9.93192e-05	0.774343	0.188	0.135	1	wipf1b
9.94588e-05	0.604648	0.17	0.116	1	pqlc2
0.000101298	1.69998	0.053	0.021	1	znf618
0.000103014	1.26332	0.047	0.017	1	LOC100330186
0.00010619	1.50699	0.046	0.017	1	ptpra
0.000106523	2.58564	0.033	0.009	1	acacb
0.000107292	1.38152	0.081	0.042	1	creb1a
0.000109176	1.12897	0.09	0.05	1	atp11a
0.000109595	5.7568	0.018	0	1	rnd2
0.000115456	0.788521	0.165	0.111	1	chsy3
0.000120098	1.873	0.051	0.021	1	si:dkey-9i23.15
0.000121574	3.10997	0.024	0.004	1	nme2b.2
0.000121882	1.13524	0.101	0.057	1	arap3
0.000125587	1.92968	0.041	0.012	1	rab6bb
0.000127844	0.934782	0.14	0.091	1	vps26a
0.000132709	2.18893	0.029	0.006	1	st6gal2b
0.000135863	0.443482	0.402	0.342	1	ATP11B
0.000136062	1.1718	0.079	0.042	1	dcp2
0.000139907	2.07534	0.038	0.012	1	BX649411.2
0.000140214	1.23842	0.109	0.068	1	cenpx
0.000144601	1.31359	0.052	0.021	1	FQ976913.1
0.000146094	5.23943	0.017	0	1	tjp2b
0.000153478	1.20573	0.059	0.027	1	ciarta
0.000161661	0.621331	0.289	0.233	1	rgs13
0.000163204	0.695015	0.22	0.167	1	CT027744.2
0.000164887	0.647934	0.212	0.159	1	cdc26
0.000165447	1.61662	0.059	0.027	1	phf2
0.000167354	1.9146	0.036	0.01	1	LOC101885027
0.00016824	4.76809	0.018	0.001	1	FQ323156.1
0.000177043	0.406659	0.441	0.379	1	eif3ha
0.000179719	0.525769	0.362	0.305	1	fam162a
0.000181885	0.633158	0.298	0.244	1	arhgap15
0.000184488	1.39157	0.051	0.022	1	si:dkey-217l24.1
0.000186765	1.18374	0.065	0.032	1	klf9
0.000187334	0.97647	0.074	0.037	1	crebl2
0.000194803	5.14316	0.017	0	1	si:ch211-281g13.4
0.000198977	1.08954	0.083	0.047	1	slc44a1b
0.000200964	0.76437	0.169	0.118	1	ralgapa1
0.00020851	0.626438	0.24	0.185	1	agtrap
0.000209454	1.32676	0.084	0.047	1	CABZ01077218.1
0.000212682	2.43223	0.025	0.005	1	ypel1
0.0002144	0.911987	0.102	0.062	1	ncoa2
0.000216068	1.10454	0.074	0.038	1	si:dkey-42l23.9
0.000220806	0.234424	0.941	0.942	1	hbba1
0.000221846	1.60482	0.046	0.018	1	ier5l
0.000223543	0.956374	0.13	0.084	1	lnpep
0.000225579	1.75598	0.036	0.011	1	sfi1
0.000225602	1.72004	0.041	0.015	1	rnf166
0.000226315	0.627734	0.535	0.516	1	si:ch73-1a9.3
0.000230817	1.44989	0.054	0.025	1	CRACR2A
0.000234695	0.764273	0.148	0.101	1	fbxw7
0.000239105	0.674084	0.177	0.121	1	btg2
0.000241259	3.85152	0.02	0.001	1	plp1b
0.000241624	3.48711	0.021	0.002	1	plppr2b
0.000245999	2.0345	0.031	0.009	1	mbd4
0.000250762	0.674684	0.201	0.148	1	itpk1b
0.000255953	0.839073	0.131	0.086	1	zgc:175214
0.000258464	4.67332	0.019	0.001	1	si:dkey-182g1.6
0.000259834	4.92529	0.016	0	1	ccdc169
0.000262426	1.05076	0.091	0.05	1	kif1bp
0.000272757	1.62602	0.067	0.032	1	brms1
0.000276253	0.825884	0.145	0.1	1	rps6ka5
0.000280978	1.12303	0.065	0.031	1	bnip3lb
0.000285017	2.8132	0.02	0.002	1	nr4a3
0.000288549	2.81632	0.028	0.006	1	FP102192.2
0.000290244	1.49597	0.055	0.025	1	trim44
0.000294208	0.317272	0.579	0.552	1	alox5a
0.000298495	1.10979	0.095	0.057	1	erg
0.000300126	5.50752	0.016	0	1	amt
0.000300126	4.917	0.016	0	1	prox1a
0.000304294	3.52343	0.018	0.001	1	acyp1
0.000305538	3.2871	0.025	0.004	1	fblim1
0.000315511	0.561063	0.247	0.195	1	arhgap4b
0.000325442	1.13975	0.068	0.033	1	si:dkey-57k2.7
0.000325854	1.91403	0.091	0.052	1	stmn1a
0.000327157	1.46562	0.053	0.021	1	tmem39b
0.000328412	0.713029	0.189	0.137	1	cers1
0.000356206	2.78066	0.025	0.005	1	CR550302.2
0.000356587	0.970473	0.152	0.108	1	zeb1a
0.000358652	1.33409	0.072	0.037	1	nexmifb
0.000365657	0.427513	0.321	0.257	1	cmip
0.000366513	3.28413	0.022	0.004	1	si:ch1073-188e1.1
0.000367301	0.741637	0.093	0.054	1	cetn4
0.000371004	1.37663	0.066	0.033	1	tab1
0.00037299	3.11746	0.018	0.002	1	ppp2r2bb
0.000378612	0.906475	0.071	0.038	1	CU633775.1
0.000379326	2.62474	0.02	0.002	1	rnf11a
0.000414086	1.75759	0.04	0.015	1	si:dkey-239i20.2
0.00042015	4.23677	0.019	0.001	1	LOC100535806
0.000422358	0.932238	0.123	0.081	1	CU639397.1
0.000425435	1.29634	0.072	0.038	1	cgrrf1
0.00042836	1.82085	0.029	0.007	1	LOC103909840
0.00042905	1.43846	0.064	0.033	1	parp12b
0.000439599	1.13171	0.067	0.034	1	cecr2
0.00043996	1.42644	0.028	0.007	1	sirt3
0.000454105	0.997298	0.054	0.025	1	CABZ01070631.1
0.000459176	0.765568	0.203	0.154	1	klhl6
0.000460274	2.18085	0.037	0.014	1	si:dkeyp-69b9.6
0.000462797	5.40329	0.015	0	1	syt9b
0.000463951	0.947619	0.088	0.052	1	zgc:100846
0.000463965	2.24112	0.046	0.021	1	LOC100330864
0.000474507	1.04143	0.071	0.038	1	zgc:85932
0.000480081	0.453872	0.405	0.353	1	ptbp3
0.000485802	1.87206	0.055	0.026	1	si:ch73-335l21.1
0.000495777	0.766073	0.19	0.142	1	tprg1l
0.000496948	2.39661	0.021	0.004	1	gdpd5b
0.000498938	1.54246	0.032	0.01	1	lrrk1
0.000499178	1.41853	0.07	0.037	1	arhgap17a
0.000502583	2.23015	0.016	0.002	1	ms4a17a.6
0.000504706	0.48405	0.23	0.17	1	NAV1 (1 of many)
0.000506211	2.52857	0.02	0.002	1	prickle2a
0.000512791	1.04948	0.096	0.059	1	crebrf
0.000519371	2.13649	0.026	0.006	1	si:ch211-225b7.5
0.000528161	1.19943	0.084	0.049	1	arrdc3a
0.000534789	5.02244	0.014	0	1	zgc:171490
0.000543603	1.34008	0.055	0.026	1	plekhg5b
0.000544157	1.4649	0.043	0.016	1	si:dkey-75a21.2
0.000545376	0.81288	0.096	0.059	1	pbxip1b
0.0005488	2.30106	0.023	0.005	1	crtc1a
0.000552383	1.19371	0.04	0.016	1	TMEM19
0.000568435	0.981851	0.082	0.046	1	slc38a5b
0.000575259	1.55221	0.031	0.01	1	LOC110438323
0.000576984	1.02184	0.104	0.064	1	cdk5rap2
0.000583213	1.03082	0.117	0.076	1	BX957297.2
0.000587854	1.01311	0.116	0.079	1	mapk14a
0.000596708	1.18061	0.054	0.026	1	si:dkey-261h17.1
0.000605881	1.03155	0.075	0.043	1	cast
0.000618058	5.04684	0.014	0	1	CR392001.3
0.000647873	3.8326	0.018	0.002	1	tapbp.2
0.000660192	0.355124	0.272	0.22	1	ppdpfb
0.000665137	2.74244	0.019	0.002	1	BX323593.1
0.000682661	1.27793	0.061	0.03	1	LOC101884253
0.000682769	1.16097	0.091	0.058	1	ncoa6
0.000684625	2.04669	0.031	0.01	1	pcmtd1
0.000691999	0.897691	0.033	0.011	1	celf3a
0.00070819	5.08356	0.016	0	1	CR382337.3
0.000712289	0.529385	0.302	0.246	1	ddit3
0.000714387	5.54422	0.014	0	1	LOC101883036
0.000717812	0.658608	0.197	0.148	1	acss2
0.000718646	0.881559	0.083	0.048	1	sc:d156
0.000719448	0.601199	0.251	0.203	1	ncalda
0.000733437	0.822177	0.094	0.058	1	orai1a
0.00073735	1.4598	0.043	0.02	1	ddit4
0.000748038	0.808389	0.099	0.063	1	vps37b
0.000755022	1.71026	0.035	0.012	1	neil3
0.000761433	1.21921	0.045	0.02	1	arrdc3b
0.000766143	2.24921	0.025	0.006	1	mdm1
0.000771691	1.396	0.048	0.022	1	ccdc137
0.000779494	1.49322	0.034	0.012	1	brd1a
0.00078267	0.895931	0.104	0.067	1	eif1ad
0.000792641	1.47721	0.03	0.01	1	yeats2
0.000794714	0.876849	0.11	0.073	1	fam43a
0.000795999	0.965761	0.09	0.055	1	rab21
0.000812314	1.31539	0.059	0.027	1	srpk1a
0.000818713	1.53842	0.054	0.026	1	abat
0.000835134	0.949185	0.111	0.069	1	tob1a
0.000846326	3.34615	0.02	0.004	1	foxq1a
0.00085629	0.481955	0.396	0.361	1	actn1
0.000858881	1.06785	0.048	0.021	1	stau1
0.000861264	2.02769	0.039	0.014	1	tcf7l2
0.000867841	3.37041	0.017	0.002	1	cmbl
0.000872994	0.668468	0.113	0.073	1	zfp36l1a
0.000874727	0.248546	0.895	0.884	1	hbaa1
0.000887443	0.608529	0.256	0.207	1	sema4aa
0.000913074	0.851074	0.116	0.076	1	ino80c
0.00092002	0.823344	0.069	0.037	1	ushbp1
0.000944817	5.41079	0.016	0	1	CR792438.2
0.000954837	5.26627	0.013	0	1	CR339041.3
0.000954838	2.21735	0.022	0.005	1	zgc:103510
0.000973189	0.465817	0.331	0.278	1	nrros
0.000983703	0.303123	0.41	0.352	1	fam117bb
0.000984044	0.588683	0.188	0.142	1	rock2a
0.000984903	3.79861	0.018	0.002	1	LOC100537930
0.0009853	3.03334	0.02	0.004	1	cpxm1b
0.000995505	3.21994	0.018	0.002	1	gig2g
0.000998996	0.700947	0.144	0.101	1	pim2
0.00100969	0.490125	0.342	0.297	1	inpp5d
0.00101881	0.632121	0.193	0.149	1	uvrag
0.00102276	0.375655	0.441	0.401	1	eif2s3
0.00104371	0.245548	0.642	0.638	1	actn4
0.00104372	0.715291	0.116	0.075	1	zgc:55262
0.00108474	0.483065	0.423	0.389	1	hcls1
0.00108802	1.22509	0.059	0.03	1	snapin
0.00110415	5.00185	0.012	0	1	CR352226.5
0.00110415	4.63947	0.013	0	1	pter
0.00110415	5.38231	0.013	0	1	ndr2
0.00110507	0.687372	0.167	0.123	1	BX548046.2
0.0011075	0.361518	0.514	0.477	1	FAR2
0.00111517	3.12114	0.015	0.001	1	si:dkey-17m8.2
0.00111869	1.12008	0.094	0.06	1	pdik1l
0.00112939	0.372084	0.383	0.328	1	eif3s10
0.00114138	1.33767	0.07	0.042	1	csf1rb
0.00115927	2.15378	0.024	0.006	1	spef2
0.0011594	1.15821	0.06	0.033	1	jun
0.00117021	1.16589	0.073	0.042	1	tssc4
0.00117218	2.68455	0.017	0.002	1	zgc:165583
0.00118653	0.69011	0.209	0.165	1	pno1
0.0011987	0.504188	0.386	0.357	1	gpx4b
0.0012119	1.57942	0.028	0.009	1	kdm4c
0.00123183	0.64628	0.178	0.133	1	csk
0.00123582	0.592466	0.198	0.154	1	cnot6a
0.00125346	0.309848	0.492	0.454	1	limd2
0.00126532	0.724057	0.175	0.134	1	klf7b
0.00127351	0.426388	0.452	0.427	1	fabp3
0.00128338	0.930778	0.058	0.031	1	phf11
0.00128555	0.630447	0.129	0.086	1	si:ch211-142c4.1
0.00131359	2.70407	0.019	0.004	1	si:dkey-97l20.6
0.0013242	0.241578	0.64	0.626	1	lta4h
0.00134016	1.90133	0.025	0.007	1	rorca
0.00134867	0.821186	0.165	0.127	1	abi3a
0.00135183	2.54955	0.016	0.002	1	scinla
0.00135877	0.753751	0.145	0.102	1	sort1b
0.00136292	0.626608	0.204	0.158	1	abo
0.00137565	0.817089	0.117	0.08	1	bnipl
0.00138376	1.35556	0.019	0.004	1	CABZ01021532.1
0.00139156	0.784989	0.074	0.043	1	ppm1k
0.00139375	0.798708	0.148	0.108	1	LOC558761
0.00139811	2.78071	0.021	0.005	1	CU695223.1
0.00141496	1.98986	0.034	0.014	1	si:dkeyp-68b7.7
0.00141954	0.586948	0.19	0.144	1	mbnl3
0.00142652	0.676997	0.189	0.142	1	map2k2a
0.00143308	3.01512	0.023	0.006	1	irf2bp2b
0.00143698	1.47625	0.036	0.015	1	LOC110437825
0.00143862	0.462632	0.314	0.267	1	ndufb3
0.00144953	2.10726	0.029	0.01	1	kcnj5
0.00145699	2.62226	0.026	0.006	1	dbn1
0.00146964	1.15832	0.068	0.039	1	per1a
0.00147558	0.651279	0.17	0.128	1	rasal3
0.00147761	0.378405	0.469	0.435	1	svild
0.00153041	2.05116	0.018	0.004	1	vash2
0.00153535	1.36687	0.038	0.016	1	CU639469.1
0.00153558	1.54681	0.029	0.01	1	CR383662.1
0.0015357	1.42349	0.047	0.021	1	elmsan1a
0.00153718	2.25331	0.019	0.004	1	CR855865.1
0.00154166	2.88348	0.017	0.002	1	CU929359.2
0.00155689	0.912375	0.065	0.038	1	ctss2.2
0.00156279	0.565396	0.152	0.108	1	nt5dc2
0.00156772	0.641989	0.128	0.084	1	sqstm1
0.00157369	0.596897	0.049	0.025	1	nr1d4a
0.00158261	1.51419	0.024	0.007	1	nr2c2
0.00161079	2.51466	0.021	0.005	1	SYNDIG1
0.00162785	0.875915	0.092	0.058	1	si:ch211-194c3.5
0.00164734	0.490986	0.237	0.188	1	si:dkey-56i24.1
0.0016551	2.16268	0.021	0.005	1	LOC108183319
0.00166414	0.712872	0.136	0.096	1	arl6ip5b
0.00167742	1.79393	0.036	0.014	1	pctp
0.0016857	0.931058	0.067	0.038	1	atpv0e2
0.00173001	2.87863	0.019	0.004	1	LO018107.1
0.0017376	0.867171	0.096	0.063	1	arhgap1
0.00177254	0.565795	0.169	0.126	1	tmub2
0.00178539	1.5496	0.027	0.009	1	rgmd
0.00186253	0.80337	0.067	0.037	1	mfhas1
0.00186713	0.815277	0.124	0.089	1	uqcrc2a
0.0018727	1.19642	0.032	0.011	1	ngrn
0.00188482	1.70996	0.051	0.026	1	nfil3-2
0.0018877	0.552765	0.259	0.213	1	zdhhc8b
0.00188798	1.294	0.06	0.033	1	si:ch211-86h15.1
0.00189126	0.477434	0.34	0.297	1	s1pr4
0.00189355	0.744804	0.099	0.065	1	gatc
0.00195675	3.21585	0.018	0.004	1	sgcd
0.00195773	0.749644	0.1	0.063	1	eif4a2
0.00197561	1.15046	0.078	0.049	1	si:dkey-239h2.3
0.00197797	4.75925	0.011	0	1	pomgnt2
0.00197797	4.92274	0.012	0	1	FO704777.1
0.0019801	1.47309	0.069	0.039	1	rimkla
0.00198268	1.24346	0.043	0.021	1	gadd45bb
0.00199597	2.42995	0.014	0.001	1	ap1s3b
0.00199725	2.71865	0.014	0.001	1	zgc:194655
0.00200399	1.16427	0.06	0.033	1	tspan4b
0.00200427	4.53616	0.017	0.001	1	bnip4
0.00203197	0.967113	0.065	0.038	1	aclya
0.00204234	3.16073	0.016	0.002	1	LOC110438348
0.00204671	0.854067	0.091	0.059	1	zgc:136439
0.00206482	1.094	0.045	0.022	1	si:ch73-92i20.1
0.00207096	0.445241	0.269	0.218	1	si:ch211-13k12.2
0.00207569	0.568433	0.074	0.044	1	runx1
0.0020757	1.03018	0.132	0.096	1	FP085398.1
0.00208597	1.96403	0.016	0.002	1	si:dkeyp-75h12.2
0.00208653	0.993488	0.024	0.01	1	PDE3B
0.00209295	0.535423	0.209	0.165	1	nfic
0.00210334	0.723953	0.115	0.079	1	arhgap27
0.00211609	0.810625	0.18	0.138	1	vbp1
0.00212853	0.662384	0.147	0.108	1	adam8b
0.00214753	2.47676	0.02	0.004	1	klhl24b
0.00216503	0.556895	0.154	0.112	1	klc1a
0.00217454	0.544723	0.113	0.076	1	ablim1a
0.00217755	0.876397	0.087	0.055	1	jag1b
0.00222677	0.432601	0.169	0.126	1	ivns1abpa
0.00225479	4.86032	0.014	0	1	arhgef9b
0.00225551	4.42466	0.014	0.001	1	ctsl.1
0.00226853	0.564342	0.154	0.115	1	gigyf1a
0.00227577	3.31513	0.014	0.001	1	si:dkey-244a7.1
0.00228123	0.79053	0.122	0.085	1	hip1
0.00228167	2.65094	0.017	0.004	1	rnd3b
0.00228951	4.6781	0.011	0	1	tdp2a
0.00230032	1.16805	0.069	0.039	1	slc35a4
0.00230984	0.5184	0.312	0.271	1	bdh1
0.00234241	1.28703	0.05	0.026	1	PLBD2
0.00239106	1.46165	0.036	0.016	1	tbcelb
0.00239374	1.26363	0.055	0.03	1	znf384l
0.00241917	2.44436	0.026	0.009	1	zgc:114123
0.00242706	0.485059	0.344	0.305	1	arrb2b
0.00243478	0.691574	0.216	0.177	1	atrnl1b
0.00247931	0.89822	0.04	0.018	1	map4k3b
0.00248646	0.48002	0.138	0.097	1	s1pr2
0.00250384	1.29632	0.033	0.014	1	si:dkey-184a18.5
0.00252951	0.69106	0.104	0.069	1	prkd3
0.00264478	1.22194	0.043	0.021	1	rufy3
0.00265074	5.00531	0.011	0	1	CU651669.1
0.00265599	1.50757	0.054	0.03	1	si:ch211-222k6.3
0.00266906	2.48859	0.014	0.001	1	LOC100537163
0.00271714	2.82739	0.016	0.002	1	CU571318.1
0.00273243	1.93594	0.027	0.01	1	dcun1d4
0.00273306	2.73816	0.016	0.002	1	tcp11l2
0.00277591	1.13488	0.043	0.021	1	tsr3
0.00278353	1.47787	0.034	0.015	1	skap1
0.00279708	2.07689	0.042	0.02	1	rgn
0.00281215	2.18138	0.026	0.009	1	zgc:123105
0.00282012	0.420236	0.256	0.211	1	adora2b
0.002863	1.83807	0.025	0.009	1	si:ch211-227e10.3
0.00288746	2.11339	0.029	0.011	1	zbtb22a
0.00289622	1.20113	0.053	0.028	1	mpp1
0.00292579	0.905364	0.108	0.073	1	polr1d
0.00293145	1.60051	0.04	0.018	1	zbtb41
0.00297339	0.87569	0.073	0.044	1	gpat3
0.00301163	1.1398	0.048	0.023	1	slc25a36a
0.00305352	0.407024	0.363	0.318	1	si:ch73-234b20.5
0.0030617	0.907499	0.08	0.048	1	hivep2a
0.0030637	3.10412	0.013	0.001	1	igf2bp3
0.00306974	5.11583	0.01	0	1	si:dkey-152b24.8
0.00306974	4.61423	0.011	0	1	ogg1
0.00306974	4.55995	0.011	0	1	si:dkey-88e18.2
0.00306974	4.49849	0.01	0	1	fam167ab
0.00311777	3.07994	0.015	0.002	1	auts2a
0.00314803	0.83294	0.087	0.055	1	cldn15lb
0.0031902	1.85805	0.039	0.017	1	ada2a
0.00319685	1.01577	0.07	0.043	1	ralgps1
0.00322485	1.00271	0.077	0.048	1	zgc:152774
0.00323757	0.809204	0.042	0.022	1	aspm
0.00327214	0.392436	0.414	0.376	1	wdr1
0.00331521	1.98795	0.021	0.006	1	cbx4
0.00337648	1.63836	0.03	0.014	1	rcan2
0.00339629	1.61842	0.033	0.014	1	LOC110438250
0.00347826	0.630408	0.035	0.016	1	hbp1
0.00351485	1.00591	0.048	0.026	1	si:ch211-91p5.3
0.0035173	1.88314	0.03	0.012	1	cbx7b
0.00354001	0.760317	0.099	0.065	1	map2k4a
0.00355331	2.86446	0.012	0.001	1	zgc:113090
0.00355592	4.81418	0.01	0	1	BX511021.1
0.00355592	4.69788	0.01	0	1	BX511034.1
0.00355592	4.93398	0.01	0	1	CR855389.1
0.00355592	4.77664	0.01	0	1	zgc:171566
0.00356938	3.10226	0.015	0.002	1	c19h1orf109
0.00360067	3.29737	0.014	0.001	1	si:dkey-58f10.12
0.0036449	2.24727	0.015	0.002	1	nudt13
0.00365157	0.802239	0.133	0.097	1	dyrk1b
0.00366613	2.34896	0.015	0.002	1	si:dkey-84h14.1
0.00367374	2.28209	0.023	0.007	1	omgb
0.0036939	1.77494	0.014	0.002	1	osmr
0.00370591	0.824452	0.066	0.041	1	mxd4
0.00371009	1.76149	0.024	0.009	1	slc5a8l
0.00374852	0.992428	0.035	0.017	1	ext1a
0.00375864	0.475113	0.301	0.266	1	nbeal2
0.00380346	1.10644	0.053	0.028	1	cdh23
0.00393905	1.25419	0.046	0.025	1	wdr45
0.00394326	0.628469	0.092	0.062	1	timmdc1
0.00396327	1.90627	0.04	0.018	1	znf438
0.00402186	1.10242	0.052	0.028	1	lonp2
0.00404197	0.917502	0.058	0.032	1	si:dkey-117m1.4
0.00408798	2.68868	0.01	0.001	1	sox4a
0.0041203	4.48522	0.01	0	1	gig2e
0.0041203	4.41098	0.01	0	1	LOC100005864
0.0041203	4.71988	0.01	0	1	LOC100536646
0.0041203	4.36499	0.01	0	1	prkchb
0.0041203	5.1158	0.01	0	1	scn2b
0.0041203	4.89666	0.01	0	1	LOC100537147
0.00412172	0.757646	0.094	0.064	1	cul4b
0.00414164	3.27452	0.014	0.002	1	myo7aa
0.00418314	1.14372	0.043	0.021	1	tspan37
0.00420475	1.25973	0.033	0.016	1	anks1b
0.00427989	0.617017	0.049	0.028	1	arl5c
0.00434494	1.23212	0.037	0.017	1	si:dkey-94e7.1
0.00435819	0.971338	0.042	0.021	1	cnih2
0.00436649	0.659074	0.131	0.099	1	commd7
0.00438086	1.1705	0.035	0.016	1	acvr2ab
0.00441745	1.18723	0.04	0.018	1	BX324123.2
0.00443645	1.48557	0.022	0.007	1	abtb1
0.00444832	0.392962	0.223	0.179	1	bcas3
0.00445062	1.42721	0.017	0.007	1	map1ab
0.00445542	0.995538	0.087	0.058	1	mmd2a
0.00445659	0.596498	0.188	0.148	1	gmip
0.00449546	0.607618	0.17	0.132	1	bcl2a
0.00457435	0.685903	0.085	0.055	1	pdk2b
0.00464614	0.98045	0.06	0.034	1	rasa3
0.00465585	0.567446	0.136	0.101	1	sdcbp
0.00465882	0.352211	0.524	0.501	1	prkcda
0.0046713	4.80947	0.012	0	1	si:dkey-93m18.6
0.00467341	2.01555	0.017	0.004	1	ubox5
0.00467427	3.8979	0.012	0.001	1	LOC101885465
0.00467491	1.61554	0.027	0.01	1	mybl1
0.00468319	3.72386	0.012	0.001	1	LOC101883807
0.0047179	0.461558	0.212	0.167	1	rnf144b
0.00471953	1.41223	0.041	0.021	1	rereb
0.00474908	2.59592	0.012	0.001	1	CT583708.1
0.0047708	0.483403	0.213	0.171	1	zgc:154055
0.0047729	1.20575	0.049	0.027	1	pias1a
0.00477486	1.50749	0.031	0.014	1	zgc:101663
0.00477573	5.4875	0.01	0	1	LOC103909107
0.00484916	0.390575	0.293	0.249	1	ncoa4
0.00486433	2.25787	0.015	0.002	1	LOC110439377
0.00487277	2.07368	0.013	0.002	1	znf1024
0.00503884	1.05857	0.018	0.005	1	stox2a
0.00507561	0.461192	0.341	0.3	1	cybb
0.00509374	0.803388	0.057	0.032	1	mepce
0.00514121	1.47417	0.036	0.017	1	frem3
0.00516065	3.20107	0.017	0.004	1	lix1l
0.00523344	1.00605	0.045	0.023	1	zgc:109986
0.00525831	2.82475	0.017	0.004	1	fbxo25
0.00530868	0.859128	0.063	0.038	1	zgc:171711
0.00539908	1.32124	0.071	0.047	1	tfap4
0.00544223	1.50854	0.03	0.012	1	si:ch73-233k15.2
0.00550152	1.20236	0.037	0.017	1	btbd3a
0.00550595	3.19085	0.014	0.002	1	prkn
0.00551067	1.02914	0.055	0.032	1	stk11ip
0.00551467	2.45785	0.012	0.001	1	asmt
0.00552167	2.27616	0.012	0.001	1	LO018168.1
0.00553328	0.534952	0.153	0.119	1	tefb
0.0055565	0.559892	0.129	0.095	1	ep300b
0.00556336	2.38009	0.013	0.002	1	fcho1
0.00559073	0.744254	0.08	0.052	1	sccpdhb
0.00559625	1.87802	0.028	0.012	1	notch1a
0.00561944	1.34365	0.031	0.014	1	enpp5
0.00563751	2.07822	0.014	0.002	1	dnah11
0.00572855	1.66009	0.039	0.018	1	si:ch211-117k10.3
0.00575483	0.230747	0.631	0.624	1	LOC103909115
0.00575492	1.18692	0.03	0.014	1	pdgfrb
0.00586031	0.607268	0.176	0.14	1	fam172a
0.00587625	1.22559	0.075	0.048	1	itga4
0.00604632	0.982067	0.098	0.07	1	CABZ01061591.1
0.00604661	0.725353	0.088	0.062	1	brms1la
0.00612855	1.99382	0.016	0.004	1	sema3e
0.00619832	0.662613	0.051	0.03	1	tcf7l1a
0.00623847	0.841754	0.14	0.107	1	tor4aa
0.00630257	1.04872	0.038	0.018	1	tdh2
0.00643904	1.1822	0.026	0.011	1	smoc1
0.00644827	0.689497	0.125	0.091	1	pip5k1bb
0.00652862	1.63608	0.029	0.012	1	LOC101884549
0.00655297	1.10986	0.075	0.047	1	ccdc6b
0.00660998	1.56944	0.029	0.011	1	ube2r2
0.00688505	1.5429	0.04	0.021	1	nuggc.2
0.00689846	0.559278	0.154	0.119	1	LOC101885065
0.00690788	0.47493	0.201	0.161	1	pstpip1a
0.0071034	1.89535	0.015	0.004	1	gchfr
0.00716132	1.401	0.024	0.009	1	LO018490.1
0.00720551	0.549313	0.246	0.204	1	ccm2
0.00724423	1.37378	0.042	0.022	1	zfpl1
0.00724557	2.01772	0.02	0.006	1	LOC101885938
0.00725625	0.852094	0.067	0.042	1	tpd52l2a
0.00727499	0.846339	0.044	0.023	1	CABZ01054965.1
0.00728424	0.728454	0.107	0.075	1	si:ch211-226m16.2
0.00728716	3.19448	0.011	0.001	1	cdkn2c
0.00730676	1.49308	0.021	0.007	1	thap11
0.00732309	1.37294	0.021	0.007	1	si:dkey-178e17.1
0.00734538	0.588124	0.203	0.165	1	mgat5
0.00738199	0.597423	0.188	0.153	1	cyth1b
0.0074033	1.74339	0.011	0.001	1	CABZ01070258.1
0.007475	1.41054	0.028	0.012	1	si:ch73-109i22.2
0.00747779	2.10321	0.013	0.002	1	si:ch211-212k18.15
0.007594	0.953497	0.013	0.002	1	LOC108183672
0.00760125	1.43326	0.024	0.01	1	zgc:153631
0.00763194	0.75468	0.04	0.021	1	zgc:112023
0.00768562	0.989955	0.052	0.031	1	phf21ab
0.00774319	0.81443	0.093	0.065	1	itpr2
0.00775824	0.689321	0.029	0.014	1	pdpk1a
0.00780008	1.28974	0.025	0.01	1	hmox2a
0.00783677	1.23515	0.03	0.014	1	cenpe
0.00788142	2.32891	0.029	0.012	1	LOC110440068
0.00792304	0.425172	0.315	0.272	1	sptlc2a
0.00794022	0.91874	0.047	0.026	1	si:ch211-284e13.9
0.00799238	2.21887	0.015	0.004	1	setdb2
0.0079966	2.34688	0.015	0.004	1	si:dkey-261m9.9
0.00799687	1.30559	0.023	0.009	1	insig1
0.00801288	0.938436	0.051	0.031	1	cks2
0.00813793	0.696955	0.118	0.087	1	zgc:194981
0.00814388	0.73694	0.089	0.059	1	ppp2r5cb
0.00816054	0.612506	0.197	0.161	1	mast2
0.00824962	1.07677	0.041	0.022	1	zgc:173607
0.00825119	2.14887	0.019	0.006	1	znf362b
0.0082637	0.812945	0.056	0.033	1	zgc:56235
0.00831536	1.07846	0.055	0.03	1	rho
0.00834361	0.675434	0.183	0.149	1	ehmt1b
0.00838277	1.4322	0.028	0.009	1	ifi45
0.00840392	3.8423	0.011	0.001	1	si:ch211-209l18.2
0.00841977	1.66854	0.018	0.005	1	FO744833.2
0.00846256	3.00805	0.011	0.001	1	fgfr1a
0.00849598	2.70102	0.013	0.002	1	slc25a17
0.00851848	0.403842	0.304	0.265	1	thrap3b
0.00852024	2.50405	0.013	0.002	1	si:dkey-58f10.11
0.00853698	0.3458	0.358	0.329	1	dhrs9
0.00855919	2.29955	0.013	0.002	1	LOC103908936
0.00871209	0.43758	0.372	0.335	1	tomm7
0.00892725	0.352668	0.348	0.308	1	si:ch211-214j24.10
0.00905526	0.976483	0.052	0.031	1	si:ch211-234h8.7
0.00908343	2.95779	0.015	0.002	1	prss12
0.00924135	1.03884	0.031	0.015	1	tchp
0.00935392	0.446897	0.161	0.124	1	si:cabz01007802.1
0.00942863	1.57629	0.021	0.006	1	arid5a
0.00943659	1.69174	0.025	0.01	1	hdlbpb
0.00945395	2.42844	0.017	0.005	1	FO704622.1
0.00948559	1.93379	0.019	0.006	1	shisa4
0.00954289	1.79721	0.018	0.006	1	FAM53C
0.00961287	1.69953	0.017	0.005	1	pou6f1
0.00968167	3.44442	0.013	0.002	1	msrb1a
0.00968714	0.963416	0.037	0.018	1	map3k1
0.00969321	0.589386	0.175	0.14	1	si:rp71-1g18.13
0.00970863	0.492537	0.198	0.16	1	march7
0.00973133	4.79706	0.011	0	1	phactr4b
0.0100019	0.711627	0.064	0.039	1	eaf1
0.0100301	0.325377	0.354	0.318	1	pde4ba
0.0100914	1.73398	0.023	0.009	1	ANKFN1
0.0100943	0.797798	0.067	0.043	1	prkab1a
0.0101669	0.527512	0.085	0.059	1	pnkd
0.0102601	1.71471	0.028	0.012	1	dagla
0.0103182	1.71227	0.028	0.011	1	cramp1
0.0103335	0.912673	0.045	0.026	1	glceb
0.0104839	1.08179	0.058	0.037	1	ppp1r14bb
0.0104857	3.26433	0.017	0.004	1	hist1h4l.3
0.0106427	0.747167	0.053	0.033	1	tecrb
0.0106554	1.02052	0.032	0.017	1	smyd3
0.0106568	0.780931	0.073	0.049	1	ZNF512B
0.0106857	1.88668	0.014	0.004	1	lama5
0.0107073	0.640913	0.203	0.172	1	gstm.1
0.010735	0.635782	0.051	0.031	1	LOC100002283
0.0107857	0.809327	0.067	0.043	1	diablob
0.0107902	1.99417	0.018	0.006	1	klf11b
0.010814	0.607637	0.104	0.076	1	paqr7a
0.0108412	1.25423	0.021	0.007	1	CR933559.1
0.0108892	0.484624	0.208	0.172	1	arglu1b
0.0108937	1.23535	0.014	0.004	1	si:ch211-276a17.5
0.0109109	1.1378	0.061	0.037	1	rangap1a
0.0110053	0.981357	0.059	0.037	1	ap5s1
0.0111216	0.620249	0.054	0.032	1	tp53i11a
0.0112524	3.10988	0.012	0.001	1	sptbn1
0.0112787	4.63902	0.01	0.001	1	rln3a
0.0113566	0.512229	0.16	0.128	1	irf2
0.0113928	2.01373	0.032	0.015	1	rapgef1b
0.0115625	0.565976	0.085	0.06	1	nsd3
0.0115849	1.25701	0.012	0.002	1	ATG14
0.0116152	1.62218	0.027	0.012	1	nuf2
0.0116442	1.16999	0.041	0.022	1	mcoln2
0.0116449	0.82784	0.078	0.052	1	fbrsl1
0.0118614	3.32038	0.015	0.004	1	si:ch211-199b20.3
0.0119148	1.74395	0.024	0.01	1	bub1
0.0119235	0.518598	0.156	0.126	1	jarid2b
0.0119278	0.594708	0.051	0.031	1	uba7
0.0119545	1.81545	0.02	0.007	1	CU570781.3
0.0120188	0.335452	0.324	0.289	1	f11r.1
0.0120994	0.609599	0.08	0.057	1	tesk2
0.0121037	0.724488	0.084	0.059	1	tom1l2a
0.0122011	0.610078	0.122	0.09	1	ssu72
0.0122854	0.616153	0.124	0.092	1	gramd4b
0.0123041	1.95646	0.018	0.005	1	tnfaip8l3
0.0125763	1.27268	0.033	0.017	1	ttc33
0.0125947	0.443755	0.124	0.094	1	zgc:92606
0.0126168	1.06208	0.039	0.021	1	mif4gdb
0.0126441	1.17355	0.023	0.01	1	zgc:165656
0.0126696	1.21296	0.06	0.039	1	kdm2bb
0.0127213	0.740528	0.124	0.095	1	spen
0.0127318	0.305734	0.427	0.397	1	hmha1a
0.012785	1.8185	0.027	0.012	1	CU855930.1
0.0128336	0.501498	0.207	0.171	1	fam133b
0.0128937	1.14773	0.049	0.03	1	tlk1b
0.013019	2.8475	0.012	0.002	1	b9d2
0.013019	2.55413	0.012	0.002	1	ptpn21
0.0130759	0.890922	0.051	0.032	1	cant1a
0.0130805	1.10896	0.025	0.011	1	nudt12
0.0131204	1.06371	0.072	0.047	1	pcxa
0.0131295	2.17633	0.012	0.002	1	LOC100150095
0.0131346	1.91119	0.032	0.015	1	usf1
0.0131814	2.15501	0.012	0.002	1	CU681836.2
0.0132585	2.59065	0.01	0.001	1	nr3c2
0.0132585	0.36155	0.381	0.351	1	parvg
0.0132609	1.00477	0.034	0.018	1	dennd5a
0.0133169	1.98332	0.01	0.001	1	LOC110438496
0.0133716	0.924188	0.107	0.079	1	tmbim1a
0.0134116	1.61985	0.029	0.014	1	mynn
0.013551	0.59449	0.091	0.065	1	dtnbp1a
0.0136289	0.852881	0.046	0.027	1	rnf213b
0.0137063	0.386147	0.186	0.153	1	zgc:162939
0.0137994	1.01689	0.043	0.025	1	CU929391.2
0.0138045	2.72713	0.013	0.002	1	gpr55a
0.0140088	0.407522	0.317	0.282	1	eif3i
0.0140446	1.67633	0.018	0.006	1	si:dkey-1b17.5
0.0141273	1.8074	0.025	0.01	1	hcst
0.0141612	1.09832	0.04	0.022	1	cds1
0.0141826	1.08016	0.033	0.015	1	gpcpd1
0.0141935	0.691155	0.123	0.094	1	cdc25b
0.0142228	0.839382	0.164	0.134	1	mrpl30
0.0144122	0.549304	0.075	0.052	1	sp4
0.0145386	0.703846	0.067	0.043	1	si:ch211-166g5.4
0.0145829	0.90097	0.073	0.05	1	fam3a
0.0145978	0.94457	0.033	0.017	1	asap2b
0.0146777	0.462383	0.152	0.123	1	prex1
0.0146864	0.875418	0.04	0.022	1	abca3b
0.015071	0.72468	0.062	0.039	1	zgc:77056
0.0151746	4.03559	0.01	0.001	1	dnajc16l
0.0152504	1.21383	0.033	0.018	1	zbtb33
0.015415	1.31704	0.052	0.033	1	anapc15
0.0156547	1.28636	0.023	0.01	1	cep55l
0.0156615	0.451521	0.184	0.149	1	zeb2a
0.0157513	0.681008	0.084	0.057	1	itpka
0.0157549	1.34802	0.019	0.007	1	BX323596.2
0.0157897	0.660501	0.154	0.124	1	dbnlb
0.0157992	2.93655	0.014	0.004	1	fggy
0.0159831	0.675233	0.168	0.142	1	ugp2b
0.01601	0.500795	0.192	0.159	1	laptm4a
0.0160356	0.786487	0.072	0.048	1	smim29
0.016048	1.46012	0.024	0.011	1	selenoo1
0.0162555	1.11877	0.076	0.049	1	LOC100151196
0.0163147	1.18916	0.048	0.03	1	zgc:56095
0.0163911	1.58851	0.015	0.005	1	cdip1
0.0164236	1.59327	0.021	0.009	1	c8g
0.0168864	0.712384	0.047	0.03	1	aamdc
0.016914	1.11621	0.047	0.027	1	pbxip1a
0.0169839	1.36853	0.033	0.016	1	si:ch211-266d19.4
0.0170109	0.600529	0.214	0.185	1	LOC101885706
0.0170216	0.965972	0.04	0.023	1	atg101
0.0170542	1.64483	0.022	0.01	1	igdcc4
0.0171243	0.882707	0.071	0.05	1	mars
0.0171976	2.96739	0.011	0.002	1	zgc:153521
0.0172562	0.62986	0.067	0.044	1	pla2g15
0.0172781	0.470578	0.186	0.149	1	tob1b
0.0173108	1.79195	0.019	0.007	1	zgc:172341
0.0173619	2.56176	0.01	0.001	1	kcnj13
0.0173845	1.35038	0.04	0.021	1	gemin2
0.0174495	1.79843	0.011	0.002	1	cacna1aa
0.017908	0.511386	0.203	0.17	1	prkcaa
0.0179094	0.674849	0.057	0.036	1	foxk1
0.0179803	0.772966	0.11	0.084	1	irs1
0.0180014	1.97992	0.017	0.006	1	znf281a
0.0181749	2.54079	0.016	0.005	1	cdk19
0.0182008	2.41941	0.016	0.005	1	melk
0.018313	2.25546	0.013	0.004	1	BX511080.1
0.0184826	1.35964	0.018	0.006	1	si:ch211-209n20.3
0.0185062	1.65895	0.015	0.005	1	BX323596.1
0.0185238	1.79662	0.015	0.005	1	soul5
0.0188571	0.966664	0.016	0.006	1	mettl15
0.0188634	1.34153	0.021	0.009	1	shroom4
0.0189044	1.9893	0.022	0.01	1	si:dkey-108k21.21
0.0189304	2.74109	0.018	0.007	1	purg
0.0190836	2.44097	0.018	0.007	1	si:dkeyp-113d7.1
0.0192063	0.499843	0.122	0.094	1	zyg11
0.019257	0.289465	0.436	0.411	1	ncf2
0.0192732	0.50162	0.267	0.238	1	eif4ebp1
0.0193358	2.13279	0.019	0.007	1	pip4p1b
0.0195518	1.16803	0.064	0.043	1	DHDH
0.0195666	0.95028	0.048	0.032	1	tiam2a
0.0200424	0.998666	0.025	0.015	1	foxp4
0.0200456	0.670643	0.092	0.06	1	hbaa2
0.0201858	2.00628	0.011	0.002	1	CR848667.1
0.0202965	1.51011	0.026	0.011	1	chp2
0.0203675	0.775889	0.021	0.01	1	bcl6aa
0.020496	0.406632	0.355	0.335	1	FP015862.2
0.0205482	0.423338	0.296	0.265	1	dok2
0.0206657	0.96488	0.055	0.036	1	pttg1ipa
0.0207152	3.36395	0.013	0.002	1	kaznb
0.0207175	1.76037	0.017	0.006	1	ulk1b
0.0207954	0.631735	0.036	0.02	1	CU694532.1
0.0208472	2.50848	0.012	0.004	1	meis1b
0.0211254	1.20037	0.017	0.006	1	zmp:0000001228
0.0211456	1.70016	0.013	0.004	1	tmem240b
0.0212101	1.87433	0.012	0.004	1	ppp1r9bb
0.0212208	1.81343	0.013	0.004	1	si:dkey-52l18.4
0.0212208	1.41806	0.013	0.004	1	ccl38.1
0.0212493	1.63024	0.015	0.005	1	cyb5r2
0.0212793	0.288511	0.428	0.405	1	sh3bgrl3
0.0215036	0.400304	0.324	0.296	1	jpt2
0.0215158	0.623355	0.151	0.124	1	snx17
0.0217698	0.766303	0.053	0.034	1	nfybb
0.0218245	0.62977	0.1	0.076	1	selenoh
0.021898	0.995842	0.033	0.018	1	npl
0.0221068	0.330015	0.217	0.177	1	rab11fip4b
0.0221527	0.678219	0.069	0.048	1	tapbp.1
0.022153	0.470754	0.273	0.245	1	ipo7
0.0222921	1.70471	0.024	0.009	1	si:dkey-14o6.2
0.022449	0.948292	0.048	0.031	1	znf451
0.0224981	1.52171	0.019	0.006	1	ppcdc
0.0225938	0.925423	0.074	0.053	1	cat
0.022668	1.33515	0.018	0.007	1	vps11
0.0228009	1.27245	0.018	0.007	1	fscn1b
0.0228146	0.504007	0.103	0.078	1	si:ch211-106e7.2
0.0229378	0.850153	0.074	0.049	1	eif2b2
0.0229782	0.79394	0.061	0.042	1	serinc1
0.023057	0.448196	0.881	0.877	1	hmgn2
0.0230634	0.717211	0.071	0.05	1	pank2
0.0230737	2.03095	0.02	0.009	1	nsmaf
0.0231209	2.43437	0.01	0.002	1	tlr3
0.0231363	0.70158	0.045	0.028	1	si:dkey-21o19.2
0.0232328	0.842783	0.017	0.007	1	pfkfb3
0.023262	2.04202	0.011	0.002	1	nrde2
0.0232677	1.96297	0.019	0.006	1	inpp4b
0.0233007	1.92077	0.011	0.002	1	wdfy2
0.0233729	0.358794	0.513	0.512	1	arpc4l
0.023408	0.994276	0.081	0.06	1	nipsnap3a
0.0234132	1.78861	0.017	0.006	1	nek2
0.0235689	1.04091	0.032	0.018	1	sts
0.0237649	0.266363	0.028	0.015	1	atg10
0.0238108	1.47751	0.02	0.009	1	olah
0.0238297	1.39412	0.02	0.009	1	rcbtb1
0.0239911	1.37747	0.02	0.009	1	spsb3a
0.023996	2.32944	0.013	0.004	1	si:dkey-147f3.4
0.0240721	1.87531	0.015	0.005	1	paox1
0.0241284	0.621665	0.084	0.062	1	prkacba
0.0243746	0.961533	0.051	0.031	1	ly75
0.0244447	1.11393	0.065	0.043	1	kdm2ba
0.0245379	1.19568	0.015	0.005	1	si:ch73-223f5.1
0.0246034	2.14713	0.018	0.007	1	proser3
0.0247482	0.74431	0.089	0.067	1	ska2
0.0254457	0.707038	0.021	0.01	1	si:dkey-42i9.7
0.0255248	1.21882	0.033	0.018	1	kcnip3b
0.0255786	0.531636	0.209	0.182	1	ip6k2a
0.0256131	1.48212	0.026	0.014	1	LOC100007492
0.0259082	0.658076	0.115	0.09	1	rab11bb
0.0260044	1.51565	0.029	0.016	1	rfx1a
0.0260259	1.36356	0.027	0.014	1	si:ch211-212c13.10
0.0262063	0.996148	0.063	0.043	1	yy1b
0.0263901	0.345758	0.322	0.293	1	ar
0.0265241	1.16347	0.037	0.022	1	gnl1
0.0267989	0.293405	0.389	0.36	1	zgc:91976
0.0268599	0.701272	0.079	0.053	1	nedd4a
0.0269168	2.02917	0.022	0.01	1	si:dkey-71l4.4
0.0269425	1.62415	0.01	0.002	1	si:ch211-222e20.4
0.0269573	1.73644	0.011	0.002	1	rccd1
0.0271353	0.914801	0.047	0.031	1	dhrs7
0.0271644	0.942326	0.016	0.006	1	plxnb2b
0.0272682	1.06666	0.037	0.022	1	lrrc8db
0.027357	1.71105	0.022	0.01	1	msmo1
0.0274117	0.865376	0.038	0.021	1	CABZ01066694.1
0.0274305	1.06915	0.02	0.009	1	si:ch211-79k12.2
0.0274677	1.79906	0.015	0.005	1	LOC101882843
0.0275547	1.00487	0.061	0.041	1	nck2b
0.0277012	0.851956	0.055	0.037	1	tnksa
0.0277056	0.712949	0.068	0.047	1	mdm2
0.0277186	2.19198	0.011	0.002	1	agap3
0.027763	0.408373	0.186	0.151	1	ankrd12
0.0279387	0.534652	0.154	0.127	1	osbpl1a
0.0279484	1.7494	0.012	0.004	1	cep295
0.0280869	0.922353	0.07	0.05	1	BX664618.1
0.0281728	1.31849	0.013	0.004	1	LOC101883948
0.028456	0.810295	0.086	0.065	1	LOC101883913
0.02858	0.663926	0.057	0.039	1	casp3a
0.0286769	1.48461	0.018	0.007	1	mtmr10
0.0286804	1.4834	0.025	0.011	1	bach2a
0.0288264	0.887039	0.034	0.02	1	hs1bp3
0.0289522	1.08071	0.046	0.028	1	samd11
0.0290217	0.539194	0.206	0.179	1	bcl2l1
0.0290743	1.25994	0.017	0.007	1	si:ch211-137j23.8
0.029487	1.01605	0.043	0.027	1	rprd2b
0.0295812	0.665961	0.112	0.087	1	dnpep
0.0296256	0.739919	0.069	0.048	1	akip1
0.029708	1.73785	0.019	0.009	1	ptpdc1a
0.0298209	2.19185	0.016	0.006	1	wrap53
0.0301753	0.31272	0.122	0.096	1	slc44a2
0.0301912	0.515916	0.096	0.071	1	crebbpa
0.0302412	0.680295	0.049	0.03	1	ankrd13a
0.0302877	1.27178	0.019	0.009	1	fbxo7
0.0302974	0.893643	0.064	0.046	1	mgst1.2
0.0304452	0.447984	0.083	0.062	1	pqlc3
0.0304924	0.856255	0.031	0.017	1	dglucy
0.030567	0.419866	0.13	0.102	1	dctn3
0.0305925	1.47433	0.016	0.005	1	slc35f6
0.0306899	0.672831	0.034	0.018	1	hps4
0.0308492	0.982641	0.055	0.037	1	cables1
0.0308545	1.20733	0.037	0.022	1	si:ch211-230g15.5
0.0309343	2.09269	0.01	0.002	1	lpar3
0.0310203	1.44429	0.051	0.033	1	caska
0.0310327	0.523035	0.088	0.065	1	grk5l
0.0310667	0.980384	0.041	0.027	1	pdcd4b
0.0311345	1.06863	0.04	0.022	1	cmtm3
0.031136	0.359752	0.176	0.145	1	ap2b1
0.0311375	0.565619	0.115	0.09	1	nedd9
0.0312599	2.00788	0.014	0.005	1	si:ch211-113a14.24
0.031335	0.794473	0.064	0.043	1	ripk2
0.0316145	1.57068	0.014	0.005	1	CU468896.1
0.0318483	1.38438	0.053	0.037	1	zeb1b
0.0318932	0.611286	0.075	0.054	1	hdac11
0.0320046	1.00197	0.043	0.025	1	znf143b
0.0320755	1.05499	0.013	0.005	1	GARNL3
0.0321053	1.48999	0.012	0.004	1	taok1b
0.0322415	0.90377	0.071	0.052	1	si:dkeyp-87d8.8
0.0323374	0.840163	0.04	0.023	1	ubxn6
0.0323432	1.47511	0.017	0.006	1	si:dkey-69o16.5
0.0324765	0.593621	0.102	0.08	1	si:ch211-239f4.1
0.0325235	0.559998	0.119	0.092	1	sgpp1
0.0325535	0.951885	0.039	0.023	1	tspan17
0.0326476	1.32662	0.018	0.007	1	rybpa
0.0327226	1.25287	0.024	0.012	1	smarcb1b
0.0327489	1.25806	0.023	0.012	1	foxo3b
0.0330895	0.491544	0.122	0.097	1	stau2
0.033155	1.3085	0.034	0.02	1	TBC1D8B
0.0331808	0.869869	0.03	0.017	1	fam129ab
0.0331909	1.54577	0.03	0.018	1	pabpc1b
0.0332312	1.04293	0.026	0.014	1	LOC110438330
0.033478	0.548812	0.164	0.139	1	med11
0.0335636	1.73699	0.018	0.007	1	RALGDS
0.0336081	1.28106	0.032	0.016	1	sox4b
0.034016	1.85626	0.015	0.006	1	zgc:162872
0.0341262	1.14054	0.019	0.009	1	NHLRC3
0.0341889	0.3302	0.203	0.171	1	xiap
0.0344562	1.04801	0.032	0.018	1	prcc
0.0346218	0.707273	0.093	0.07	1	fam102ba
0.0348095	1.82559	0.024	0.011	1	lrrc28
0.0349297	0.608002	0.065	0.047	1	irs2a
0.0350685	0.699478	0.047	0.031	1	mgmt
0.035185	3.34612	0.01	0.001	1	CABZ01060492.1
0.0352727	0.623533	0.042	0.027	1	zc3h12b
0.0353479	1.33033	0.029	0.015	1	cacng3b
0.0354416	0.931904	0.042	0.026	1	sfxn2
0.0354835	2.01072	0.01	0.002	1	rad51c
0.0356042	1.37234	0.023	0.012	1	si:dkey-73n10.1
0.0356621	1.83417	0.014	0.005	1	BX511123.2
0.0358148	0.545163	0.067	0.047	1	rab18a
0.0358281	0.829123	0.055	0.038	1	itgam
0.0358913	1.75422	0.01	0.002	1	nme4
0.0359205	1.33468	0.028	0.015	1	CT027815.1
0.0359522	1.27467	0.024	0.011	1	CR376857.1
0.0363826	0.448915	0.189	0.164	1	arrb2a
0.0363966	1.04466	0.024	0.014	1	prdm11
0.0364516	0.589468	0.085	0.063	1	GGT7
0.0367971	0.448503	0.292	0.262	1	osgn1
0.0368001	1.6039	0.012	0.004	1	cavin1a
0.0369754	2.20588	0.018	0.009	1	znf507
0.0369857	1.02627	0.028	0.015	1	fam207a
0.0373295	0.693093	0.127	0.105	1	lamtor1
0.037384	0.729045	0.011	0.004	1	igsf21a
0.0374201	0.653162	0.076	0.054	1	mapk8b
0.0375007	0.789715	0.062	0.041	1	vdrb
0.0377743	0.366428	0.287	0.257	1	hmha1b
0.0378005	2.26576	0.015	0.006	1	ulk4
0.0380594	2.17878	0.016	0.005	1	plppr5b
0.0383204	0.515252	0.086	0.065	1	ddx47
0.0385231	1.36847	0.019	0.007	1	cenpk
0.0385941	0.691682	0.125	0.099	1	tcea3
0.0386861	0.893813	0.074	0.055	1	SIPA1
0.0387822	1.7864	0.023	0.011	1	rnf144aa
0.0389738	0.620728	0.093	0.073	1	skila
0.0391102	1.45522	0.016	0.006	1	BX950187.1
0.0391254	1.67668	0.023	0.012	1	LOC103909811
0.0394436	1.44496	0.015	0.006	1	zgc:113295
0.0394844	1.41631	0.024	0.012	1	si:ch211-242b18.1
0.0395542	0.726765	0.047	0.031	1	eepd1
0.0395982	1.51637	0.024	0.012	1	tmem60
0.0398087	0.660845	0.053	0.034	1	si:dkey-46g23.1
0.0401097	0.755267	0.041	0.027	1	ifit11
0.0402886	0.807734	0.051	0.032	1	polr3glb
0.0404403	1.11132	0.022	0.011	1	mak
0.0405677	1.15141	0.022	0.011	1	sugct
0.0405761	0.383804	0.114	0.089	1	naga
0.0406888	0.460635	0.092	0.068	1	apba1a
0.0410201	1.5632	0.013	0.005	1	cmtr2
0.0410439	0.679624	0.041	0.025	1	ttpal
0.0410757	1.69767	0.013	0.005	1	zgc:173575
0.0410842	2.09556	0.01	0.001	1	si:rp71-1h20.5
0.0411333	2.1603	0.012	0.004	1	ankrd33ba
0.0411419	0.608662	0.082	0.06	1	si:dkey-220k22.1
0.0411539	0.85221	0.073	0.053	1	pcnt
0.0411627	0.77847	0.09	0.069	1	exosc1
0.0412846	1.53616	0.01	0.002	1	si:dkeyp-104b3.1
0.0413651	0.345747	0.396	0.385	1	ola1
0.0414423	1.50275	0.016	0.007	1	LOC561361
0.0415829	0.452562	0.074	0.053	1	stimate
0.0418649	1.81849	0.011	0.004	1	entpd8
0.0418842	0.451492	0.132	0.106	1	mpped2
0.0419843	0.984978	0.038	0.023	1	ankib1a
0.0419895	0.932342	0.061	0.044	1	zgc:110425
0.0420566	0.762731	0.058	0.039	1	BX294434.1
0.0421112	1.34522	0.012	0.004	1	fyco1a
0.0421338	1.28633	0.03	0.017	1	sh3glb2a
0.042173	1.48827	0.01	0.004	1	BX465862.1
0.042183	0.700579	0.026	0.014	1	BX548015.2
0.0425299	0.233879	0.452	0.422	1	kcnq5b
0.0427133	0.864934	0.032	0.018	1	nudt15
0.0428216	0.998592	0.077	0.057	1	znrf3
0.0429335	1.4682	0.015	0.005	1	pdia2
0.0431166	0.514102	0.127	0.101	1	ivns1abpb
0.0432552	0.380276	0.253	0.228	1	pdhb
0.0433137	0.641495	0.027	0.015	1	si:dkey-68o6.6
0.0433499	0.589044	0.098	0.073	1	ngdn
0.0434739	1.5982	0.02	0.01	1	ccnb3
0.043891	1.19151	0.027	0.015	1	zgc:110329
0.044076	1.0044	0.049	0.032	1	kptn
0.0440977	1.24485	0.026	0.012	1	pik3ap1
0.0443866	0.925398	0.056	0.037	1	papolg
0.0443986	0.268935	0.51	0.502	1	baz2ba
0.0445474	1.38843	0.025	0.014	1	zgc:92664
0.0448791	1.13374	0.025	0.014	1	atg4c
0.0449055	0.769687	0.11	0.086	1	si:dkey-106l3.7
0.0456251	0.672232	0.066	0.047	1	tbc1d10aa
0.0457192	2.38414	0.013	0.005	1	pomt1
0.0457241	0.916363	0.027	0.015	1	wu:fe05a04
0.0458849	0.899288	0.023	0.012	1	afg1lb
0.0459215	1.64379	0.016	0.007	1	nuggc.1
0.0460204	0.956232	0.037	0.022	1	ftr67
0.0460527	1.26469	0.044	0.028	1	wipi2
0.0461038	1.52406	0.017	0.007	1	tirap
0.0462043	1.88259	0.013	0.004	1	egfl6
0.0464702	1.65232	0.017	0.007	1	setx
0.0464931	0.726376	0.04	0.026	1	tmem230b
0.0466497	1.28486	0.029	0.017	1	sapcd2
0.0468335	0.74343	0.038	0.025	1	tbpl1
0.046971	1.65827	0.026	0.014	1	ndst3
0.0470412	0.714934	0.024	0.012	1	plekhm1
0.0472719	1.53402	0.026	0.015	1	mafga
0.0475817	0.390196	0.194	0.165	1	btk
0.0477609	1.89848	0.011	0.004	1	znf800a
0.0478662	0.96495	0.016	0.007	1	CU681842.1
0.0483046	0.289138	0.357	0.331	1	fam49ba
0.048484	1.05938	0.011	0.004	1	znf652
0.0486375	0.882899	0.045	0.031	1	irf1b
0.0487428	1.05709	0.011	0.004	1	hdac5
0.0488608	0.912304	0.011	0.004	1	iffo1b
0.048912	0.837366	0.033	0.02	1	runx1t1
0.0490697	1.51489	0.02	0.01	1	trim35-7
0.0493798	1.31351	0.023	0.012	1	hmmr
0.0494754	0.535822	0.143	0.118	1	sept12

## Sheet: DE tumor vs wt mature
p_val	avg_log2FC	pct.1	pct.2	p_val_adj	genes
2.49105e-113	0.876953	0.984	0.995	8.56524e-109	pfn1
1.03603e-111	3.87606	0.615	0.078	3.5623e-107	mhc1uba
1.34901e-105	1.0894	1	1	4.63845e-101	mpx
9.79438e-81	1.14914	0.981	0.961	3.3677e-76	npsn
9.6177e-73	2.00612	0.942	0.85	3.30695e-68	lyz
5.54545e-67	0.488213	1	1	1.90675e-62	actb2
6.78588e-63	3.1169	0.457	0.081	2.33326e-58	si:ch211-286b5.8
2.59297e-44	1.74439	0.55	0.27	8.91568e-40	si:dkey-24p1.7
3.72225e-44	2.43389	0.448	0.155	1.27986e-39	si:ch1073-429i10.1
3.33392e-43	3.33168	0.441	0.166	1.14634e-38	CR318588.1
1.06208e-38	3.68468	0.305	0.044	3.65185e-34	nlgn1
3.38395e-38	1.32833	0.631	0.407	1.16354e-33	HACD4
2.33269e-34	2.40165	0.341	0.085	8.02071e-30	wu:fb05h10
9.17487e-34	1.22256	0.637	0.473	3.15469e-29	wasb
4.30424e-33	2.26829	0.431	0.199	1.47997e-28	cpa5
3.14253e-32	2.15279	0.442	0.217	1.08053e-27	dusp19b
6.16684e-29	1.9969	0.363	0.136	2.12041e-24	plbd1
9.68264e-29	2.45646	0.312	0.093	3.32928e-24	pde7a
1.70517e-28	1.91114	0.376	0.148	5.86305e-24	mrtfab
1.63139e-27	1.76992	0.385	0.157	5.60938e-23	BX296551.1
8.29213e-27	1.32752	0.558	0.354	2.85117e-22	si:ch211-132p1.3
2.29144e-26	1.16438	0.959	0.954	7.87887e-22	hbba1
4.91257e-26	1.64836	0.41	0.206	1.68914e-21	gapdh
3.16356e-25	1.02047	0.655	0.481	1.08776e-20	pim1
1.47435e-22	0.771253	0.678	0.54	5.06941e-18	cebpa
1.71984e-22	3.70768	0.186	0.025	5.91349e-18	zgc:152791
2.46967e-22	1.46471	0.401	0.206	8.49171e-18	hcls1
2.0172e-21	1.44137	0.411	0.229	6.93595e-17	CABZ01111959.1
2.22841e-21	3.02833	0.242	0.069	7.66217e-17	BX908782.3
2.52173e-21	2.07645	0.278	0.099	8.67071e-17	ctss1
5.54809e-21	1.7039	0.346	0.164	1.90766e-16	itgae.2
6.07775e-21	0.430234	1	1	2.08977e-16	lect2l
1.99688e-20	2.47382	0.207	0.046	6.86607e-16	tnrc6c1
2.65099e-20	1.76219	0.303	0.12	9.11518e-16	hsd3b7
3.07705e-20	2.83539	0.199	0.041	1.05801e-15	wu:fj29h11
2.39041e-19	1.18684	0.927	0.914	8.21918e-15	hbaa1
1.15154e-18	1.91717	0.258	0.095	3.95947e-14	itgb3a
1.84139e-18	0.845719	0.616	0.511	6.33143e-14	il16
4.50113e-18	1.61938	0.317	0.152	1.54767e-13	hdac9b
2.41667e-17	1.2016	0.456	0.303	8.30949e-13	itpkcb
5.19357e-17	0.570763	0.802	0.776	1.78576e-12	mbnl1
5.31287e-17	0.563341	0.809	0.785	1.82678e-12	mcl1a
8.04558e-17	0.771683	0.595	0.473	2.76639e-12	fam107b
1.12467e-16	2.1414	0.231	0.085	3.86706e-12	cnksr2b
2.29824e-16	1.74144	0.25	0.099	7.90228e-12	spice1
2.78758e-16	4.71345	0.117	0.005	9.58482e-12	CT573337.1
3.02895e-16	1.33161	0.373	0.219	1.04147e-11	si:dkey-222f2.7
3.22522e-16	0.832227	0.564	0.441	1.10896e-11	lxn
3.31165e-16	0.436509	0.901	0.938	1.13868e-11	rps13
3.46305e-16	1.12121	0.439	0.295	1.19073e-11	sh3bgrl
3.74054e-16	1.98464	0.34	0.192	1.28615e-11	h1fx
5.67655e-16	0.881292	0.57	0.453	1.95182e-11	gpx1a
5.78469e-16	0.964704	0.464	0.325	1.98901e-11	dub
9.44144e-16	6.60597	0.106	0.002	3.24635e-11	zgc:153759
1.65164e-15	2.36002	0.174	0.044	5.67901e-11	usp36
2.16164e-15	4.44666	0.114	0.007	7.4326e-11	wu:fc75a09
2.58139e-15	3.04722	0.144	0.025	8.87586e-11	ehbp1l1a
3.66367e-15	1.60725	0.283	0.134	1.25971e-10	atp1a3a
4.32086e-15	1.03875	0.487	0.377	1.48569e-10	sms
2.31251e-14	1.09712	0.412	0.259	7.95133e-10	CR848841.1
2.38268e-14	1.65047	0.234	0.092	8.19259e-10	ccnd2a
2.87709e-14	0.766644	0.6	0.492	9.8926e-10	alox5a
3.12404e-14	1.5571	0.27	0.131	1.07417e-09	stat2
3.86915e-14	0.871868	0.551	0.45	1.33037e-09	hbegfa
4.05277e-14	0.703296	0.659	0.601	1.39351e-09	cfl1l
4.26804e-14	1.13186	0.36	0.213	1.46752e-09	RASSF5
1.40951e-13	5.99256	0.091	0.002	4.84647e-09	LOC100537384
1.65438e-13	1.34616	0.563	0.469	5.6884e-09	si:ch211-5k11.8
1.96156e-13	0.515655	0.775	0.757	6.74462e-09	arpc1b
2.00968e-13	4.84782	0.094	0.004	6.91009e-09	plin2
2.45828e-13	2.89164	0.126	0.023	8.45254e-09	CR318588.3
3.29512e-13	0.449082	0.812	0.829	1.13299e-08	ppiaa
3.69108e-13	1.42884	0.277	0.143	1.26914e-08	hyal3
4.22624e-13	0.370349	0.895	0.926	1.45315e-08	rps25
4.39522e-13	1.94277	0.184	0.06	1.51125e-08	ndrg3b
4.4516e-13	3.11592	0.117	0.018	1.53064e-08	gig2d
6.19411e-13	8.50653	0.084	0	2.12978e-08	kcnh5a
6.49755e-13	3.62273	0.105	0.009	2.23412e-08	erc2.1
7.15651e-13	3.79862	0.102	0.011	2.46069e-08	fthl31
7.8317e-13	2.2109	0.154	0.042	2.69285e-08	gadd45ab
1.20932e-12	0.474999	0.751	0.677	4.15811e-08	b2m
1.98992e-12	1.79785	0.214	0.093	6.84214e-08	BX004996.1
2.82059e-12	3.89928	0.091	0.005	9.6983e-08	FO904898.3
6.98041e-12	1.24893	0.278	0.157	2.40014e-07	zgc:153317
7.08154e-12	1.78254	0.197	0.081	2.43492e-07	cbx7a
7.88083e-12	3.12655	0.113	0.021	2.70974e-07	ptpn18
8.16326e-12	1.20734	0.321	0.198	2.80686e-07	tpm1
1.20876e-11	3.74476	0.093	0.009	4.15621e-07	gabrr3a
1.4237e-11	2.61691	0.128	0.032	4.89526e-07	LOC108179161
2.02002e-11	3.82902	0.085	0.005	6.94564e-07	zgc:171497
2.48664e-11	1.83055	0.194	0.083	8.55006e-07	tmem176l.3a
3.02828e-11	1.81534	0.174	0.067	1.04124e-06	CABZ01074307.1
3.86492e-11	2.22946	0.146	0.048	1.32891e-06	def6a
4.08845e-11	1.08044	0.34	0.215	1.40577e-06	cited4a
5.75217e-11	1.43811	0.241	0.123	1.97783e-06	hhla2a.1
8.93923e-11	0.598566	0.606	0.538	3.07367e-06	tagln2
8.9794e-11	1.81976	0.178	0.072	3.08748e-06	rnf213a
9.68447e-11	0.887906	0.462	0.351	3.32991e-06	dusp1
1.31634e-10	2.38781	0.122	0.032	4.52611e-06	unkl
1.72483e-10	1.84284	0.173	0.071	5.93066e-06	atp2a3
1.7295e-10	3.00347	0.094	0.012	5.94673e-06	prkx
1.73575e-10	2.43637	0.111	0.025	5.96822e-06	zmp:0000001114
2.09288e-10	1.1349	0.295	0.178	7.19616e-06	il12rb2l
2.41724e-10	2.87739	0.099	0.019	8.31144e-06	rnf44
2.76673e-10	2.13519	0.129	0.039	9.51311e-06	zmiz1a
2.996e-10	1.7111	0.177	0.076	1.03015e-05	swap70b
3.02991e-10	0.969496	0.361	0.249	1.04181e-05	stat5a
3.25056e-10	2.49887	0.112	0.03	1.11767e-05	ifi46
4.96014e-10	4.47663	0.077	0.005	1.70549e-05	dnmt3bb.1
5.17742e-10	2.86779	0.091	0.014	1.7802e-05	LOC101883549
5.63306e-10	1.19969	0.278	0.166	1.93687e-05	si:ch211-199g17.2
6.66563e-10	3.56859	0.08	0.009	2.29191e-05	qsox1
6.98327e-10	3.80734	0.08	0.009	2.40113e-05	LOC108181220
7.17131e-10	1.66503	0.16	0.062	2.46578e-05	si:dkey-188i13.10
1.13238e-09	1.19762	0.262	0.16	3.89357e-05	eif3k
2.14892e-09	0.472443	0.734	0.732	7.38884e-05	arhgdig
2.20024e-09	2.66436	0.092	0.016	7.56529e-05	c6ast1
2.50002e-09	0.968456	0.343	0.24	8.59606e-05	git2a
2.59845e-09	1.93902	0.124	0.041	8.9345e-05	zeb1a
2.8089e-09	3.55895	0.081	0.012	9.65813e-05	hes6
3.05745e-09	3.68924	0.079	0.011	0.000105127	hacd3
3.11663e-09	0.286822	0.907	0.884	0.000107162	cxcr4b
3.17859e-09	0.917798	0.365	0.268	0.000109293	vat1
3.55246e-09	4.60109	0.066	0.004	0.000122148	ggact.2
3.72264e-09	7.93423	0.058	0	0.000127999	LOC100332582
3.73213e-09	3.54205	0.071	0.007	0.000128325	si:dkeyp-85e10.3
3.78224e-09	1.03338	0.265	0.157	0.000130048	wasa
4.08578e-09	1.31903	0.237	0.136	0.000140485	tagapb
5.02312e-09	3.41396	0.074	0.009	0.000172715	selenou1b
5.05968e-09	0.440175	0.8	0.802	0.000173972	scinlb
8.89308e-09	0.572845	0.586	0.524	0.00030578	plxnc1
9.66146e-09	1.03297	0.294	0.196	0.0003322	abca2
9.95325e-09	1.75061	0.137	0.053	0.000342232	kdm6bb
1.21214e-08	0.228931	0.934	0.984	0.000416782	rps21
1.52362e-08	1.32814	0.211	0.115	0.000523883	fli1b
1.74802e-08	1.76135	0.141	0.058	0.00060104	asap1b
1.95751e-08	0.514761	0.655	0.647	0.000673069	LOC101884267
2.08735e-08	1.01667	0.25	0.15	0.000717714	psmb8a
2.73284e-08	2.16522	0.109	0.035	0.000939661	BX248510.5
2.80539e-08	1.07735	0.279	0.182	0.000964606	sh3bgrl3
3.33354e-08	2.52939	0.091	0.023	0.00114621	matk
3.51344e-08	4.00545	0.062	0.005	0.00120806	gstm.2
3.51428e-08	2.26949	0.093	0.025	0.00120835	irgq2
3.5374e-08	0.976569	0.312	0.22	0.0012163	gstp1
3.65397e-08	3.47985	0.07	0.011	0.00125638	si:ch211-14c7.2
4.1955e-08	2.26282	0.089	0.023	0.00144258	aldh2.2
4.54402e-08	1.984	0.117	0.042	0.00156242	tfe3a
4.81133e-08	1.075	0.306	0.21	0.00165433	sptlc2a
5.8732e-08	1.91853	0.124	0.048	0.00201944	myb
6.34679e-08	2.18369	0.099	0.03	0.00218228	LOC110437941
6.54809e-08	0.639875	0.576	0.522	0.00225149	fosab
6.64561e-08	1.16692	0.279	0.185	0.00228503	si:ch73-208g10.1
6.85281e-08	1.40205	0.201	0.115	0.00235627	camkk1a
7.97061e-08	2.66459	0.086	0.021	0.00274061	sesn3
8.59471e-08	3.58971	0.056	0.004	0.00295521	gig2j
8.75929e-08	1.4409	0.174	0.088	0.0030118	rock2a
9.45911e-08	1.81115	0.138	0.06	0.00325242	LOC103909422
9.62986e-08	0.679081	0.513	0.451	0.00331113	dgkzb
1.02979e-07	2.69427	0.079	0.018	0.00354085	tnfsf18
1.06694e-07	1.92852	0.117	0.044	0.00366856	mkrn1
1.15823e-07	0.353554	0.839	0.832	0.00398247	itgb2
1.17864e-07	0.756623	0.388	0.3	0.00405262	si:dkey-112e7.2
1.28662e-07	3.51757	0.063	0.009	0.00442391	si:dkey-28k24.2
1.3617e-07	0.872492	0.328	0.235	0.00468206	midn
1.50685e-07	1.99713	0.095	0.026	0.00518115	rsl1d1
1.51546e-07	0.56161	0.543	0.496	0.00521075	serbp1a
1.84855e-07	1.12512	0.249	0.157	0.00635606	sybl1
1.87526e-07	1.86816	0.089	0.023	0.0064479	CABZ01046432.1
1.88865e-07	3.46132	0.059	0.007	0.00649392	LOC101883382
2.00441e-07	1.74666	0.094	0.028	0.00689197	sash3
2.21306e-07	1.36934	0.192	0.109	0.00760938	si:ch211-197k17.3
2.2601e-07	1.6314	0.122	0.048	0.00777111	si:dkey-34d22.5
2.53372e-07	4.79853	0.049	0.002	0.00871194	epob
2.74551e-07	2.75157	0.065	0.011	0.00944017	gig2i
2.95897e-07	2.43092	0.086	0.025	0.0101741	deptor
2.96812e-07	1.58832	0.157	0.076	0.0102056	si:ch211-226m16.2
3.31996e-07	1.54248	0.151	0.076	0.0114153	lnpep
3.38567e-07	7.39442	0.043	0	0.0116413	FO904898.1
3.43759e-07	4.493	0.051	0.002	0.0118198	spns2
3.99778e-07	1.15292	0.187	0.106	0.013746	wipf1b
4.20545e-07	4.67795	0.05	0.004	0.01446	CR381673.2
4.49833e-07	2.75807	0.063	0.011	0.0154671	FP085398.1
4.61905e-07	1.86612	0.218	0.125	0.0158821	si:ch211-250g4.3
4.64793e-07	1.85585	0.1	0.034	0.0159814	sulf2b
4.66343e-07	1.46436	0.127	0.055	0.0160348	gigyf1a
4.69012e-07	2.66098	0.061	0.009	0.0161265	mtmr8
4.95723e-07	0.709687	0.431	0.365	0.0170449	ptbp3
5.47567e-07	4.89857	0.046	0.002	0.0188275	carhsp1
5.53113e-07	2.75921	0.074	0.018	0.0190182	BX664618.1
5.61839e-07	2.8188	0.063	0.011	0.0193183	arhgap27l
5.62157e-07	1.9986	0.092	0.03	0.0193292	BX322587.1
5.76295e-07	1.87873	0.097	0.034	0.0198153	ftr98
6.61031e-07	1.22452	0.196	0.116	0.0227289	hlx1
6.90614e-07	2.98051	0.055	0.007	0.0237461	si:ch211-260e23.9
6.91194e-07	1.60738	0.124	0.051	0.023766	nr3c1
7.04395e-07	0.491007	0.576	0.57	0.0242199	rpl4
7.18611e-07	3.76054	0.052	0.005	0.0247087	ubald1a
7.53158e-07	0.981984	0.258	0.173	0.0258966	triobpa
7.9953e-07	1.17576	0.221	0.139	0.027491	ch25hl2
8.42527e-07	1.89759	0.086	0.026	0.0289694	si:dkey-159f12.2
8.69361e-07	2.07358	0.1	0.037	0.0298921	si:ch211-281l24.3
9.27067e-07	1.88257	0.103	0.039	0.0318763	mctp1b
9.37138e-07	2.47552	0.074	0.019	0.0322226	isg15
9.61921e-07	1.34385	0.14	0.065	0.0330747	krt8
1.09574e-06	0.445817	0.659	0.631	0.0376761	ppdpfa
1.1736e-06	1.51734	0.121	0.051	0.0403531	nupr1a
1.18372e-06	2.9808	0.056	0.009	0.0407012	si:ch211-79k12.1
1.21045e-06	1.31994	0.146	0.072	0.0416203	si:ch211-181d7.3
1.21984e-06	0.478998	0.766	0.771	0.0419431	socs3a
1.26127e-06	7.25388	0.04	0	0.0433675	hhla2a.2
1.32583e-06	0.813792	0.35	0.279	0.0455875	ostf1
1.37459e-06	0.841559	0.391	0.317	0.0472638	CHST13
1.40534e-06	3.2493	0.056	0.009	0.0483213	pkig
1.40673e-06	2.0325	0.084	0.025	0.0483691	MCMDC2
1.42593e-06	3.57836	0.049	0.005	0.049029	CABZ01061591.1
1.43822e-06	7.30052	0.04	0	0.0494518	zgc:171500
1.44801e-06	2.72228	0.06	0.011	0.0497884	sat1b
1.55905e-06	0.730005	0.297	0.21	0.0536064	cited4b
1.60425e-06	2.68213	0.062	0.012	0.0551606	CR381673.1
1.85748e-06	1.35963	0.113	0.046	0.0638678	gig2h
1.96945e-06	0.23884	0.902	0.94	0.0677176	rpl22
2.15306e-06	1.43615	0.124	0.056	0.0740309	inpp4aa
2.28241e-06	3.21454	0.049	0.005	0.0784783	elmsan1a
2.35052e-06	4.8042	0.041	0.002	0.0808203	kita
2.47135e-06	4.22233	0.045	0.004	0.0849749	slc4a1a
2.64516e-06	1.08596	0.199	0.123	0.090951	abi3a
2.65073e-06	0.388388	0.749	0.772	0.0911427	rps26
2.89142e-06	2.02543	0.079	0.023	0.0994186	pinx1
2.98118e-06	2.69204	0.059	0.012	0.102505	rc3h2
2.99869e-06	1.44756	0.151	0.078	0.103107	hpgd
3.09957e-06	2.22205	0.066	0.016	0.106576	wee2
3.38717e-06	1.09672	0.158	0.088	0.116464	tp53i11b
3.47057e-06	4.76194	0.039	0.002	0.119332	si:dkey-208m12.2
3.47359e-06	0.702728	0.348	0.282	0.119436	eif3m
3.58831e-06	0.994914	0.239	0.164	0.12338	LOC103911430
4.2624e-06	1.22651	0.153	0.085	0.146558	sort1b
4.45277e-06	3.03539	0.049	0.007	0.153104	thada
4.45359e-06	0.482159	0.542	0.473	0.153132	id3
4.88453e-06	2.81209	0.049	0.007	0.16795	tgfbi
4.9904e-06	1.55876	0.115	0.049	0.17159	dyrk1b
5.08858e-06	0.602376	0.577	0.534	0.174966	kcnq5b
5.17356e-06	0.28211	0.823	0.892	0.177888	rpl34
5.30875e-06	1.57206	0.093	0.035	0.182536	si:ch73-22o12.1
5.38391e-06	0.642674	0.378	0.314	0.18512	eef1db
5.49724e-06	2.90025	0.052	0.009	0.189017	b3gnt2l
5.74222e-06	1.10334	0.148	0.079	0.197441	elmsan1b
6.08212e-06	7.09814	0.035	0	0.209128	si:dkey-165a24.10
6.10593e-06	1.02021	0.203	0.131	0.209946	pstpip1a
6.50952e-06	1.30054	0.117	0.055	0.223823	abcc13
6.62849e-06	4.81893	0.038	0.002	0.227914	ly6m5
6.63632e-06	1.10031	0.212	0.139	0.228183	sept9b
6.67633e-06	2.00359	0.076	0.026	0.229559	ncoa2
6.99345e-06	1.14737	0.185	0.116	0.240463	btbd11b
7.07464e-06	1.77053	0.088	0.034	0.243254	nmi
7.54438e-06	0.688709	0.402	0.337	0.259406	si:cabz01036022.1
7.5783e-06	4.91127	0.038	0.002	0.260572	lgals17
7.60636e-06	1.28459	0.162	0.093	0.261537	bdh1
7.63873e-06	1.14174	0.183	0.109	0.26265	si:ch211-105j21.9
8.87524e-06	2.60136	0.061	0.016	0.305166	slc40a1
9.53283e-06	1.36665	0.135	0.071	0.327777	lyst
1.05263e-05	0.71022	0.368	0.305	0.361936	si:dkey-53k12.2
1.08249e-05	0.957726	0.196	0.125	0.372202	si:dkey-56i24.1
1.09298e-05	1.75014	0.097	0.042	0.375812	ulk1a
1.11425e-05	0.228488	0.865	0.947	0.383123	rps26l
1.162e-05	0.893662	0.256	0.18	0.399544	nbeal2
1.18522e-05	0.727077	0.276	0.199	0.407525	tpd52
1.19182e-05	0.410025	0.685	0.702	0.409795	rps3
1.21343e-05	0.784713	0.297	0.224	0.417227	elmo1
1.27619e-05	0.640096	0.403	0.353	0.438805	pgd
1.29689e-05	1.23248	0.13	0.067	0.445922	aldh9a1a.1
1.31092e-05	1.5216	0.102	0.044	0.450748	mmd2a
1.32079e-05	2.31049	0.063	0.018	0.454139	cspp1b
1.36987e-05	1.21336	0.156	0.09	0.471017	sb:cb81
1.38823e-05	1.49985	0.112	0.053	0.47733	zgc:175088
1.39322e-05	3.38365	0.045	0.007	0.479045	mid2
1.45265e-05	2.92417	0.046	0.007	0.499479	msl2b
1.52445e-05	0.760823	0.341	0.275	0.524168	fam49bb
1.696e-05	2.76526	0.046	0.007	0.583152	cxxc1a
1.71681e-05	2.35376	0.059	0.016	0.590308	rpz2
1.86095e-05	1.48178	0.11	0.051	0.639868	slc25a28
1.88923e-05	2.08897	0.072	0.025	0.649592	ptpn11b
1.93417e-05	0.874091	0.33	0.277	0.665044	sema4aa
1.97908e-05	1.33501	0.126	0.065	0.680487	mxd1
2.16267e-05	0.928899	0.221	0.15	0.743614	btg2
2.18409e-05	4.11058	0.037	0.004	0.750976	si:dkey-169i5.4
2.34261e-05	3.47597	0.044	0.005	0.805483	braf
2.412e-05	1.54198	0.087	0.035	0.829341	tm7sf3
2.50634e-05	1.23873	0.147	0.083	0.861778	zeb2a
2.56189e-05	2.68308	0.044	0.007	0.880879	ptgs1
2.56764e-05	2.48968	0.071	0.023	0.882857	arhgef18b
2.84729e-05	0.911666	0.247	0.178	0.979013	pqlc2
2.93058e-05	2.26701	0.058	0.016	1	LOC100538052
2.99741e-05	2.02437	0.068	0.023	1	araf
3.08552e-05	1.29211	0.122	0.063	1	gpatch8
3.20328e-05	4.77033	0.033	0.002	1	ighv1-4
3.49152e-05	1.41074	0.109	0.053	1	si:dkey-250d21.1
3.52745e-05	3.10036	0.046	0.009	1	kel
3.64177e-05	2.57862	0.048	0.011	1	tjp1b
3.66878e-05	0.95802	0.139	0.078	1	dagla
3.82172e-05	2.07572	0.068	0.023	1	kdm6a
3.903e-05	0.860448	0.203	0.138	1	BX005340.1
3.92158e-05	1.34921	0.122	0.065	1	arhgap27
4.06394e-05	1.08529	0.148	0.088	1	si:ch211-271d10.2
4.12127e-05	4.89985	0.033	0.002	1	si:dkey-188g12.1
4.19509e-05	4.29414	0.033	0.002	1	lrmp
4.34659e-05	3.82722	0.035	0.004	1	brsk2b
4.52203e-05	2.28569	0.048	0.011	1	si:ch211-197h24.9
4.84711e-05	3.69756	0.036	0.004	1	DGKI
4.8557e-05	4.16847	0.032	0.002	1	foxq1a
4.94064e-05	3.02434	0.038	0.005	1	fkbp1ab
5.03754e-05	0.98886	0.23	0.169	1	si:rp71-1g18.13
5.28778e-05	1.34701	0.123	0.067	1	ubald2
5.61987e-05	6.88888	0.028	0	1	CABZ01072487.1
5.65264e-05	3.54721	0.035	0.004	1	LOC100333434
5.65526e-05	1.17878	0.137	0.079	1	ppargc1b
5.66395e-05	1.55939	0.074	0.028	1	fam78ab
5.69118e-05	0.545119	0.437	0.381	1	nfkbiab
5.71194e-05	1.22271	0.147	0.086	1	sc:d156
5.97317e-05	0.778953	0.253	0.185	1	inpp5d
6.24761e-05	1.24516	0.116	0.06	1	cyth1b
6.26782e-05	1.88944	0.056	0.016	1	LOC101884510
6.40495e-05	6.61839	0.028	0	1	ap1g2
6.71052e-05	2.87302	0.041	0.007	1	si:ch211-147a11.3
6.82097e-05	1.2823	0.103	0.051	1	mxd4
7.47137e-05	2.07895	0.052	0.014	1	brms1la
7.67087e-05	1.84715	0.068	0.025	1	psmb9a
7.85624e-05	1.46938	0.063	0.021	1	tesk2
7.98248e-05	4.73877	0.03	0.002	1	slc7a2
8.31973e-05	6.58464	0.027	0	1	tor1l3
8.41593e-05	0.719258	0.34	0.287	1	LOC108183614
8.5629e-05	2.03233	0.067	0.026	1	histh1l
8.79946e-05	1.73349	0.06	0.019	1	cbr1l
8.81278e-05	1.10827	0.106	0.053	1	nol4la
9.08652e-05	0.677085	0.338	0.282	1	gmfg
9.10916e-05	1.43499	0.103	0.053	1	GNAZ
9.43586e-05	1.26947	0.127	0.072	1	csk
9.53505e-05	2.18471	0.046	0.011	1	htatip2
0.000104341	1.45303	0.102	0.051	1	mibp
0.000106308	3.17339	0.039	0.007	1	tfap4
0.000108077	6.66451	0.026	0	1	si:ch211-281g13.4
0.000108534	1.37546	0.093	0.044	1	si:dkey-42l23.9
0.000108844	1.47954	0.073	0.03	1	arrb2a
0.000110113	0.910064	0.21	0.146	1	fmo5
0.00011453	1.18636	0.133	0.078	1	klf7b
0.000118255	1.43028	0.109	0.06	1	zgc:174904
0.000121589	4.02445	0.029	0.002	1	epor
0.000129465	2.34702	0.05	0.014	1	selenoj
0.000131844	1.53677	0.08	0.035	1	oga
0.000133192	1.05653	0.15	0.093	1	pim2
0.00013336	1.62333	0.081	0.037	1	pik3r2
0.000133874	1.38716	0.083	0.037	1	sgpp1
0.000138723	0.539602	0.427	0.392	1	ponzr1
0.000140408	6.42389	0.025	0	1	CABZ01079302.1
0.000143301	1.36884	0.111	0.06	1	si:ch211-132g1.3
0.000144724	1.55069	0.095	0.048	1	uvrag
0.000145685	1.64575	0.084	0.039	1	phkb
0.000147398	2.49548	0.041	0.009	1	slc25a22a
0.000148147	1.89054	0.064	0.025	1	CU639397.1
0.000148397	0.748183	0.304	0.249	1	ldhba
0.000149454	1.19779	0.129	0.076	1	atrnl1b
0.000150482	2.4291	0.038	0.007	1	peak3
0.000151314	0.439669	0.528	0.519	1	lta4h
0.000157029	3.67991	0.032	0.004	1	ada2a
0.000157029	3.97411	0.032	0.004	1	nrxn2a
0.000157509	0.87897	0.195	0.134	1	ube4b
0.000160045	6.49793	0.024	0	1	CU571318.1
0.000163882	2.5024	0.034	0.005	1	si:ch211-1a19.3
0.000165191	0.910493	0.196	0.136	1	arhgef6
0.000165681	2.14931	0.056	0.019	1	phf20b
0.000169901	1.02557	0.147	0.092	1	zgc:194312
0.000172418	3.2111	0.034	0.005	1	mif4gdb
0.000173026	1.36889	0.095	0.048	1	gusb
0.000176245	4.20239	0.028	0.002	1	usp1
0.000176338	1.24852	0.136	0.081	1	ralgapa1
0.000177142	0.469827	0.386	0.314	1	si:ch1073-67j19.1
0.000177582	4.05156	0.028	0.002	1	CR388079.3
0.000179339	0.922927	0.186	0.127	1	mbnl3
0.00018163	0.223804	0.844	0.908	1	rplp0
0.000182433	6.47124	0.024	0	1	si:dkey-19a16.7
0.000182433	6.65025	0.024	0	1	zgc:113208
0.000184316	1.08062	0.167	0.111	1	march7
0.000184354	0.89349	0.274	0.224	1	si:ch73-1a9.3
0.000185701	1.63908	0.06	0.021	1	irf1b
0.000191358	1.65343	0.08	0.037	1	crebrf
0.000203469	4.03226	0.028	0.002	1	noctb
0.000207322	2.45234	0.042	0.011	1	vdac1
0.000207961	6.37646	0.023	0	1	eml1
0.000208423	2.56272	0.039	0.009	1	kdm2ba
0.000209422	1.03613	0.154	0.093	1	sephs2
0.000230135	2.83568	0.039	0.009	1	lonrf1
0.00023123	2.52563	0.033	0.005	1	phf11
0.000235534	0.631458	0.372	0.33	1	amd1
0.000236705	1.25173	0.099	0.053	1	cdc25b
0.000237071	6.43781	0.023	0	1	eif4e2
0.000237071	6.72461	0.023	0	1	stat1b
0.000240809	0.981441	0.187	0.129	1	csgalnact1a
0.000242285	0.631557	0.307	0.245	1	junba
0.000243334	0.874962	0.201	0.145	1	cd99
0.000251868	1.54726	0.063	0.025	1	CU467961.1
0.00025864	1.74693	0.072	0.03	1	ppp4r1
0.000266703	2.82154	0.036	0.007	1	si:ch211-188c18.1
0.000268159	2.5929	0.033	0.005	1	mov10b.2
0.000270268	6.37917	0.023	0	1	FO744833.2
0.000272531	0.97326	0.149	0.095	1	ppp1r14aa
0.000274856	1.02728	0.142	0.088	1	entpd1
0.00027497	2.651	0.036	0.007	1	si:dkey-237j10.2
0.000275169	1.84985	0.06	0.023	1	ncoa6
0.000280392	1.75318	0.045	0.012	1	rnasekb
0.000280667	1.71025	0.059	0.023	1	si:rp71-79p20.2
0.000284196	0.993308	0.152	0.099	1	si:dkey-180p18.9
0.000288322	1.60043	0.067	0.028	1	hdac11
0.000289672	1.52175	0.048	0.014	1	cacng3b
0.000292861	0.698607	0.43	0.406	1	socs3b
0.000296966	2.87765	0.035	0.007	1	tssc4
0.000299231	3.94173	0.026	0.002	1	klhl24b
0.000300294	1.72446	0.051	0.018	1	jdp2b
0.000300472	1.89299	0.067	0.028	1	BX957297.2
0.000309065	0.388475	0.597	0.594	1	cox6b2
0.000311155	1.43172	0.079	0.037	1	ppp1r9a
0.000314725	1.35069	0.09	0.046	1	zgc:55262
0.000337419	0.97335	0.169	0.115	1	foxp1b
0.000341225	2.16947	0.044	0.012	1	smc5
0.00035131	6.03774	0.022	0	1	NPC2 (1 of many)
0.00035131	6.52174	0.022	0	1	dcun1d4
0.00035131	6.48887	0.022	0	1	LOC110439385
0.000354426	2.12487	0.047	0.014	1	vgll3
0.00037075	2.39177	0.046	0.012	1	LOC110438323
0.000371287	3.22373	0.035	0.007	1	nexmifb
0.000371812	3.42136	0.035	0.005	1	mmp14b
0.000376316	1.57194	0.086	0.044	1	LOC101884253
0.000377955	0.335692	0.609	0.6	1	tln1
0.000384854	4.41676	0.029	0.002	1	RALGDS
0.000386038	0.610226	0.38	0.325	1	pde4cb
0.000393612	0.697981	0.269	0.219	1	rinl
0.000397052	0.995896	0.181	0.131	1	mgat5
0.000400315	0.759707	0.261	0.206	1	sptbn2
0.000419449	0.818782	0.261	0.21	1	atp11c
0.000443962	0.930446	0.159	0.104	1	gpr183a
0.000450354	0.586628	0.334	0.28	1	sgk1
0.000463458	1.55937	0.066	0.026	1	tmem43
0.00047154	0.325729	0.646	0.661	1	ccni
0.000475006	1.63498	0.051	0.018	1	mlf2
0.000475675	2.0958	0.051	0.016	1	cdc42ep4a
0.00048192	1.85745	0.046	0.014	1	mgat3a
0.000482601	1.33644	0.075	0.035	1	sdcbp
0.000484889	0.659006	0.36	0.314	1	trib3
0.000501623	1.07132	0.136	0.083	1	nfic
0.000502837	1.38457	0.073	0.034	1	LOC101883913
0.0005112	3.66097	0.024	0.002	1	stx3a
0.00051698	0.664069	0.342	0.298	1	cybb
0.000518142	2.35781	0.043	0.012	1	si:dkey-152b24.7
0.00052087	6.3772	0.02	0	1	znf438
0.000523433	1.93434	0.05	0.018	1	LOC110438330
0.000537873	1.42406	0.066	0.028	1	rps27l
0.000538122	3.05943	0.036	0.007	1	vil1
0.000542649	1.29465	0.079	0.041	1	arl5c
0.000548606	1.47988	0.103	0.06	1	def8
0.000548862	1.13118	0.123	0.074	1	zdhhc8b
0.000555795	0.81514	0.17	0.118	1	nop53
0.000563264	0.733943	0.25	0.198	1	tnfaip8l2a
0.000564671	0.953779	0.139	0.088	1	afap1l1b
0.000574122	0.457401	0.475	0.455	1	svild
0.000576009	0.779646	0.191	0.136	1	ncalda
0.000594023	6.29543	0.02	0	1	LOC110438348
0.000620685	1.2427	0.1	0.055	1	gigyf1b
0.000621802	0.774853	0.226	0.173	1	rnf144b
0.000626834	1.85048	0.055	0.021	1	prkd3
0.000635107	2.60222	0.03	0.005	1	LOC103910909
0.000644975	1.08205	0.138	0.088	1	cers1
0.000668012	3.5121	0.023	0.002	1	TBC1D8B
0.000673626	1.87434	0.056	0.021	1	rsf1b.1
0.000677504	6.51878	0.02	0	1	LOC100004944
0.00067915	1.40892	0.093	0.046	1	ppp3r1a
0.000683581	0.812912	0.192	0.138	1	arhgap4b
0.000687456	0.725447	0.25	0.198	1	dhrs9
0.00071264	1.57554	0.056	0.023	1	nt5c2l1
0.000722794	1.07738	0.114	0.067	1	ugp2b
0.000727048	0.760577	0.219	0.166	1	ved
0.000730017	1.72568	0.049	0.018	1	kidins220a
0.000730897	0.842608	0.173	0.122	1	cyth4b
0.000740802	1.8441	0.042	0.014	1	xkrx
0.000753466	2.04396	0.038	0.011	1	PDE3B
0.000772784	6.54345	0.019	0	1	p2ry8
0.000827388	1.50285	0.072	0.034	1	mapk14a
0.000831436	0.952423	0.16	0.111	1	CABZ01073834.1
0.000832294	1.16618	0.084	0.044	1	ndfip1l
0.000846711	1.85516	0.046	0.016	1	atg3
0.000871245	0.605795	0.294	0.245	1	caprin1b
0.000881544	6.41672	0.019	0	1	zgc:165583
0.000895639	1.0481	0.116	0.071	1	rps6ka5
0.000911789	1.02723	0.14	0.095	1	slmapa
0.000936437	2.51783	0.029	0.005	1	si:dkey-9i23.15
0.000951572	2.16013	0.041	0.012	1	exoc5
0.000952153	2.24505	0.041	0.012	1	mapk14b
0.000958337	4.41062	0.022	0.002	1	znf1001
0.000969572	3.79103	0.023	0.002	1	irf2bp2b
0.000979673	2.09198	0.031	0.007	1	zmp:0000000991
0.00100571	6.12254	0.018	0	1	CABZ01021532.1
0.00100571	5.89256	0.018	0	1	ndr2
0.00101144	0.954923	0.16	0.111	1	ppp1r9ba
0.00102346	1.98675	0.043	0.014	1	grk5l
0.001026	1.36321	0.081	0.042	1	SLC46A3 (1 of many)
0.0010583	2.15793	0.047	0.014	1	alas2
0.00106023	1.88267	0.042	0.014	1	pycard
0.00106418	2.03672	0.045	0.016	1	irs1
0.00109391	1.06273	0.099	0.056	1	pde4ca
0.00111003	2.02791	0.04	0.012	1	cbx1a
0.00111882	1.94145	0.04	0.012	1	arrdc2
0.00112869	1.21339	0.081	0.042	1	runx3
0.00114749	6.12055	0.018	0	1	plppr2b
0.001154	1.40571	0.067	0.032	1	eepd1
0.0011671	0.807337	0.187	0.139	1	gtpbp4
0.00117351	1.48345	0.077	0.039	1	bnip3lb
0.00117444	0.465183	0.671	0.681	1	zgc:162730
0.00121342	1.69403	0.052	0.021	1	zgc:165582
0.00125094	4.28256	0.022	0.002	1	smchd1
0.00128006	1.95249	0.042	0.014	1	rgs18
0.00129946	3.01664	0.028	0.005	1	si:dkey-58f10.11
0.00130576	1.95286	0.049	0.018	1	grinab
0.00130941	6.11547	0.018	0	1	BX465228.1
0.00130941	6.25131	0.018	0	1	ggctb
0.00135952	1.69523	0.052	0.021	1	erg
0.00136377	1.4942	0.044	0.016	1	asxl2
0.00136966	1.82097	0.044	0.016	1	znf618
0.00137368	1.10134	0.135	0.09	1	klc1a
0.00139567	1.26171	0.09	0.051	1	slc12a2
0.00142209	3.74565	0.023	0.002	1	si:ch211-119e14.1
0.00142757	3.24407	0.025	0.004	1	LOC101885027
0.00145344	1.83009	0.056	0.025	1	caska
0.00146599	0.965375	0.153	0.106	1	sla1
0.00147433	0.826075	0.187	0.139	1	thrap3b
0.00147882	0.880501	0.155	0.106	1	si:dkey-83k24.5
0.00149436	5.79894	0.018	0	1	amotl2b
0.00150624	0.630127	0.309	0.257	1	tmem131l
0.00150752	1.28749	0.059	0.026	1	crebl2
0.00152884	2.70047	0.028	0.005	1	si:ch211-11c3.12
0.00157046	1.03162	0.092	0.053	1	map2k6
0.00157149	0.758517	0.172	0.125	1	tefa
0.0015724	2.06668	0.033	0.009	1	ubp1
0.00157528	1.10232	0.089	0.049	1	haao
0.00158667	1.51493	0.054	0.023	1	pdik1l
0.0015979	3.77997	0.024	0.004	1	LOC108183319
0.00163913	1.33489	0.069	0.035	1	tor4aa
0.00164013	3.71281	0.021	0.002	1	rhbdl2
0.00164285	3.72827	0.021	0.002	1	cdc42ep2
0.00164558	3.68791	0.021	0.002	1	itsn2a
0.00166892	3.17046	0.02	0.002	1	myclb
0.00167169	3.21108	0.021	0.002	1	CR388079.1
0.00170796	1.66626	0.053	0.023	1	pdia5
0.00171876	2.66182	0.029	0.007	1	phf2
0.00175101	2.67062	0.026	0.005	1	rbm38
0.00176511	2.23009	0.033	0.009	1	klhl24a
0.00180772	1.28401	0.084	0.046	1	slc4a11
0.0018125	0.898893	0.16	0.115	1	ISCU (1 of many)
0.00189983	0.547491	0.3	0.256	1	si:dkey-185m8.2
0.00190055	1.37271	0.057	0.026	1	bcl2a
0.00190706	0.532466	0.375	0.339	1	baz2ba
0.00191918	1.43047	0.074	0.037	1	tspan4b
0.00192145	0.639324	0.272	0.233	1	rhof
0.00193842	1.95344	0.036	0.011	1	brms1
0.00194711	6.05283	0.017	0	1	si:ch73-27e22.8
0.0019594	1.60041	0.056	0.025	1	CRACR2A
0.00201649	0.651928	0.256	0.215	1	grap2b
0.00202784	1.17628	0.08	0.044	1	grb10b
0.00203894	2.38166	0.03	0.007	1	znf511
0.00209898	1.4401	0.05	0.021	1	s100z
0.00210104	1.80449	0.037	0.012	1	si:ch211-150o23.2
0.00212273	3.76794	0.02	0.002	1	si:ch211-253b8.2
0.00215103	3.49847	0.02	0.002	1	sptbn1
0.00216531	3.32485	0.02	0.002	1	CABZ01072487.2
0.00217223	0.708604	0.207	0.155	1	fam162a
0.00217345	2.23124	0.034	0.009	1	npl
0.00220304	3.03792	0.026	0.005	1	gpat3
0.00222013	1.56163	0.048	0.019	1	itgam
0.00222309	5.96698	0.016	0	1	bnip4
0.00222309	5.84359	0.016	0	1	dusp23b
0.00223146	0.722817	0.184	0.139	1	eif4ebp1
0.00227321	2.55987	0.025	0.005	1	ptpra
0.00230003	2.45018	0.035	0.009	1	sesn1
0.00232735	1.35019	0.051	0.021	1	cldn15lb
0.00232881	0.685636	0.181	0.131	1	ppifb
0.00235083	1.43556	0.068	0.034	1	insra
0.00239925	1.37414	0.063	0.032	1	park7
0.00247083	1.59225	0.057	0.026	1	rassf1
0.00247326	0.824924	0.155	0.108	1	ak1
0.00248833	1.13278	0.069	0.035	1	shc2
0.00250941	0.949386	0.099	0.058	1	fbxw7
0.00253153	2.72552	0.026	0.005	1	uhmk1
0.00253859	5.86599	0.015	0	1	esco2
0.00253859	5.98618	0.015	0	1	si:dkey-58f10.12
0.00253859	6.08807	0.016	0	1	LOC100535806
0.00260627	2.41476	0.026	0.005	1	BX950187.1
0.00260956	1.55864	0.056	0.026	1	CU929070.1
0.00261599	0.288677	0.635	0.646	1	eef2b
0.00264041	0.81346	0.172	0.125	1	xiap
0.00264043	1.85458	0.039	0.014	1	trim44
0.00267453	1.61612	0.054	0.023	1	BX649411.1
0.00269588	0.364244	0.558	0.559	1	actn4
0.0027118	1.9788	0.034	0.011	1	nuggc.2
0.00274519	1.29648	0.063	0.03	1	si:dkey-117a8.1
0.00275084	0.586771	0.297	0.256	1	qkia
0.00277813	3.57633	0.019	0.002	1	supt20
0.00278503	3.41631	0.019	0.002	1	prr13
0.00280004	1.0982	0.068	0.035	1	si:ch211-239f4.1
0.00281509	3.20666	0.019	0.002	1	ugt1a7
0.00282673	3.01415	0.018	0.002	1	zbtb22a
0.00285845	1.78821	0.037	0.012	1	dctn5
0.00289937	5.92374	0.015	0	1	igf2bp3
0.00290644	2.51485	0.025	0.005	1	zgc:101016
0.00291261	2.55869	0.025	0.005	1	si:dkey-262k9.2
0.00294701	1.72473	0.046	0.019	1	si:ch211-108d22.2
0.00294924	1.79713	0.041	0.016	1	heca
0.00295415	1.98662	0.031	0.009	1	si:dkey-16p21.8
0.00301224	1.18565	0.059	0.028	1	cep131
0.00302747	0.852963	0.129	0.086	1	tnrc6a
0.00308596	1.57038	0.028	0.007	1	slc25a44b
0.00308905	0.771939	0.188	0.143	1	ccm2
0.00310473	1.40154	0.076	0.039	1	arhgap1
0.00313896	1.2061	0.102	0.065	1	BX548046.2
0.00314123	1.94682	0.041	0.016	1	abca3b
0.00314325	2.87374	0.022	0.004	1	bach2a
0.00314735	3.81476	0.019	0.002	1	parp9
0.00314996	4.11434	0.018	0.002	1	LO018564.1
0.00318168	1.11691	0.095	0.053	1	bloc1s6
0.00319448	3.27888	0.018	0.002	1	gnl1
0.00321322	0.516712	0.279	0.235	1	arhgap33
0.00322422	1.41725	0.062	0.032	1	srpk1a
0.00323206	2.68901	0.025	0.005	1	cbx7b
0.00324323	0.785517	0.147	0.104	1	tprg1l
0.00326193	1.50716	0.049	0.021	1	si:dkey-57k2.7
0.00329076	2.57238	0.025	0.005	1	ube2w
0.00330588	2.61249	0.025	0.005	1	si:ch211-230g15.5
0.00331205	5.79744	0.015	0	1	im:7147486
0.00331205	5.86641	0.015	0	1	fgfr1a
0.00331205	5.88488	0.015	0	1	si:ch211-79k12.2
0.00331205	5.90367	0.015	0	1	zgc:162971
0.00331205	5.78671	0.015	0	1	zgc:172341
0.00334703	1.37845	0.054	0.025	1	tmed5
0.00335751	2.22318	0.025	0.005	1	tpst2
0.00344563	1.05091	0.101	0.063	1	ehmt1b
0.00355201	1.8207	0.045	0.018	1	pdcd4a
0.00359843	2.64242	0.022	0.004	1	mfsd1
0.00361015	1.58802	0.06	0.03	1	pik3cd
0.00362545	3.49484	0.018	0.002	1	p3h1
0.00363347	2.47016	0.028	0.007	1	pcmtd1
0.00364343	3.09252	0.018	0.002	1	ssbp4
0.00369863	0.981229	0.114	0.076	1	LOC103909972
0.00370476	2.6369	0.024	0.005	1	tecrb
0.00378422	5.59221	0.014	0	1	tsc1a
0.00382184	2.08687	0.033	0.011	1	esd
0.00389366	0.861041	0.124	0.085	1	naa10
0.00391982	1.55793	0.041	0.016	1	cdc14b
0.00398814	3.19432	0.021	0.004	1	zgc:153151
0.00399361	2.02223	0.035	0.012	1	evi5b
0.00401505	1.51451	0.057	0.028	1	ralgps1
0.00403653	2.89506	0.02	0.004	1	zgc:154075
0.00407318	2.78751	0.021	0.004	1	tsc2
0.00407625	2.70388	0.021	0.004	1	si:ch211-222k6.3
0.00410704	1.20707	0.095	0.06	1	ophn1
0.00411508	0.325037	0.584	0.596	1	cap1
0.00412652	2.59227	0.026	0.007	1	arl9
0.00420072	2.91214	0.018	0.002	1	ggact.3
0.00422765	1.64514	0.043	0.018	1	scp2a
0.00424786	0.558518	0.299	0.256	1	actn1
0.0042509	2.26224	0.027	0.007	1	ampd3b
0.00426971	2.32599	0.024	0.005	1	bmp1a
0.00427336	2.05848	0.026	0.007	1	cant1a
0.00429139	1.28315	0.068	0.037	1	prkag2b
0.00431578	1.58919	0.05	0.023	1	stard7
0.00432465	5.76171	0.014	0	1	rnd2
0.00433082	0.495965	0.411	0.39	1	si:ch211-9d9.1
0.004332	1.10153	0.089	0.053	1	mrtfba
0.00435884	1.93364	0.032	0.011	1	ppp6r2b
0.00443579	1.60875	0.048	0.021	1	pld1b
0.00445245	1.91228	0.037	0.014	1	LOC101882843
0.00449071	0.545225	0.353	0.328	1	itm2ba
0.0045237	0.83323	0.156	0.116	1	ssuh2rs1
0.00456994	1.66953	0.042	0.018	1	cc2d1b
0.0045712	0.214892	0.744	0.771	1	coro1a
0.00457624	2.94937	0.02	0.004	1	adpgk
0.00457825	1.64772	0.063	0.034	1	fmr1
0.00458657	3.08904	0.021	0.004	1	fbxl8
0.00459091	2.16992	0.029	0.009	1	znf644a
0.00461768	2.68294	0.021	0.004	1	si:dkeyp-69b9.6
0.00463548	1.3848	0.048	0.023	1	arrdc3a
0.00466864	2.64696	0.027	0.007	1	lcmt1
0.00467216	3.19598	0.023	0.005	1	si:ch1073-358c10.1
0.0046805	2.56774	0.02	0.004	1	tlk1b
0.00471024	3.45272	0.018	0.002	1	st6gal2b
0.00471546	0.997229	0.089	0.055	1	rasa3
0.00471955	0.696663	0.217	0.175	1	zgc:154055
0.00473745	3.30182	0.017	0.002	1	ulk1b
0.00475697	3.2352	0.018	0.002	1	slc25a32a
0.00486524	1.62764	0.049	0.023	1	si:ch211-26b3.4
0.00488185	0.699034	0.16	0.118	1	acss2
0.00494339	5.82665	0.014	0	1	BX323596.2
0.00494339	5.93391	0.013	0	1	sftpbb
0.00507411	0.737013	0.166	0.125	1	pik3r5
0.00509476	2.21046	0.029	0.009	1	tfdp1a
0.00510429	0.454033	0.407	0.386	1	nsa2
0.00511469	0.298471	0.542	0.545	1	rps27.2
0.00518051	3.10107	0.02	0.004	1	shisa4
0.00518418	0.993643	0.086	0.053	1	arap3
0.00524584	1.27118	0.054	0.026	1	dcp2
0.0052496	0.61347	0.246	0.208	1	rpl22l1
0.00536334	1.67443	0.037	0.012	1	phf3
0.00551619	2.24553	0.023	0.005	1	prickle2a
0.00553039	0.745211	0.198	0.157	1	camk2g1
0.00555014	1.20735	0.063	0.034	1	zgc:101715
0.00556887	0.832688	0.18	0.143	1	osbpl1a
0.00557396	1.40992	0.056	0.026	1	commd7
0.00561285	0.960394	0.136	0.095	1	creg1
0.00565206	5.93528	0.013	0	1	dnah11
0.00565206	5.70837	0.013	0	1	mybl2a
0.00565206	5.40182	0.013	0	1	zgc:162509
0.00569867	0.840348	0.093	0.056	1	klhl6
0.00570263	1.60824	0.03	0.011	1	tnksa
0.00570601	1.4054	0.056	0.03	1	tmem248
0.00573134	0.780222	0.144	0.104	1	cnr2
0.00573879	0.519295	0.338	0.312	1	ponzr6
0.00577238	1.74004	0.034	0.012	1	CU459056.2
0.0058493	1.09179	0.107	0.072	1	cdk5rap2
0.00590209	0.626543	0.255	0.217	1	taok3a
0.00592063	1.34708	0.06	0.032	1	LOC100151196
0.00592427	2.51181	0.031	0.009	1	zzz3
0.00594432	2.88222	0.02	0.004	1	zgc:174931
0.00598844	2.40459	0.025	0.007	1	zc4h2
0.00600119	1.09211	0.074	0.044	1	fbxl6
0.00601189	2.47278	0.026	0.007	1	CABZ01077218.1
0.00608812	4.74119	0.017	0.002	1	gabbr1a
0.00610315	3.97235	0.016	0.002	1	si:dkey-163m14.6
0.00611252	3.13145	0.023	0.004	1	tfr1a
0.00614339	3.32115	0.017	0.002	1	nsmaf
0.00616866	3.19187	0.016	0.002	1	si:ch211-227m13.1
0.00623531	1.4801	0.046	0.019	1	ngdn
0.00627537	2.24783	0.023	0.005	1	si:ch211-1f22.13
0.00644312	1.40451	0.06	0.032	1	cdkn1d
0.00646405	5.57258	0.013	0	1	rln3a
0.00646405	5.42676	0.013	0	1	plagl2
0.00646405	5.56364	0.013	0	1	si:ch73-223f5.1
0.0065161	0.863893	0.138	0.101	1	ppm1aa
0.00654504	1.77882	0.033	0.012	1	fam83hb
0.00655315	2.11784	0.028	0.009	1	sinhcaf
0.00656141	1.17708	0.059	0.032	1	sh2b3
0.00662114	0.707096	0.159	0.122	1	morf4l1
0.00668645	1.05046	0.112	0.076	1	LOC558761
0.00669554	1.84235	0.028	0.009	1	zdhhc1
0.00674474	2.90599	0.02	0.004	1	txndc16
0.00674809	1.1676	0.085	0.051	1	zgc:153012
0.00676332	0.719141	0.233	0.19	1	arhgap15
0.00681037	2.63632	0.019	0.004	1	poldip2
0.00686316	2.73996	0.023	0.005	1	trim33l
0.00686916	0.924938	0.123	0.088	1	rasal3
0.00692274	2.20556	0.019	0.004	1	ddx27
0.00700047	3.50291	0.016	0.002	1	tmem9
0.00700551	2.19549	0.02	0.004	1	sirt3
0.00705513	2.34188	0.022	0.005	1	ptger4b
0.00708922	2.35553	0.023	0.005	1	plxna1a
0.00712601	1.54185	0.043	0.019	1	fut9b
0.00716115	1.88241	0.025	0.007	1	LOC110438250
0.00729849	1.53681	0.05	0.025	1	kat7a
0.00739482	5.57248	0.013	0	1	josd1
0.00739482	5.71799	0.013	0	1	mdm1
0.00739482	5.22848	0.013	0	1	smco4
0.0073983	2.37766	0.03	0.011	1	lrrk1
0.00752731	1.34032	0.041	0.018	1	znfl1l
0.00753546	0.849475	0.159	0.122	1	stxbp5b
0.00754431	1.50405	0.041	0.018	1	tmem205
0.00755629	1.0668	0.079	0.048	1	tcea3
0.00756	1.51608	0.038	0.016	1	uqcrc2a
0.00765038	0.713834	0.168	0.129	1	suco
0.00765825	1.05578	0.058	0.032	1	ino80c
0.00771094	0.998497	0.081	0.049	1	lamtor1
0.00777305	0.567372	0.288	0.252	1	FP015862.2
0.00777341	1.92666	0.033	0.012	1	zgc:152774
0.00778643	1.82363	0.033	0.012	1	diablob
0.00794595	4.07545	0.016	0.002	1	prss12
0.0079563	1.00509	0.083	0.051	1	si:dkey-53k12.1
0.00797205	3.93985	0.016	0.002	1	ptprh
0.00797859	4.01482	0.015	0.002	1	bach2b
0.00801186	0.546817	0.202	0.162	1	calm2a
0.00809045	3.02157	0.016	0.002	1	BX323593.1
0.00810813	1.12416	0.068	0.039	1	naga
0.00811804	0.565937	0.221	0.175	1	eif3ha
0.00816893	1.18333	0.089	0.056	1	si:ch211-103n10.5
0.00831453	1.36603	0.047	0.023	1	ccdc6b
0.00832654	0.432067	0.428	0.409	1	limd2
0.00846222	5.59999	0.012	0	1	BX511034.1
0.00846222	5.85442	0.012	0	1	si:ch211-59h6.1
0.00846222	5.20427	0.011	0	1	dnajb2
0.00846222	5.37288	0.012	0	1	comta
0.00846222	5.38628	0.012	0	1	notch1a
0.00846222	5.64905	0.012	0	1	opcml
0.00861343	0.97206	0.096	0.063	1	bmp2k
0.00864157	2.14129	0.032	0.012	1	dnase1l1l
0.00865885	3.50417	0.019	0.004	1	si:ch211-277e21.1
0.00865899	0.782731	0.218	0.183	1	si:ch211-213a13.1
0.00867962	1.48895	0.045	0.021	1	pcxa
0.0087468	1.16086	0.077	0.048	1	si:dkey-172m14.1
0.00877942	2.48799	0.025	0.005	1	adka
0.00880968	0.925831	0.094	0.062	1	prkacaa
0.00884415	1.71237	0.029	0.011	1	pias1a
0.00890305	1.87209	0.035	0.014	1	LOC100330186
0.00896523	2.55578	0.019	0.004	1	notch1b
0.00896545	2.36623	0.022	0.005	1	sgms1
0.00903166	2.19634	0.019	0.004	1	aste1a
0.00904544	2.22828	0.021	0.005	1	zgc:123105
0.00908026	3.79551	0.015	0.002	1	FP236513.1
0.00925134	2.04893	0.019	0.005	1	hipk2
0.00925273	2.99771	0.015	0.002	1	BX511080.1
0.00937286	0.915059	0.127	0.092	1	LOC110438237
0.00945039	0.424572	0.4	0.377	1	prkcda
0.00956983	0.910787	0.072	0.041	1	stk35
0.0095859	1.89853	0.026	0.009	1	tab1
0.00968692	5.44375	0.012	0	1	mark4a
0.00968692	5.84584	0.012	0	1	FP102192.2
0.00968692	5.33426	0.011	0	1	doc2d
0.00968692	5.14747	0.011	0	1	rgn
0.00970873	0.617639	0.209	0.169	1	jpt2
0.00972282	0.974276	0.076	0.046	1	rab3db
0.00976972	1.97077	0.031	0.012	1	tpp1
0.00984666	0.43608	0.332	0.305	1	pak2a
0.00989502	0.954829	0.101	0.067	1	exoc4
0.00989921	1.50207	0.04	0.018	1	si:ch211-216l23.2
0.00991138	0.662734	0.19	0.15	1	sh2d3ca
0.0099826	1.05171	0.087	0.056	1	si:ch211-106e7.2
0.00998712	2.95614	0.018	0.004	1	lias
0.0100759	2.4853	0.018	0.004	1	si:ch73-237c6.1
0.0100777	1.51799	0.036	0.016	1	si:dkey-21o19.2
0.0100902	1.21181	0.07	0.041	1	mfhas1
0.0101835	0.909658	0.078	0.048	1	si:ch211-194k22.8
0.010187	1.47292	0.044	0.021	1	zgc:194981
0.0102095	2.29762	0.021	0.005	1	abtb1
0.0102683	2.18049	0.027	0.009	1	irgf1
0.0102928	1.51432	0.037	0.016	1	ctdsp2
0.0102972	1.59537	0.033	0.014	1	ezh1
0.010308	1.03509	0.079	0.048	1	smim14
0.0104096	1.43876	0.044	0.021	1	mtm1
0.0104126	3.50504	0.015	0.002	1	ppp2r2bb
0.0104334	0.688003	0.236	0.208	1	LOC101885706
0.010443	2.12375	0.027	0.009	1	psmf1
0.0104695	0.775784	0.092	0.06	1	gtf2f1
0.0104723	3.07267	0.015	0.002	1	zgc:92664
0.0104906	1.7007	0.021	0.005	1	ccdc137
0.0105066	2.96845	0.015	0.002	1	si:ch211-212c13.10
0.0105927	2.81785	0.015	0.002	1	si:ch1073-188e1.1
0.0106493	0.647629	0.151	0.113	1	il34
0.0107872	1.87616	0.027	0.009	1	pkp4
0.0108584	0.375437	0.403	0.379	1	stat1a
0.010915	0.796683	0.03	0.011	1	ccr9a
0.0110168	1.202	0.05	0.025	1	mrps18a
0.0110291	1.07661	0.076	0.048	1	vps26a
0.0110487	1.75104	0.032	0.012	1	BX649411.2
0.0110817	2.4771	0.024	0.007	1	st6galnac5b
0.0110929	5.70846	0.011	0	1	syt9b
0.0110929	5.59409	0.011	0	1	btr26
0.0110929	5.3768	0.011	0	1	rnf103
0.0110929	5.21758	0.011	0	1	si:ch211-114c17.1
0.0110929	5.32576	0.011	0	1	si:dkey-84h14.1
0.0110929	5.38523	0.011	0	1	si:dkeyp-75h12.2
0.0110929	5.43348	0.011	0	1	zgc:171490
0.0111664	2.22813	0.023	0.007	1	aifm1
0.0111959	1.34857	0.045	0.023	1	ifi30
0.0112009	3.70417	0.018	0.004	1	si:ch211-11c3.11
0.0112456	1.62896	0.029	0.011	1	ubac1
0.0113169	2.77953	0.018	0.004	1	dpysl5b
0.0113422	0.756351	0.13	0.095	1	tmem14ca
0.0114448	2.47747	0.021	0.005	1	sfxn2
0.0114551	1.13829	0.071	0.042	1	irs2a
0.0116118	0.281606	0.661	0.698	1	ank3b
0.0116166	2.20249	0.02	0.005	1	chst6
0.0116559	2.19597	0.021	0.005	1	stk25b
0.0117859	2.11167	0.026	0.009	1	galns
0.0117978	1.11765	0.063	0.037	1	tmcc3
0.0118672	0.679198	0.168	0.132	1	atf7ip
0.0118784	0.529008	0.183	0.146	1	gadd45ba
0.0119309	0.437234	0.326	0.3	1	vaspa
0.0119429	3.13058	0.014	0.002	1	antxr1c
0.0120309	2.06387	0.028	0.011	1	LOC103910871
0.0120309	2.92763	0.015	0.002	1	si:dkey-34d22.2
0.0124034	1.15943	0.044	0.021	1	galm
0.0126174	2.27449	0.023	0.007	1	ier5l
0.0126726	1.67668	0.031	0.012	1	pigu
0.0127078	5.37209	0.011	0	1	LO018107.1
0.0127078	4.92264	0.01	0	1	hprt1l
0.0127964	2.76743	0.018	0.004	1	znf1068
0.012842	1.9077	0.023	0.007	1	rereb
0.0128906	2.87773	0.018	0.004	1	pik3ap1
0.0129043	1.17923	0.035	0.016	1	exosc1
0.0129473	2.70651	0.017	0.004	1	auts2a
0.0129774	2.34628	0.02	0.005	1	si:dkey-97l20.6
0.0130455	1.70554	0.023	0.007	1	zbtb33
0.0131574	2.28014	0.017	0.004	1	ulk2
0.0132249	1.41134	0.03	0.012	1	c1d
0.0132349	1.41806	0.034	0.014	1	parp12b
0.0133386	1.89769	0.035	0.014	1	CR626902.1
0.0133909	0.806523	0.154	0.12	1	ptprea
0.013443	1.38327	0.052	0.028	1	slc12a7a
0.0134758	1.83954	0.02	0.005	1	dpy19l3
0.0135789	3.93492	0.014	0.002	1	sh3bp4
0.0135789	3.79002	0.014	0.002	1	si:dkey-58f10.10
0.0136233	3.77056	0.014	0.002	1	yeats2
0.0137419	0.61002	0.153	0.118	1	dusp6
0.0137538	1.43079	0.043	0.021	1	si:dkey-89b17.4
0.0137863	1.20448	0.05	0.026	1	cry2
0.0138668	1.24864	0.041	0.019	1	si:ch211-234h8.7
0.0139036	0.935075	0.103	0.072	1	rab4b
0.0141559	2.2667	0.023	0.007	1	zgc:163098
0.0141575	1.28087	0.041	0.019	1	znrf3
0.0141656	1.72335	0.031	0.012	1	acvr2bb
0.014236	2.14847	0.022	0.007	1	eif2a
0.0142481	1.50643	0.041	0.019	1	dgcr2
0.0143295	0.766385	0.112	0.081	1	ddx21
0.0143371	1.43748	0.062	0.035	1	cfh
0.0144859	0.890054	0.069	0.042	1	srsf9
0.0144876	1.87469	0.035	0.014	1	kdm4aa
0.0145604	0.868312	0.118	0.085	1	zgc:92360
0.0145639	5.29648	0.01	0	1	gnpda2
0.0145639	5.35615	0.01	0	1	AL645691.2
0.0145639	5.05717	0.01	0	1	exosc6
0.0145639	4.91071	0.01	0	1	LO018430.1
0.0145639	5.27462	0.01	0	1	LOC100535772
0.0145639	5.11261	0.01	0	1	LOC100536462
0.0145639	5.20882	0.01	0	1	scn2b
0.0145639	5.1888	0.01	0	1	si:dkey-261j4.4
0.0145639	5.19023	0.01	0	1	zgc:174690
0.0145639	5.28202	0.01	0	1	zgc:194655
0.0145782	1.70386	0.03	0.012	1	sh3glb2a
0.0147322	1.30141	0.036	0.016	1	si:ch73-233k15.2
0.0147372	2.62497	0.017	0.004	1	macrod1
0.0147547	0.85986	0.103	0.071	1	prune2
0.0148018	3.11833	0.017	0.002	1	nbeal1
0.0148701	2.16637	0.038	0.018	1	dscamb
0.0149224	1.11427	0.086	0.058	1	gramd1c
0.0149422	2.19968	0.02	0.005	1	si:dkeyp-118b1.2
0.0149754	2.23411	0.017	0.004	1	ypel1
0.0149934	1.14781	0.043	0.021	1	bcorl1
0.0150325	1.99542	0.02	0.005	1	cat
0.0151334	1.93556	0.02	0.005	1	LO018490.1
0.0151679	0.750714	0.199	0.168	1	chsy1
0.0153368	0.40114	0.143	0.108	1	rn7sk
0.0153593	1.04544	0.055	0.032	1	sub1b
0.0154503	1.59421	0.036	0.016	1	foxk1
0.0154897	0.88488	0.119	0.086	1	asah1b
0.0155001	1.56888	0.035	0.016	1	frem3
0.0155163	0.741162	0.088	0.058	1	rgl2
0.0155313	3.72277	0.013	0.002	1	si:ch211-195b13.6
0.015535	1.92127	0.03	0.011	1	nfkb2
0.015544	3.36676	0.014	0.002	1	ATG14
0.0155566	3.4827	0.013	0.002	1	mir457b
0.015582	3.21048	0.014	0.002	1	ryr3
0.0156651	1.53198	0.025	0.009	1	fam3a
0.0157453	1.02913	0.037	0.018	1	zgc:171480
0.0157476	2.89695	0.014	0.002	1	ube4a
0.0158102	2.53998	0.023	0.005	1	si:ch1073-324l1.1
0.0158556	1.36759	0.044	0.023	1	rnf114
0.0158889	2.32267	0.013	0.002	1	fblim1
0.0159191	2.3211	0.022	0.007	1	si:dkey-40c23.2
0.0160847	1.58086	0.033	0.012	1	cnot6l
0.0160936	0.915173	0.118	0.086	1	maml3
0.0161372	0.980354	0.09	0.062	1	pnkd
0.0161798	0.872385	0.124	0.092	1	CT027744.2
0.0161865	1.45572	0.03	0.012	1	mrpl34
0.0161893	2.05702	0.023	0.007	1	ypel3
0.0162333	1.39273	0.033	0.014	1	zc3h7ba
0.0162738	0.893039	0.12	0.088	1	fgd6
0.0165129	0.80049	0.149	0.116	1	arglu1b
0.0165247	0.658786	0.168	0.131	1	ola1
0.0166494	1.41845	0.037	0.018	1	aldh18a1
0.0166988	5.46821	0.01	0	1	si:dkey-201c13.2
0.0166988	5.04243	0.01	0	1	uros
0.0167223	2.41755	0.025	0.009	1	arhgap20b
0.0167995	2.79624	0.017	0.004	1	znf576.1
0.0169039	2.23263	0.02	0.005	1	nxpe3
0.016941	1.12716	0.05	0.028	1	arrdc3b
0.0169435	1.88944	0.03	0.012	1	hs2st1a
0.0170206	0.350626	0.52	0.536	1	vamp8
0.0171424	0.972351	0.058	0.034	1	rnf213b
0.0171761	2.00392	0.018	0.005	1	dynll2b
0.0172366	0.994235	0.102	0.071	1	stim1b
0.0173079	1.74567	0.02	0.005	1	ftr67
0.0173501	1.00356	0.091	0.063	1	zfr2
0.0173774	1.03197	0.097	0.069	1	nbas
0.0174118	1.57639	0.035	0.016	1	larp1b
0.0174132	0.815507	0.116	0.083	1	arglu1a
0.0174256	1.24022	0.037	0.018	1	si:ch73-92i20.1
0.0174606	0.88639	0.112	0.081	1	arhgap25
0.0175319	0.959893	0.065	0.037	1	psmb13a
0.0177486	0.886949	0.064	0.039	1	vps26c
0.0177692	5.73739	0.013	0	1	arid3c
0.0178271	3.42001	0.013	0.002	1	asap2a
0.0178561	3.07844	0.013	0.002	1	si:ch211-221j21.3
0.0178996	3.00769	0.013	0.002	1	fam222bb
0.0179287	2.93108	0.013	0.002	1	omgb
0.0179433	2.85421	0.013	0.002	1	si:dkey-147f3.4
0.0179673	1.42907	0.044	0.023	1	itpr1a
0.0179688	0.88287	0.066	0.039	1	elof1
0.0180427	1.47741	0.039	0.018	1	ggnbp2
0.0182015	0.48355	0.349	0.328	1	lpp
0.0182796	2.3847	0.022	0.005	1	si:ch211-117k10.3
0.0184207	1.02657	0.056	0.032	1	per1a
0.0184905	0.689961	0.179	0.146	1	mctp2b
0.0185551	1.50646	0.037	0.018	1	nf1a
0.0187023	1.7834	0.022	0.007	1	BX323022.1
0.0187147	0.679885	0.131	0.099	1	ubtd2
0.0187254	1.8192	0.022	0.007	1	si:dkeyp-68b7.7
0.0187677	0.217331	0.74	0.808	1	rpl7a
0.0188318	0.570086	0.201	0.171	1	parp8
0.0188777	2.40546	0.028	0.009	1	bicd2
0.0191561	4.91213	0.01	0	1	amt
0.0191561	5.10639	0.01	0	1	FO393424.1
0.0191561	5.22926	0.01	0	1	mak
0.0193178	2.29333	0.016	0.004	1	si:dkey-72l14.4
0.0193457	2.17541	0.015	0.004	1	si:ch73-308l14.2
0.0195063	1.67295	0.025	0.009	1	si:ch211-137j23.8
0.0195674	1.8689	0.026	0.011	1	CU984600.2
0.0196544	0.800409	0.103	0.072	1	si:dkey-6e2.2
0.0198365	1.59964	0.029	0.011	1	mrpl18
0.0198776	1.19255	0.036	0.018	1	sp4
0.0203519	3.38636	0.013	0.002	1	CR382337.3
0.0203685	3.51521	0.013	0.002	1	fech
0.0204512	2.97724	0.012	0.002	1	ankle2
0.0206092	2.11194	0.022	0.007	1	sufu
0.0206356	0.941219	0.084	0.056	1	orai1a
0.0207038	0.959086	0.094	0.067	1	spen
0.0207154	0.619712	0.176	0.143	1	bcl2l1
0.020718	2.51547	0.013	0.002	1	sox6
0.0207363	1.89596	0.022	0.007	1	med20
0.0207407	1.04415	0.051	0.026	1	prkcba
0.0209667	1.78327	0.021	0.007	1	fdx2
0.021011	1.2524	0.048	0.026	1	ccdc115
0.0210182	1.74802	0.021	0.007	1	phpt1
0.0210456	1.02381	0.059	0.035	1	LOC101886030
0.021054	0.942411	0.032	0.014	1	si:dkey-106l3.7
0.0212048	0.4865	0.337	0.314	1	dock8
0.0212136	1.89064	0.024	0.009	1	polr2b
0.0215129	0.468406	0.228	0.19	1	rffl
0.0215535	0.961969	0.084	0.056	1	synj1
0.021573	1.11689	0.042	0.023	1	vps13c
0.0217288	1.21324	0.034	0.016	1	dcaf8
0.0219053	1.46627	0.041	0.021	1	LOC100535743
0.0219267	2.33353	0.015	0.004	1	fam208aa
0.0220136	2.13694	0.015	0.004	1	chtf8
0.0220325	1.66602	0.029	0.011	1	mt-nd6
0.022082	0.880933	0.05	0.028	1	CR354588.1
0.0221477	1.59187	0.029	0.012	1	ttc39a
0.0223592	0.988131	0.064	0.041	1	mpc2
0.0225726	1.43729	0.029	0.012	1	phax
0.0229248	0.573771	0.151	0.116	1	FBXO48
0.0230822	1.27844	0.029	0.012	1	atf7b
0.0231556	1.28078	0.036	0.018	1	bod1
0.0231776	0.28614	0.525	0.554	1	rpl5a
0.0232513	1.85484	0.021	0.007	1	nme2b.2
0.0232934	0.798013	0.127	0.095	1	ktn1
0.0233928	3.25792	0.013	0.002	1	acot11a
0.0234089	1.25415	0.036	0.018	1	LOC100332221
0.0239523	0.505809	0.216	0.183	1	ptpn22
0.0239635	0.639939	0.166	0.136	1	arhgap29b
0.024126	1.23544	0.038	0.019	1	rab6bb
0.0241465	0.621366	0.162	0.125	1	CABZ01058046.1
0.0243332	1.28552	0.033	0.016	1	scaf4a
0.0244166	0.849778	0.108	0.079	1	tbc1d10c
0.0244317	0.749386	0.2	0.171	1	dgkh
0.0244578	2.13412	0.018	0.005	1	ldb1a
0.0244993	1.4123	0.03	0.014	1	vgll4a
0.0245374	0.890024	0.065	0.041	1	klf9
0.0245701	2.17419	0.018	0.005	1	si:dkey-182g1.6
0.0247528	1.55767	0.026	0.009	1	mbtps1
0.0247801	2.01317	0.018	0.005	1	usf3
0.0247928	1.47095	0.044	0.025	1	ube2d4
0.0248937	1.84755	0.018	0.005	1	si:ch211-140b10.6
0.0249253	2.23779	0.015	0.004	1	LOC101884549
0.0249286	1.52871	0.029	0.012	1	myg1
0.0249789	2.25913	0.015	0.004	1	dtd1
0.0249789	2.21551	0.015	0.004	1	fbxo4
0.0249915	1.73941	0.017	0.005	1	klf11b
0.0250318	1.5111	0.029	0.012	1	parga
0.0250506	2.2427	0.015	0.004	1	galk1
0.025052	1.5265	0.036	0.016	1	si:dkeyp-113d7.10
0.0255322	1.25171	0.031	0.014	1	dnajc19
0.0255817	0.757588	0.093	0.065	1	LO017700.1
0.0258412	1.06292	0.078	0.053	1	fam214b
0.025898	1.08632	0.047	0.026	1	erlec1
0.0259265	1.14262	0.053	0.032	1	cables2b
0.026186	0.251062	0.61	0.633	1	serf2
0.026449	0.762649	0.117	0.086	1	nt5dc2
0.0266368	3.79852	0.012	0.002	1	ccdc102a
0.0266368	3.71372	0.012	0.002	1	senp6a
0.0266622	0.97293	0.056	0.034	1	gpd1c
0.0267021	1.08091	0.051	0.03	1	UBL4A
0.0267447	3.17811	0.012	0.002	1	fuca1.1
0.0267879	3.27858	0.011	0.002	1	tcf3a
0.0268096	3.03156	0.012	0.002	1	pbx1b
0.0268149	0.639836	0.13	0.099	1	rps6ka3a
0.0269134	2.04497	0.025	0.011	1	btbd3a
0.026924	1.27023	0.032	0.016	1	tcf12
0.0269242	1.21323	0.043	0.023	1	klf8
0.027005	2.60061	0.012	0.002	1	nek11
0.0271033	1.4756	0.03	0.014	1	zgc:161969
0.0271381	1.25465	0.043	0.025	1	lmf2b
0.02735	0.536908	0.202	0.169	1	anp32a
0.0276231	0.96124	0.084	0.056	1	scap
0.0277487	1.4157	0.028	0.009	1	esyt1b
0.0277487	1.67899	0.028	0.012	1	rprd2b
0.0278569	1.54918	0.026	0.011	1	acacb
0.0278909	2.11153	0.018	0.005	1	prdm11
0.0279198	1.44444	0.028	0.012	1	commd8
0.0279279	1.20602	0.044	0.025	1	sp2
0.027988	0.78894	0.109	0.081	1	dync1i2a
0.0279921	1.52576	0.023	0.009	1	grcc10
0.0280423	1.10762	0.04	0.021	1	ftr63
0.0282349	2.53626	0.015	0.004	1	mrpl3
0.0282501	1.41428	0.028	0.012	1	prkab1a
0.0282679	1.26997	0.035	0.018	1	map3k1
0.0283293	1.63327	0.018	0.005	1	epb41b
0.0284029	1.7535	0.017	0.005	1	ext1a
0.0286202	1.06738	0.065	0.041	1	tlr5a
0.0287206	0.63489	0.122	0.092	1	cox14
0.0289197	1.92198	0.03	0.014	1	jazf1b
0.0289451	0.929305	0.047	0.025	1	cahz
0.0294253	0.86401	0.081	0.053	1	erp44
0.0294369	1.24374	0.042	0.023	1	ushbp1
0.0294401	0.706465	0.16	0.132	1	arhgef2
0.0295372	0.670277	0.172	0.143	1	sf3b1
0.0295509	1.52506	0.039	0.021	1	ifi45
0.0296684	1.93823	0.02	0.007	1	tbcelb
0.0297578	1.79552	0.02	0.007	1	fbxo25
0.029773	0.278104	0.58	0.614	1	cnp
0.0297757	1.80675	0.02	0.007	1	sin3b
0.0298115	1.82483	0.02	0.007	1	thoc5
0.0298335	0.695859	0.132	0.102	1	gsto2
0.0299192	1.845	0.02	0.007	1	brwd3
0.029936	1.8833	0.023	0.009	1	casd1
0.029991	1.1857	0.042	0.023	1	bbx
0.0301333	0.841752	0.074	0.049	1	tle3b
0.030177	1.26895	0.033	0.016	1	hikeshi
0.0305099	0.571783	0.289	0.263	1	si:ch211-212k18.7
0.0305633	3.2414	0.012	0.002	1	lix1l
0.0306457	1.44316	0.02	0.007	1	msl1a
0.030656	1.83255	0.032	0.016	1	fam3c
0.030792	0.945344	0.055	0.034	1	limk1a
0.03091	2.73462	0.012	0.002	1	NHLRC3
0.0309202	0.845954	0.078	0.051	1	ctdp1
0.0310361	1.81842	0.023	0.007	1	secisbp2
0.0311598	2.12261	0.012	0.002	1	ccnh
0.0312075	2.16047	0.018	0.005	1	si:dkey-71l4.4
0.0312833	1.26918	0.025	0.011	1	si:ch211-197h24.8
0.0313766	0.525343	0.257	0.231	1	atf4a
0.0314101	2.17633	0.018	0.005	1	sfi1
0.0314457	1.28768	0.035	0.018	1	rab18a
0.0314644	0.240079	0.528	0.55	1	rpl6
0.0315525	2.02853	0.017	0.005	1	tasp1
0.0316351	0.733119	0.189	0.162	1	LOC101886015
0.0316809	1.72037	0.038	0.021	1	ZNF512B
0.0317365	1.93858	0.018	0.005	1	afg3l2
0.0319416	2.83984	0.015	0.004	1	tacr1a
0.0321464	2.74773	0.015	0.004	1	si:ch211-266o15.1
0.0323119	1.43493	0.037	0.019	1	uckl1b
0.0324608	1.41203	0.018	0.005	1	rexo4
0.0324773	0.932144	0.052	0.032	1	zmp:0000000521
0.0325594	2.15034	0.015	0.004	1	fbxo3
0.0325983	0.932507	0.055	0.034	1	batf3
0.033154	1.98763	0.02	0.007	1	znf839
0.0336323	1.54847	0.041	0.021	1	dennd4c
0.0337271	1.18953	0.032	0.016	1	smim20
0.0338524	1.12802	0.032	0.014	1	heatr5a
0.0339439	1.03996	0.054	0.034	1	slc7a4
0.0342552	0.56616	0.161	0.132	1	ak2
0.0343207	0.672949	0.091	0.065	1	commd3
0.0349689	3.13634	0.011	0.002	1	cyb561a3a
0.0349689	3.25684	0.011	0.002	1	OSCP1 (1 of many)
0.0351058	1.21918	0.035	0.018	1	dicp1.1
0.0351382	2.78344	0.011	0.002	1	tbc1d7
0.0351947	3.03089	0.011	0.002	1	pcsk5a
0.0351947	2.63306	0.011	0.002	1	bcor
0.0352053	1.54633	0.025	0.009	1	polr3k
0.035223	2.7143	0.011	0.002	1	CABZ01078055.1
0.0352514	2.91816	0.011	0.002	1	BX088686.1
0.0353624	1.43327	0.032	0.016	1	ube2g2
0.0353933	2.44269	0.011	0.002	1	gtpbp1l
0.0354218	2.38638	0.011	0.002	1	zgc:171566
0.0354724	2.4604	0.017	0.004	1	shroom4
0.0354979	0.792948	0.091	0.067	1	ythdf1
0.0355597	0.686981	0.152	0.125	1	nr1d2a
0.035598	2.19887	0.017	0.005	1	adss
0.0357095	1.47099	0.025	0.011	1	wdr81
0.0359621	1.32177	0.036	0.019	1	CABZ01087514.1
0.0359884	1.88437	0.017	0.005	1	tchp
0.0364291	1.55639	0.016	0.005	1	gon4l
0.0364985	2.41919	0.014	0.004	1	pop5
0.0365789	0.515062	0.28	0.254	1	rhbdf1a
0.0366535	2.23083	0.014	0.004	1	fscn1b
0.0367098	1.58042	0.017	0.005	1	slc17a5
0.0367227	1.28552	0.046	0.026	1	fam102ba
0.0367593	1.24972	0.038	0.021	1	znhit1
0.036835	2.30445	0.014	0.004	1	ngrn
0.036861	2.00674	0.014	0.004	1	elmod2
0.036861	2.37075	0.014	0.004	1	ncaph
0.036861	2.24172	0.014	0.004	1	opn8c
0.0368676	1.48914	0.03	0.014	1	plekhm1
0.0370159	1.36331	0.016	0.005	1	spsb3a
0.037279	1.81024	0.014	0.004	1	cop1
0.0373298	1.30404	0.03	0.014	1	ttc1
0.0374241	0.663722	0.141	0.111	1	ankrd12
0.0376177	1.84828	0.019	0.007	1	fbxw8
0.037673	1.13437	0.051	0.032	1	fam49a
0.0377823	1.06361	0.063	0.041	1	si:dkey-67c22.2
0.0379987	1.2784	0.041	0.023	1	zgc:136439
0.0381252	0.846214	0.08	0.056	1	med11
0.0384725	1.57749	0.025	0.011	1	zgc:112023
0.0386525	0.791575	0.135	0.106	1	macrod2
0.0386775	1.39799	0.019	0.007	1	nelfa
0.0386906	1.03062	0.063	0.042	1	arhgef12a
0.0387612	1.28446	0.027	0.012	1	snapin
0.0388676	0.784351	0.088	0.063	1	srprb
0.0389346	1.25425	0.049	0.03	1	sec22c
0.0389426	1.44117	0.03	0.016	1	clockb
0.0394675	1.41749	0.036	0.018	1	usp22
0.039648	1.14306	0.034	0.018	1	abi2b
0.0396573	0.800289	0.101	0.076	1	fam43a
0.0396574	1.34126	0.025	0.011	1	tmem150ab
0.0398729	0.865936	0.055	0.035	1	cnbpa
0.0399407	1.17282	0.043	0.023	1	nudcd3
0.0401491	0.489734	0.336	0.319	1	cmip
0.0401552	3.01904	0.011	0.002	1	irf3
0.0401552	3.70558	0.01	0.002	1	cdkn3
0.040175	1.14354	0.034	0.016	1	mast3b
0.0401875	3.13149	0.01	0.002	1	cdk4
0.0402197	3.31445	0.01	0.002	1	ms4a17a.6
0.0403167	2.85629	0.01	0.002	1	kif22
0.0403814	2.74003	0.01	0.002	1	ing2
0.0404138	2.71488	0.011	0.002	1	si:dkeyp-80c12.7
0.0404462	2.33835	0.01	0.002	1	kaznb
0.0404787	2.69807	0.01	0.002	1	cyp2aa6
0.0404839	1.09331	0.043	0.025	1	xpnpep2
0.0404912	2.32011	0.017	0.004	1	CABZ01069040.1
0.0405945	2.23592	0.017	0.004	1	elp6
0.0406721	1.82386	0.016	0.005	1	lrch1
0.0406738	2.37948	0.011	0.002	1	tsen15
0.0407064	2.33847	0.011	0.002	1	tac1
0.0407348	0.883151	0.034	0.018	1	thtpa
0.0408698	1.95764	0.011	0.002	1	tex10
0.0408894	0.962812	0.042	0.025	1	CZQB01141835.1
0.041522	0.457291	0.386	0.384	1	zgc:91976
0.0416048	1.11487	0.043	0.023	1	psmg1
0.0416476	2.32642	0.014	0.004	1	mcoln2
0.0417639	1.33858	0.042	0.023	1	wwc1
0.0418164	0.546899	0.297	0.282	1	myh11a
0.0419426	2.0351	0.019	0.007	1	idi1
0.0421211	1.33189	0.034	0.018	1	glceb
0.0421472	2.18818	0.013	0.004	1	mcm2
0.0422062	1.08588	0.067	0.042	1	lcorl
0.0422995	1.0532	0.053	0.032	1	zgc:66475
0.0423293	1.45198	0.038	0.021	1	CU694532.1
0.0423841	1.80581	0.014	0.004	1	dglucy
0.0424435	1.77106	0.014	0.004	1	rcbtb1
0.0424967	1.10459	0.038	0.021	1	ube3a
0.0426606	0.702208	0.151	0.127	1	dido1
0.0426866	1.11476	0.042	0.025	1	kat2b
0.0427835	1.34571	0.026	0.012	1	brd3b
0.0428089	1.62536	0.024	0.011	1	ttpal
0.042835	1.32813	0.04	0.021	1	tbc1d4
0.0431212	1.07403	0.063	0.042	1	ostm1
0.0433787	1.28789	0.026	0.012	1	hadh
0.0434455	1.46954	0.019	0.007	1	mntb
0.0437524	0.661472	0.119	0.093	1	etnk1
0.0437526	1.39239	0.036	0.019	1	zdhhc6
0.0437584	1.4577	0.022	0.009	1	si:dkey-52l18.4
0.0439477	0.528209	0.096	0.072	1	skia
0.0440519	0.657789	0.122	0.097	1	pkn1b
0.0444854	0.842306	0.102	0.076	1	gpr146
0.0447804	1.40237	0.03	0.014	1	si:ch211-113d22.2
0.0449899	1.1371	0.024	0.011	1	tlr22
0.0452303	0.709619	0.131	0.102	1	eif3i
0.0453227	2.0547	0.016	0.005	1	zbtb44
0.0453704	0.794356	0.046	0.028	1	lgals9l1
0.0454623	1.02172	0.043	0.025	1	zbtb7b
0.0455656	1.37187	0.029	0.014	1	slc25a36a
0.0455817	1.99973	0.016	0.005	1	LO018383.1
0.0455986	1.36551	0.046	0.026	1	si:dkey-46g23.1
0.0458417	1.26787	0.032	0.018	1	eif4ebp3
0.0459833	3.21382	0.01	0.002	1	si:dkey-152b24.8
0.0460201	3.4267	0.01	0.002	1	si:dkey-1b17.5
0.0460841	1.59375	0.035	0.019	1	zgc:56235
0.0461678	2.72778	0.01	0.002	1	vrk2
0.0461868	0.957251	0.029	0.016	1	si:ch73-281n10.2
0.0462388	1.11491	0.04	0.023	1	tmem170b
0.0463076	1.74365	0.016	0.005	1	rev3l
0.0463158	2.48505	0.01	0.002	1	kxd1
0.0463529	2.58172	0.01	0.002	1	zgc:174906
0.0464642	2.53366	0.01	0.002	1	LOC110439377
0.0465386	2.38433	0.01	0.002	1	LOC101885465
0.046555	1.27596	0.033	0.018	1	otud6b
0.0466086	0.796913	0.077	0.055	1	trappc2l
0.0466131	2.33476	0.01	0.002	1	si:ch211-151m7.6
0.0466131	2.35059	0.01	0.002	1	LOC100537147
0.0466503	2.17663	0.01	0.002	1	nlrc5
0.0466889	1.73737	0.016	0.005	1	rbks
0.0467678	1.20723	0.028	0.014	1	zgc:77838
0.0469213	1.36325	0.029	0.014	1	BX927121.1
0.0470531	1.1504	0.061	0.039	1	FP236734.1
0.0470926	0.904896	0.059	0.039	1	aimp2
0.0473432	1.46547	0.026	0.012	1	sccpdhb
0.0474006	1.1569	0.033	0.018	1	rabac1
0.0474554	0.868005	0.045	0.026	1	sco1
0.0475298	0.585013	0.142	0.115	1	gm2a
0.0475479	0.856807	0.142	0.12	1	zgc:152863
0.0475796	1.16766	0.042	0.023	1	mecp2
0.0476241	2.11623	0.013	0.004	1	mlycd
0.0477571	2.25265	0.013	0.004	1	LOC103910383
0.047835	0.295234	0.526	0.534	1	rnaset2
0.0478571	2.12561	0.013	0.004	1	cers6
0.0478734	1.62692	0.018	0.007	1	nmt2
0.0478905	1.86497	0.013	0.004	1	si:dkey-37m8.11
0.0480548	1.61864	0.019	0.007	1	LOC110440216
0.048302	1.64652	0.021	0.009	1	ggcx
0.0484555	1.16976	0.042	0.023	1	nhp2
0.0485922	0.731359	0.149	0.123	1	adam8b
0.0489177	0.86199	0.026	0.012	1	chl1a
0.0490163	1.6196	0.021	0.009	1	fancc
0.0490367	0.716162	0.136	0.111	1	sptlc3
0.0491755	0.747845	0.118	0.093	1	ep300b
0.0492295	0.957416	0.028	0.014	1	aqp1a.1
0.0492512	0.80558	0.077	0.055	1	churc1
0.0493335	0.8072	0.106	0.078	1	mark3b
0.0494143	1.17289	0.031	0.016	1	umad1
0.0496393	0.603458	0.224	0.201	1	mknk1
0.0496682	1.36871	0.033	0.018	1	them6
